# Supplementary material for: Which Factors Affect the Occurrence of Off-Target Effects Caused by the Use of CRISPR/Cas: A Systematic Review in Plants
Source: Front Plant Sci. 2020 Nov 23;11:574959. doi: 10.3389/fpls.2020.574959 (PMC7719684; doi:10.3389/fpls.2020.574959)
Supplement: Supplementary file 6 [file Table_6.XLSX]

## Sheet: READ ME
Additional file 6
Detailed information about meta-analysis
Tab	Description
"Studies included for meta-analysis"	A list of all potential off-target sequences included for meta-analysis
"Excluded studies"	A list of all potential off-target sequences excluded for meta-analysis
"Code Full Model"	Description of the code to conduct the Full Model analysis
"Analysis Full Model"	Meta-analysis-Full Model
"Code Reduced Model"	Description of the code to conduct the Reduced Model analysis
"Analysis Reduced Model"	Meta-analysis-Reduced Model
"Code Final Model"	Description of the code to conduct the Final Model analysis
"Analysis Final Model"	Meta-analysis-Final Model

## Sheet: Studies included for meta-analy
Article number	Study number	DOI	Number of mismatches	Mismatch/es within seed sequence	CRISPR + Nuclease variant2	Delivery method	GC-content2	Off-target identified
4	1	10.1111/pbi.12758	≥4	No	SpCas9	DNA-stable	Low	No
4	2	10.1111/pbi.12758	3	No	SpCas9	DNA-stable	High	No
4	3	10.1111/pbi.12758	≥4	No	SpCas9	DNA-stable	Low	No
6	1	10.1038/srep44304	2	No	SpCas9	DNA-stable	High	No
6	2	10.1038/srep44304	≥4	No	SpCas9	DNA-stable	Low	No
6	2	10.1038/srep44304	3	No	SpCas9	DNA-stable	Low	No
6	2	10.1038/srep44304	3	No	SpCas9	DNA-stable	Low	No
7	2	10.1111/pbi.12596	≥4	No	SpCas9	DNA-stable	High	No
8	2	10.1038/srep38169	1	No	Others	DNA-stable	High	Yes
8	2	10.1038/srep38169	2	No	Others	DNA-stable	High	No
8	3	10.1038/srep38169	1	No	Others	DNA-stable	Low	No
8	3	10.1038/srep38169	1	No	Others	DNA-stable	Low	Yes
8	3	10.1038/srep38169	2	No	Others	DNA-stable	Low	No
9		10.1093/pcp/pcu154	1	No	SpCas9	DNA-stable	High	Yes
9		10.1093/pcp/pcu154	2	No	SpCas9	DNA-stable	High	Yes
9		10.1093/pcp/pcu154	≥4	No	SpCas9	DNA-stable	High	No
9		10.1093/pcp/pcu154	≥4	No	SpCas9	DNA-stable	High	No
10	2	10.1016/j.jgg.2015.10.002	3	No	SpCas9	DNA-stable	High	No
11	2	10.1073/pnas.1400822111	1	No	SpCas9	DNA-stable	Low	No
12		10.1007/s11103-014-0263-0	2	No	SpCas9	DNA-stable	Low	No
13		10.3389/fpls.2017.00039	1	No	SpCas9	DNA-stable	Low	No
14	1	10.1016/j.molp.2016.03.003	1	No	Others	DNA-stable	High	Yes
16	2	10.1007/s00425-014-2180-5	3	No	SpCas9	DNA-stable	Low	No
18	5	10.1186/s12896-015-0131-2	1	No	SpCas9	DNA-stable	Low	Yes
18	5	10.1186/s12896-015-0131-2	2	No	SpCas9	DNA-stable	Low	Yes
18	5	10.1186/s12896-015-0131-2	≥4	No	SpCas9	DNA-stable	Low	No
19		10.1111/pbi.12495	≥4	No	SpCas9	DNA-stable	Low	No
19		10.1111/pbi.12495	≥4	No	SpCas9	DNA-stable	Low	No
19		10.1111/pbi.12495	≥4	No	SpCas9	DNA-stable	Low	No
19		10.1111/pbi.12495	≥4	No	SpCas9	DNA-stable	Low	No
19		10.1111/pbi.12495	≥4	No	SpCas9	DNA-stable	Low	No
19		10.1111/pbi.12495	≥4	No	SpCas9	DNA-stable	Low	No
21		10.1111/pbi.12677	≥4	No	SpCas9	DNA-stable	High	No
21		10.1111/pbi.12677	≥4	No	SpCas9	DNA-stable	High	No
21		10.1111/pbi.12677	≥4	No	SpCas9	DNA-stable	High	No
22		10.1111/pbi.12663	≥4	No	SpCas9	DNA-stable	High	No
22		10.1111/pbi.12663	≥4	No	SpCas9	DNA-stable	High	No
22		10.1111/pbi.12663	≥4	No	SpCas9	DNA-stable	High	No
26	1	10.1038/srep43902	1	No	SpCas9	DNA-stable	Low	No
27	1	10.1038/nplants.2016.139	≥4	No	SpCas9	DNA-stable	Low	No
27	2	10.1038/nplants.2016.139	3	No	SpCas9	DNA-stable	Low	No
27	2	10.1038/nplants.2016.139	3	No	SpCas9	DNA-stable	Low	No
27	2	10.1038/nplants.2016.139	3	No	SpCas9	DNA-stable	Low	No
27	2	10.1038/nplants.2016.139	≥4	No	SpCas9	DNA-stable	Low	No
27	2	10.1038/nplants.2016.139	≥4	No	SpCas9	DNA-stable	Low	No
28	1	10.3389/fpls.2016.00377	≥4	No	SpCas9	DNA-stable	Low	Yes
28	1	10.3389/fpls.2016.00377	≥4	No	SpCas9	DNA-stable	Low	No
28	2	10.3389/fpls.2016.00377	≥4	No	SpCas9	DNA-stable	High	No
28	3	10.3389/fpls.2016.00377	2	No	SpCas9	DNA-stable	High	Yes
28	3	10.3389/fpls.2016.00377	≥4	No	SpCas9	DNA-stable	High	No
28	4	10.3389/fpls.2016.00377	≥4	No	SpCas9	DNA-stable	High	No
29	1	10.1038/ncomms14261	1	No	SpCas9	Others	High	Yes
29	2	10.1038/ncomms14261	1	No	SpCas9	Others	High	Yes
29	3	10.1038/ncomms14261	3	No	SpCas9	Others	High	No
29	3	10.1038/ncomms14261	3	No	SpCas9	Others	High	No
29	3	10.1038/ncomms14261	≥4	No	SpCas9	Others	High	No
29	3	10.1038/ncomms14261	≥4	No	SpCas9	Others	High	No
29	3	10.1038/ncomms14261	≥4	No	SpCas9	Others	High	No
29	3	10.1038/ncomms14261	≥4	No	SpCas9	Others	High	No
29	3	10.1038/ncomms14261	≥4	No	SpCas9	Others	High	No
30	1	10.1534/g3.116.033266	≥4	No	SpCas9	DNA-stable	High	No
30	5	10.1534/g3.116.033266	3	No	SpCas9	DNA-stable	High	No
30	6	10.1534/g3.116.033266	3	No	SpCas9	DNA-stable	High	No
34	1	10.1093/pcp/pcw173	≥4	No	SpCas9	DNA-stable	High	No
36	3	10.1038/srep24765	3	No	SpCas9	DNA-stable	High	No
37	5	10.1371/journal.pone.0162169	3	No	SpCas9	DNA-stable	Low	No
37	8	10.1371/journal.pone.0162169	3	No	SpCas9	DNA-stable	Low	No
37	8	10.1371/journal.pone.0162169	3	No	SpCas9	DNA-stable	Low	No
37	11	10.1371/journal.pone.0162169	3	No	SpCas9	DNA-stable	Low	No
38	1	10.1038/srep32289	≥4	No	SpCas9	DNA-stable	High	No
38	2	10.1038/srep32289	≥4	No	SpCas9	DNA-stable	Low	No
38	2	10.1038/srep32289	≥4	No	SpCas9	DNA-stable	Low	No
39	2	10.1104/pp.15.01696	≥4	No	SpCas9	Others	High	No
39	2	10.1104/pp.15.01696	≥4	No	SpCas9	Others	High	No
39	2	10.1104/pp.15.01696	≥4	No	SpCas9	Others	High	No
39	2	10.1104/pp.15.01696	≥4	No	SpCas9	Others	High	No
40	2	10.1038/nbt.2650	1	No	SpCas9	DNA-stable	High	Yes
43	2	10.3389/fpls.2017.00298	3	No	SpCas9	DNA-stable	Low	No
44	1	10.1038/ncomms13274	2	No	SpCas9	DNA-stable	High	Yes
44	2	10.1038/ncomms13274	2	No	SpCas9	Others	High	Yes
45	1	10.1016/j.molp.2016.05.001	≥4	No	SpCas9	DNA-stable	High	No
45	1	10.1016/j.molp.2016.05.001	≥4	No	SpCas9	DNA-stable	High	No
45	1	10.1016/j.molp.2016.05.001	≥4	No	SpCas9	DNA-stable	High	No
45	1	10.1016/j.molp.2016.05.001	≥4	No	SpCas9	DNA-stable	High	No
45	2	10.1016/j.molp.2016.05.001	≥4	No	SpCas9	DNA-stable	Low	No
47		10.1534/g3.113.008847	1	No	SpCas9	Others	High	No
47		10.1534/g3.113.008847	1	No	SpCas9	Others	High	Yes
47		10.1534/g3.113.008847	2	No	SpCas9	Others	High	Yes
47		10.1534/g3.113.008847	3	No	SpCas9	Others	High	No
47		10.1534/g3.113.008847	3	No	SpCas9	Others	High	Yes
47		10.1534/g3.113.008847	≥4	No	SpCas9	Others	High	No
49	1	10.1016/j.molp.2017.03.001	≥4	No	Others	DNA-stable	High	No
49	1	10.1016/j.molp.2017.03.001	≥4	No	Others	DNA-stable	High	No
49	2	10.1016/j.molp.2017.03.001	≥4	No	Others	DNA-stable	High	No
49	3	10.1016/j.molp.2017.03.001	≥4	No	Others	DNA-stable	High	No
49	4	10.1016/j.molp.2017.03.001	≥4	No	Others	DNA-stable	High	No
49	5	10.1016/j.molp.2017.03.001	≥4	No	Others	DNA-stable	Low	No
49	5	10.1016/j.molp.2017.03.001	≥4	No	Others	DNA-stable	Low	No
49	8	10.1016/j.molp.2017.03.001	≥4	No	Others	DNA-stable	High	No
51		10.1186/s13059-015-0715-0	≥4	No	SpCas9	DNA-stable	Low	No
52	1	10.1038/nbt.3389	≥4	No	SpCas9	Others	High	No
52	2	10.1038/nbt.3389	≥4	No	SpCas9	Others	Low	No
52	4	10.1038/nbt.3389	2	No	SpCas9	Others	Low	No
52	4	10.1038/nbt.3389	3	No	SpCas9	Others	Low	No
52	4	10.1038/nbt.3389	3	No	SpCas9	Others	Low	No
53		10.1093/mp/sst119	3	No	SpCas9	Others	High	Yes
53		10.1093/mp/sst119	≥4	No	SpCas9	Others	High	No
54	1	10.1038/srep11491	1	No	SpCas9	DNA-stable	High	Yes
54	1	10.1038/srep11491	3	No	SpCas9	DNA-stable	High	No
57		10.1038/srep41993	1	No	SpCas9	DNA-stable	High	No
57		10.1038/srep41993	2	No	SpCas9	DNA-stable	High	Yes
57		10.1038/srep41993	3	No	SpCas9	DNA-stable	High	No
58	1	10.1111/pbi.12200	≥4	No	SpCas9	DNA-stable	High	No
58	1	10.1111/pbi.12200	≥4	No	SpCas9	DNA-stable	High	No
58	2	10.1111/pbi.12200	≥4	No	SpCas9	DNA-stable	High	No
58	2	10.1111/pbi.12200	≥4	No	SpCas9	DNA-stable	High	No
58	3	10.1111/pbi.12200	1	No	SpCas9	DNA-stable	High	Yes
58	3	10.1111/pbi.12200	≥4	No	SpCas9	DNA-stable	High	No
58	3	10.1111/pbi.12200	≥4	No	SpCas9	DNA-stable	High	No
59	1	10.1038/ncomms12617	1	No	SpCas9	DNA-stable	High	Yes
59	2	10.1038/ncomms12617	1	No	SpCas9	Others	High	Yes
59	3	10.1038/ncomms12617	2	No	SpCas9	Others	High	No
59	3	10.1038/ncomms12617	2	No	SpCas9	Others	High	No
59	3	10.1038/ncomms12617	3	No	SpCas9	Others	High	No
59	3	10.1038/ncomms12617	3	No	SpCas9	Others	High	No
59	3	10.1038/ncomms12617	3	No	SpCas9	Others	High	No
59	3	10.1038/ncomms12617	3	No	SpCas9	Others	High	No
59	3	10.1038/ncomms12617	3	No	SpCas9	Others	High	No
59	3	10.1038/ncomms12617	3	No	SpCas9	Others	High	No
59	3	10.1038/ncomms12617	3	No	SpCas9	Others	High	No
59	3	10.1038/ncomms12617	3	No	SpCas9	Others	High	No
59	3	10.1038/ncomms12617	≥4	No	SpCas9	Others	High	No
59	3	10.1038/ncomms12617	≥4	No	SpCas9	Others	High	No
59	3	10.1038/ncomms12617	≥4	No	SpCas9	Others	High	No
59	3	10.1038/ncomms12617	≥4	No	SpCas9	Others	High	No
59	3	10.1038/ncomms12617	≥4	No	SpCas9	Others	High	No
59	4	10.1038/ncomms12617	3	No	SpCas9	DNA-stable	Low	No
59	4	10.1038/ncomms12617	≥4	No	SpCas9	DNA-stable	Low	No
59	4	10.1038/ncomms12617	≥4	No	SpCas9	DNA-stable	Low	No
59	4	10.1038/ncomms12617	≥4	No	SpCas9	DNA-stable	Low	No
59	4	10.1038/ncomms12617	≥4	No	SpCas9	DNA-stable	Low	No
59	5	10.1038/ncomms12617	3	No	SpCas9	Others	Low	No
59	5	10.1038/ncomms12617	≥4	No	SpCas9	Others	Low	No
59	5	10.1038/ncomms12617	≥4	No	SpCas9	Others	Low	No
59	5	10.1038/ncomms12617	≥4	No	SpCas9	Others	Low	No
59	5	10.1038/ncomms12617	≥4	No	SpCas9	Others	Low	No
59	6	10.1038/ncomms12617	1	No	SpCas9	Others	High	Yes
59	7	10.1038/ncomms12617	3	No	SpCas9	Others	Low	No
59	7	10.1038/ncomms12617	≥4	No	SpCas9	Others	Low	No
59	7	10.1038/ncomms12617	≥4	No	SpCas9	Others	Low	No
59	7	10.1038/ncomms12617	≥4	No	SpCas9	Others	Low	No
59	7	10.1038/ncomms12617	≥4	No	SpCas9	Others	Low	No
60		10.1007/s00299-015-1900-z	1	No	SpCas9	DNA-stable	Low	No
61	2	10.1038/srep37395	≥4	No	SpCas9	DNA-stable	Low	No
61	2	10.1038/srep37395	≥4	No	SpCas9	DNA-stable	Low	No
61	2	10.1038/srep37395	≥4	No	SpCas9	DNA-stable	Low	No
61	2	10.1038/srep37395	≥4	No	SpCas9	DNA-stable	Low	No
61	2	10.1038/srep37395	≥4	No	SpCas9	DNA-stable	Low	No
61	2	10.1038/srep37395	≥4	No	SpCas9	DNA-stable	Low	No
61	2	10.1038/srep37395	≥4	No	SpCas9	DNA-stable	Low	No
61	2	10.1038/srep37395	3	No	SpCas9	DNA-stable	Low	No
64		10.1016/j.jgg.2015.10.006	≥4	No	SpCas9	DNA-stable	Low	No
66		10.1104/pp.17.00426	1	No	SpCas9	DNA-stable	High	Yes
66		10.1104/pp.17.00426	2	No	SpCas9	DNA-stable	High	No
68	1	10.1016/j.jgg.2017.10.002	2	No	SpCas9	DNA-stable	High	No
68	2	10.1016/j.jgg.2017.10.002	2	No	SpCas9	DNA-stable	Low	No
68	2	10.1016/j.jgg.2017.10.002	2	No	SpCas9	DNA-stable	Low	No
69	1	10.3389/fpls.2018.00594	≥4	No	SpCas9	DNA-stable	High	No
69	1	10.3389/fpls.2018.00594	3	No	SpCas9	DNA-stable	High	No
69	2	10.3389/fpls.2018.00594	3	No	SpCas9	DNA-stable	High	No
69	2	10.3389/fpls.2018.00594	3	No	SpCas9	DNA-stable	High	No
69	2	10.3389/fpls.2018.00594	3	No	SpCas9	DNA-stable	High	No
70	2	10.1111/pbi.12920	3	No	SpCas9	DNA-stable	Low	No
70	2	10.1111/pbi.12920	3	No	SpCas9	DNA-stable	Low	No
70	2	10.1111/pbi.12920	3	No	SpCas9	DNA-stable	Low	No
72		10.3390/ijms19041062	≥4	No	SpCas9	DNA-stable	High	No
74		10.1111/pbi.12771	1	No	Others	DNA-stable	Low	Yes
74		10.1111/pbi.12771	1	No	Others	DNA-stable	Low	Yes
74		10.1111/pbi.12771	1	No	Others	DNA-stable	Low	Yes
79		10.1111/tpj.13782	2	No	SpCas9	DNA-stable	High	No
80	1	10.1111/pbi.12886	≥4	No	SpCas9	DNA-stable	High	No
80	1	10.1111/pbi.12886	≥4	No	SpCas9	DNA-stable	High	No
80	1	10.1111/pbi.12886	≥4	No	SpCas9	DNA-stable	High	No
80	2	10.1111/pbi.12886	≥4	No	SpCas9	DNA-stable	High	No
80	3	10.1111/pbi.12886	≥4	No	SpCas9	DNA-stable	Low	No
80	3	10.1111/pbi.12886	≥4	No	SpCas9	DNA-stable	Low	No
80	3	10.1111/pbi.12886	≥4	No	SpCas9	DNA-stable	Low	No
81	1	10.1111/jipb.12650	≥4	No	SpCas9	DNA-stable	High	No
81	1	10.1111/jipb.12650	3	No	SpCas9	DNA-stable	High	No
81	2	10.1111/jipb.12650	≥4	No	SpCas9	DNA-stable	High	No
83	2	10.1111/pbi.12781	≥4	No	SpCas9	DNA-stable	High	No
83	4	10.1111/pbi.12781	≥4	No	SpCas9	DNA-stable	High	No
83	5	10.1111/pbi.12781	≥4	No	SpCas9	DNA-stable	High	No
83	7	10.1111/pbi.12781	≥4	No	SpCas9	DNA-stable	High	No
84	1	10.1016/j.molp.2018.03.009	≥4	No	Others	DNA-stable	High	No
84	2	10.1016/j.molp.2018.03.009	3	No	Others	DNA-stable	High	No
84	3	10.1016/j.molp.2018.03.009	≥4	No	Others	DNA-stable	High	No
85	1	10.3389/fpls.2018.00559	≥4	No	SpCas9	DNA-stable	High	No
85	2	10.3389/fpls.2018.00559	≥4	No	SpCas9	DNA-stable	High	No
88	1	10.1007/s11427-017-9247-9	1	No	SpCas9	DNA-stable	High	No
88	1	10.1007/s11427-017-9247-9	1	No	SpCas9	DNA-stable	High	Yes
88	1	10.1007/s11427-017-9247-9	1	No	SpCas9	DNA-stable	High	No
88	1	10.1007/s11427-017-9247-9	1	No	SpCas9	DNA-stable	High	Yes
88	1	10.1007/s11427-017-9247-9	1	No	SpCas9	DNA-stable	High	Yes
88	1	10.1007/s11427-017-9247-9	1	No	SpCas9	DNA-stable	High	Yes
88	1	10.1007/s11427-017-9247-9	1	No	SpCas9	DNA-stable	High	Yes
88	1	10.1007/s11427-017-9247-9	1	No	SpCas9	DNA-stable	High	Yes
88	1	10.1007/s11427-017-9247-9	1	No	SpCas9	DNA-stable	High	Yes
88	1	10.1007/s11427-017-9247-9	1	No	SpCas9	DNA-stable	High	Yes
88	1	10.1007/s11427-017-9247-9	1	No	SpCas9	DNA-stable	High	Yes
88	1	10.1007/s11427-017-9247-9	1	No	SpCas9	DNA-stable	High	Yes
88	1	10.1007/s11427-017-9247-9	2	No	SpCas9	DNA-stable	High	Yes
88	1	10.1007/s11427-017-9247-9	2	No	SpCas9	DNA-stable	High	Yes
88	1	10.1007/s11427-017-9247-9	2	No	SpCas9	DNA-stable	High	No
88	1	10.1007/s11427-017-9247-9	2	No	SpCas9	DNA-stable	High	Yes
88	1	10.1007/s11427-017-9247-9	2	No	SpCas9	DNA-stable	High	No
88	1	10.1007/s11427-017-9247-9	2	No	SpCas9	DNA-stable	High	No
88	1	10.1007/s11427-017-9247-9	3	No	SpCas9	DNA-stable	High	No
88	1	10.1007/s11427-017-9247-9	3	No	SpCas9	DNA-stable	High	No
88	1	10.1007/s11427-017-9247-9	3	No	SpCas9	DNA-stable	High	No
88	1	10.1007/s11427-017-9247-9	3	No	SpCas9	DNA-stable	High	No
88	3	10.1007/s11427-017-9247-9	3	No	SpCas9	DNA-stable	High	No
88	4	10.1007/s11427-017-9247-9	3	No	SpCas9	DNA-stable	High	No
88	5	10.1007/s11427-017-9247-9	≥4	No	SpCas9	DNA-stable	High	No
88	5	10.1007/s11427-017-9247-9	3	No	SpCas9	DNA-stable	High	No
89		10.1016/j.plaphy.2018.04.025	2	No	SpCas9	DNA-stable	Low	No
90		10.1111/pbi.12733	3	No	SpCas9	DNA-stable	Low	No
90		10.1111/pbi.12733	3	No	SpCas9	DNA-stable	Low	Yes
90		10.1111/pbi.12733	3	No	SpCas9	DNA-stable	Low	Yes
90		10.1111/pbi.12733	≥4	No	SpCas9	DNA-stable	Low	Yes
90		10.1111/pbi.12733	≥4	No	SpCas9	DNA-stable	Low	Yes
92	2	10.1101/277350	≥4	No	SpCas9	DNA-stable	High	No
93	1	10.1111/pbi.12755	≥4	No	SpCas9	DNA-stable	High	No
93	1	10.1111/pbi.12755	≥4	No	SpCas9	DNA-stable	High	No
93	1	10.1111/pbi.12755	≥4	No	SpCas9	DNA-stable	High	No
93	2	10.1111/pbi.12755	3	No	SpCas9	DNA-stable	Low	No
93	2	10.1111/pbi.12755	≥4	No	SpCas9	DNA-stable	Low	No
93	3	10.1111/pbi.12755	≥4	No	SpCas9	DNA-stable	High	No
93	3	10.1111/pbi.12755	≥4	No	SpCas9	DNA-stable	High	No
93	3	10.1111/pbi.12755	≥4	No	SpCas9	DNA-stable	High	No
93	4	10.1111/pbi.12755	3	No	SpCas9	DNA-stable	Low	No
93	4	10.1111/pbi.12755	3	No	SpCas9	DNA-stable	Low	No
93	4	10.1111/pbi.12755	≥4	No	SpCas9	DNA-stable	Low	No
93	4	10.1111/pbi.12755	≥4	No	SpCas9	DNA-stable	Low	No
93	4	10.1111/pbi.12755	≥4	No	SpCas9	DNA-stable	Low	No
94	3	10.1111/pbi.12832	≥4	No	SpCas9	DNA-stable	High	No
96	4	10.1038/s41598-017-07871-9	3	No	SpCas9	DNA-stable	High	No
96	6	10.1038/s41598-017-07871-9	3	No	SpCas9	DNA-stable	High	No
96	7	10.1038/s41598-017-07871-9	2	No	SpCas9	DNA-stable	High	No
97	1	10.1007/s00299-017-2172-6	≥4	No	SpCas9	DNA-stable	High	No
97	3	10.1007/s00299-017-2172-6	≥4	No	SpCas9	DNA-stable	High	No
98	1	10.1111/pbi.12872	3	No	SpCas9	DNA-stable	Low	No
98	1	10.1111/pbi.12872	3	No	SpCas9	DNA-stable	Low	No
98	1	10.1111/pbi.12872	3	No	SpCas9	DNA-stable	Low	No
98	1	10.1111/pbi.12872	≥4	No	SpCas9	DNA-stable	Low	No
98	1	10.1111/pbi.12872	≥4	No	SpCas9	DNA-stable	Low	No
98	1	10.1111/pbi.12872	≥4	No	SpCas9	DNA-stable	Low	No
98	2	10.1111/pbi.12872	≥4	No	SpCas9	DNA-stable	High	No
98	2	10.1111/pbi.12872	≥4	No	SpCas9	DNA-stable	High	No
99		10.1007/s00299-017-2118-z	3	No	SpCas9	DNA-stable	High	No
99		10.1007/s00299-017-2118-z	3	No	SpCas9	DNA-stable	High	No
100		10.1038/s41598-017-12262-1	≥4	No	SpCas9	DNA-stable	Low	No
100		10.1038/s41598-017-12262-1	≥4	No	SpCas9	DNA-stable	Low	No
100		10.1038/s41598-017-12262-1	≥4	No	SpCas9	DNA-stable	Low	No
101	1	10.1186/s13059-017-1325-9	1	No	Others	DNA-stable	High	Yes
101	1	10.1186/s13059-017-1325-9	2	No	Others	DNA-stable	High	Yes
101	2	10.1186/s13059-017-1325-9	1	No	Others	DNA-stable	High	Yes
101	2	10.1186/s13059-017-1325-9	2	No	Others	DNA-stable	High	No
101	3	10.1186/s13059-017-1325-9	2	No	Others	DNA-stable	High	Yes
101	3	10.1186/s13059-017-1325-9	2	No	Others	DNA-stable	High	Yes
101	3	10.1186/s13059-017-1325-9	2	No	Others	DNA-stable	High	Yes
101	3	10.1186/s13059-017-1325-9	2	No	Others	DNA-stable	High	Yes
101	3	10.1186/s13059-017-1325-9	2	No	Others	DNA-stable	High	No
101	3	10.1186/s13059-017-1325-9	2	No	Others	DNA-stable	High	No
101	3	10.1186/s13059-017-1325-9	2	No	Others	DNA-stable	High	No
101	3	10.1186/s13059-017-1325-9	2	No	Others	DNA-stable	High	No
101	3	10.1186/s13059-017-1325-9	2	No	Others	DNA-stable	High	No
101	3	10.1186/s13059-017-1325-9	2	No	Others	DNA-stable	High	Yes
101	3	10.1186/s13059-017-1325-9	2	No	Others	DNA-stable	High	Yes
101	4	10.1186/s13059-017-1325-9	1	No	Others	DNA-stable	High	Yes
101	4	10.1186/s13059-017-1325-9	2	No	Others	DNA-stable	High	Yes
101	5	10.1186/s13059-017-1325-9	1	No	Others	DNA-stable	High	Yes
101	5	10.1186/s13059-017-1325-9	2	No	Others	DNA-stable	High	No
101	6	10.1186/s13059-017-1325-9	2	No	Others	DNA-stable	High	Yes
101	6	10.1186/s13059-017-1325-9	2	No	Others	DNA-stable	High	No
101	6	10.1186/s13059-017-1325-9	2	No	Others	DNA-stable	High	Yes
101	6	10.1186/s13059-017-1325-9	2	No	Others	DNA-stable	High	No
101	6	10.1186/s13059-017-1325-9	2	No	Others	DNA-stable	High	No
101	6	10.1186/s13059-017-1325-9	2	No	Others	DNA-stable	High	No
101	6	10.1186/s13059-017-1325-9	2	No	Others	DNA-stable	High	No
101	6	10.1186/s13059-017-1325-9	2	No	Others	DNA-stable	High	Yes
101	6	10.1186/s13059-017-1325-9	2	No	Others	DNA-stable	High	No
101	6	10.1186/s13059-017-1325-9	2	No	Others	DNA-stable	High	Yes
101	6	10.1186/s13059-017-1325-9	2	No	Others	DNA-stable	High	Yes
101	7	10.1186/s13059-017-1325-9	1	No	SpCas9	DNA-stable	High	Yes
101	7	10.1186/s13059-017-1325-9	2	No	SpCas9	DNA-stable	High	Yes
101	8	10.1186/s13059-017-1325-9	1	No	SpCas9	DNA-stable	High	Yes
101	8	10.1186/s13059-017-1325-9	2	No	SpCas9	DNA-stable	High	Yes
101	9	10.1186/s13059-017-1325-9	2	No	SpCas9	DNA-stable	High	Yes
101	9	10.1186/s13059-017-1325-9	2	No	SpCas9	DNA-stable	High	Yes
101	9	10.1186/s13059-017-1325-9	2	No	SpCas9	DNA-stable	High	Yes
101	9	10.1186/s13059-017-1325-9	2	No	SpCas9	DNA-stable	High	Yes
101	9	10.1186/s13059-017-1325-9	2	No	SpCas9	DNA-stable	High	Yes
101	9	10.1186/s13059-017-1325-9	2	No	SpCas9	DNA-stable	High	Yes
101	9	10.1186/s13059-017-1325-9	2	No	SpCas9	DNA-stable	High	Yes
101	9	10.1186/s13059-017-1325-9	2	No	SpCas9	DNA-stable	High	Yes
101	9	10.1186/s13059-017-1325-9	2	No	SpCas9	DNA-stable	High	Yes
101	9	10.1186/s13059-017-1325-9	2	No	SpCas9	DNA-stable	High	Yes
101	9	10.1186/s13059-017-1325-9	2	No	SpCas9	DNA-stable	High	Yes
101	10	10.1186/s13059-017-1325-9	1	No	Others	DNA-stable	High	Yes
101	10	10.1186/s13059-017-1325-9	2	No	Others	DNA-stable	High	No
101	11	10.1186/s13059-017-1325-9	1	No	Others	DNA-stable	High	Yes
101	11	10.1186/s13059-017-1325-9	2	No	Others	DNA-stable	High	No
101	12	10.1186/s13059-017-1325-9	2	No	Others	DNA-stable	High	Yes
101	12	10.1186/s13059-017-1325-9	2	No	Others	DNA-stable	High	Yes
101	12	10.1186/s13059-017-1325-9	2	No	Others	DNA-stable	High	No
101	12	10.1186/s13059-017-1325-9	2	No	Others	DNA-stable	High	No
101	12	10.1186/s13059-017-1325-9	2	No	Others	DNA-stable	High	Yes
101	12	10.1186/s13059-017-1325-9	2	No	Others	DNA-stable	High	No
101	12	10.1186/s13059-017-1325-9	2	No	Others	DNA-stable	High	No
101	12	10.1186/s13059-017-1325-9	2	No	Others	DNA-stable	High	No
101	12	10.1186/s13059-017-1325-9	2	No	Others	DNA-stable	High	No
101	12	10.1186/s13059-017-1325-9	2	No	Others	DNA-stable	High	No
101	12	10.1186/s13059-017-1325-9	2	No	Others	DNA-stable	High	Yes
102	2	10.1007/s00299-017-2202-4	≥4	No	SpCas9	DNA-stable	Low	No
106		10.1111/tpj.13599	3	No	SpCas9	DNA-stable	Low	No
106		10.1111/tpj.13599	≥4	No	SpCas9	DNA-stable	Low	No
106		10.1111/tpj.13599	≥4	No	SpCas9	DNA-stable	Low	No
107	1	10.3389/fpls.2017.01598	≥4	No	SpCas9	DNA-stable	High	No
107	1	10.3389/fpls.2017.01598	≥4	No	SpCas9	DNA-stable	High	No
107	1	10.3389/fpls.2017.01598	3	No	SpCas9	DNA-stable	High	No
107	1	10.3389/fpls.2017.01598	2	No	SpCas9	DNA-stable	High	No
107	1	10.3389/fpls.2017.01598	2	No	SpCas9	DNA-stable	High	No
107	2	10.3389/fpls.2017.01598	≥4	No	SpCas9	DNA-stable	High	No
107	2	10.3389/fpls.2017.01598	≥4	No	SpCas9	DNA-stable	High	No
107	2	10.3389/fpls.2017.01598	≥4	No	SpCas9	DNA-stable	High	No
107	2	10.3389/fpls.2017.01598	3	No	SpCas9	DNA-stable	High	No
107	2	10.3389/fpls.2017.01598	3	No	SpCas9	DNA-stable	High	No
107	3	10.3389/fpls.2017.01598	≥4	No	SpCas9	DNA-stable	High	No
107	3	10.3389/fpls.2017.01598	≥4	No	SpCas9	DNA-stable	High	No
107	3	10.3389/fpls.2017.01598	≥4	No	SpCas9	DNA-stable	High	No
107	3	10.3389/fpls.2017.01598	≥4	No	SpCas9	DNA-stable	High	No
107	4	10.3389/fpls.2017.01598	2	No	SpCas9	DNA-stable	High	No
107	4	10.3389/fpls.2017.01598	≥4	No	SpCas9	DNA-stable	High	No
107	4	10.3389/fpls.2017.01598	3	No	SpCas9	DNA-stable	High	No
107	5	10.3389/fpls.2017.01598	1	No	SpCas9	DNA-stable	High	No
107	5	10.3389/fpls.2017.01598	1	No	SpCas9	DNA-stable	High	No
107	5	10.3389/fpls.2017.01598	1	No	SpCas9	DNA-stable	High	No
107	5	10.3389/fpls.2017.01598	1	No	SpCas9	DNA-stable	High	No
107	5	10.3389/fpls.2017.01598	≥4	No	SpCas9	DNA-stable	High	No
107	6	10.3389/fpls.2017.01598	2	No	SpCas9	DNA-stable	High	No
107	6	10.3389/fpls.2017.01598	2	No	SpCas9	DNA-stable	High	No
107	6	10.3389/fpls.2017.01598	≥4	No	SpCas9	DNA-stable	High	No
108		10.1111/pbi.12922	≥4	No	SpCas9	DNA-stable	High	No
111		10.3389/fpls.2017.01910	2	No	SpCas9	DNA-stable	High	No
112	1	10.1111/pbi.12857	≥4	No	SpCas9	DNA-stable	Low	No
112	1	10.1111/pbi.12857	≥4	No	SpCas9	DNA-stable	Low	No
112	1	10.1111/pbi.12857	≥4	No	SpCas9	DNA-stable	Low	No
112	2	10.1111/pbi.12857	3	No	SpCas9	DNA-stable	Low	No
112	2	10.1111/pbi.12857	≥4	No	SpCas9	DNA-stable	Low	No
112	2	10.1111/pbi.12857	≥4	No	SpCas9	DNA-stable	Low	No
112	2	10.1111/pbi.12857	≥4	No	SpCas9	DNA-stable	Low	No
112	3	10.1111/pbi.12857	2	No	SpCas9	DNA-stable	Low	No
112	3	10.1111/pbi.12857	2	No	SpCas9	DNA-stable	Low	No
112	3	10.1111/pbi.12857	3	No	SpCas9	DNA-stable	Low	No
112	3	10.1111/pbi.12857	3	No	SpCas9	DNA-stable	Low	No
112	3	10.1111/pbi.12857	≥4	No	SpCas9	DNA-stable	Low	No
112	3	10.1111/pbi.12857	≥4	No	SpCas9	DNA-stable	Low	No
112	3	10.1111/pbi.12857	≥4	No	SpCas9	DNA-stable	Low	No
112	3	10.1111/pbi.12857	≥4	No	SpCas9	DNA-stable	Low	No
112	3	10.1111/pbi.12857	≥4	No	SpCas9	DNA-stable	Low	No
112	3	10.1111/pbi.12857	≥4	No	SpCas9	DNA-stable	Low	No
113	2	10.3389/fpls.2017.01730	≥4	No	SpCas9	DNA-stable	High	No
114		10.1016/j.molp.2017.09.005	≥4	No	SpCas9	DNA-stable	Low	No
115		10.1093/jxb/erx457	≥4	No	SpCas9	Others	High	No
120	2	10.1016/j.molp.2017.06.006	3	No	SpCas9	DNA-stable	High	No
120	2	10.1016/j.molp.2017.06.006	3	No	SpCas9	DNA-stable	High	No
121		10.1371/journal.pone.0177966	3	No	SpCas9	DNA-stable	High	No
121		10.1371/journal.pone.0177966	2	No	SpCas9	DNA-stable	High	No
122	1	10.1111/tpj.13632	≥4	No	SpCas9	DNA-stable	High	No
125	1	10.1007/s11427-017-9008-8	≥4	No	SpCas9	DNA-stable	High	No
125	2	10.1007/s11427-017-9008-8	2	No	SpCas9	DNA-stable	High	Yes
125	3	10.1007/s11427-017-9008-8	≥4	No	SpCas9	DNA-stable	High	Yes
126	1	10.1038/s41598-017-14832-9	≥4	No	SpCas9	DNA-stable	High	No
126	2	10.1038/s41598-017-14832-9	≥4	No	SpCas9	DNA-stable	High	No
129		10.3864/j.issn.0578-1752.2017.15.002	≥4	No	SpCas9	DNA-stable	High	No
129		10.3864/j.issn.0578-1752.2017.15.002	≥4	No	SpCas9	DNA-stable	High	No
129		10.3864/j.issn.0578-1752.2017.15.002	3	No	SpCas9	DNA-stable	High	No
129		10.3864/j.issn.0578-1752.2017.15.002	3	No	SpCas9	DNA-stable	High	No
130	1	10.1021/acs.jafc.7b02745	≥4	No	SpCas9	DNA-stable	High	No
131	1	10.1104/pp.17.01265	≥4	No	SpCas9	DNA-stable	High	No
131	1	10.1104/pp.17.01265	≥4	No	SpCas9	DNA-stable	High	No
131	2	10.1104/pp.17.01265	≥4	No	SpCas9	DNA-stable	High	No
131	3	10.1104/pp.17.01265	≥4	No	SpCas9	DNA-stable	High	No
131	3	10.1104/pp.17.01265	3	No	SpCas9	DNA-stable	High	No
133		10.1186/s12896-019-0501-2	2	No	SpCas9	DNA-stable	High	No
133		10.1186/s12896-019-0501-2	≥4	No	SpCas9	DNA-stable	High	No
134	1	10.1126/sciadv.aat6086	≥4	No	SpCas9	DNA-stable	High	No
134	2	10.1126/sciadv.aat6086	≥4	No	SpCas9	DNA-stable	Low	No
134	2	10.1126/sciadv.aat6086	≥4	No	SpCas9	DNA-stable	Low	No
135	2	10.3389/fpls.2019.00040	1	No	SpCas9	DNA-stable	High	Yes
136		10.3389/fpls.2018.01180	1	No	SpCas9	DNA-stable	High	Yes
136		10.3389/fpls.2018.01180	3	No	SpCas9	DNA-stable	High	No
137		10.1007/s00299-019-02373-6	3	No	SpCas9	DNA-stable	Low	No
137		10.1007/s00299-019-02373-6	≥4	No	SpCas9	DNA-stable	Low	No
139	1	10.1007/s00299-019-02378-1	3	No	SpCas9	DNA-stable	High	No
139	3	10.1007/s00299-019-02378-1	≥4	No	SpCas9	DNA-stable	High	No
141	1	10.1038/s41438-018-0111-5	3	No	SpCas9	DNA-stable	High	No
141	2	10.1038/s41438-018-0111-5	≥4	No	SpCas9	DNA-stable	High	No
142	1	10.1111/pbi.12987	3	No	SpCas9	DNA-stable	High	No
142	1	10.1111/pbi.12987	≥4	No	SpCas9	DNA-stable	High	No
142	1	10.1111/pbi.12987	≥4	No	SpCas9	DNA-stable	High	No
142	2	10.1111/pbi.12987	2	No	SpCas9	DNA-stable	High	No
142	2	10.1111/pbi.12987	3	No	SpCas9	DNA-stable	High	No
142	2	10.1111/pbi.12987	3	No	SpCas9	DNA-stable	High	No
143	2	10.3390/agronomy8120290	2	No	SpCas9	DNA-stable	High	No
143	2	10.3390/agronomy8120290	2	No	SpCas9	DNA-stable	High	No
143	4	10.3390/agronomy8120290	3	No	SpCas9	DNA-stable	High	No
143	4	10.3390/agronomy8120290	3	No	SpCas9	DNA-stable	High	No
147	2	10.1186/s13059-018-1580-4	≥4	No	SpCas9	DNA-stable	Low	No
147	2	10.1186/s13059-018-1580-4	≥4	No	SpCas9	DNA-stable	Low	No
147	2	10.1186/s13059-018-1580-4	≥4	No	SpCas9	DNA-stable	Low	No
148	1	10.1093/jxb/erz074	≥4	No	SpCas9	DNA-stable	High	No
149	1	10.1111/pbi.12982	3	No	SpCas9	DNA-stable	Low	No
149	2	10.1111/pbi.12982	≥4	No	SpCas9	DNA-stable	High	No
150	1	10.1111/pbi.13020	3	No	SpCas9	DNA-stable	Low	No
150	1	10.1111/pbi.13020	3	No	SpCas9	DNA-stable	Low	No
150	1	10.1111/pbi.13020	3	No	SpCas9	DNA-stable	Low	No
150	1	10.1111/pbi.13020	3	No	SpCas9	DNA-stable	Low	No
150	3	10.1111/pbi.13020	3	No	SpCas9	DNA-stable	High	No
150	4	10.1111/pbi.13020	2	No	SpCas9	DNA-stable	High	Yes
150	5	10.1111/pbi.13020	2	No	SpCas9	DNA-stable	High	Yes
150	6	10.1111/pbi.13020	3	No	SpCas9	DNA-stable	Low	No
151	2	10.1186/s12870-018-1627-4	≥4	No	SpCas9	DNA-stable	Low	No
152	1	10.1021/acs.jafc.8b02177	3	No	SpCas9	DNA-stable	High	No
152	1	10.1021/acs.jafc.8b02177	≥4	No	SpCas9	DNA-stable	High	No
152	1	10.1021/acs.jafc.8b02177	≥4	No	SpCas9	DNA-stable	High	No
154	1	10.1038/nbt.4273	3	No	SpCas9	DNA-stable	Low	No
154	3	10.1038/nbt.4273	3	No	SpCas9	DNA-stable	Low	No
154	3	10.1038/nbt.4273	3	No	SpCas9	DNA-stable	Low	No
154	3	10.1038/nbt.4273	≥4	No	SpCas9	DNA-stable	Low	No
154	5	10.1038/nbt.4273	3	No	SpCas9	DNA-stable	Low	No
154	5	10.1038/nbt.4273	≥4	No	SpCas9	DNA-stable	Low	No
154	6	10.1038/nbt.4273	2	No	SpCas9	DNA-stable	Low	No
154	6	10.1038/nbt.4273	≥4	No	SpCas9	DNA-stable	Low	No
155	1	10.1038/s41438-018-0107-1	1	No	SpCas9	DNA-stable	Low	Yes
155	2	10.1038/s41438-018-0107-1	1	No	SpCas9	DNA-stable	Low	Yes
155	4	10.1038/s41438-018-0107-1	2	No	SpCas9	DNA-stable	Low	No
157	3	10.1093/treephys/tpy088	2	No	SpCas9	DNA-stable	Low	No
161	1	10.1371/journal.pone.0211598	1	No	Others	Others	Low	No
161	2	10.1371/journal.pone.0211598	1	No	Others	Others	High	Yes
161	4	10.1371/journal.pone.0211598	1	No	Others	Others	Low	Yes
161	5	10.1371/journal.pone.0211598	1	No	Others	Others	Low	No
161	6	10.1371/journal.pone.0211598	1	No	Others	Others	Low	No
161	7	10.1371/journal.pone.0211598	1	No	Others	Others	Low	Yes
161	8	10.1371/journal.pone.0211598	1	No	Others	Others	High	Yes
161	9	10.1371/journal.pone.0211598	1	No	Others	Others	High	Yes
161	14	10.1371/journal.pone.0211598	1	No	Others	Others	Low	Yes
161	15	10.1371/journal.pone.0211598	1	No	Others	Others	Low	Yes
161	18	10.1371/journal.pone.0211598	1	No	Others	Others	High	Yes
161	22	10.1371/journal.pone.0211598	1	No	Others	Others	Low	Yes
161	23	10.1371/journal.pone.0211598	1	No	Others	Others	High	Yes
161	24	10.1371/journal.pone.0211598	1	No	Others	Others	Low	Yes
161	25	10.1371/journal.pone.0211598	1	No	SpCas9	Others	Low	Yes
161	26	10.1371/journal.pone.0211598	1	No	SpCas9	Others	Low	Yes
161	27	10.1371/journal.pone.0211598	1	No	SpCas9	Others	High	Yes
161	28	10.1371/journal.pone.0211598	1	No	SpCas9	Others	High	Yes
161	29	10.1371/journal.pone.0211598	1	No	SpCas9	Others	High	Yes
161	30	10.1371/journal.pone.0211598	1	No	SpCas9	Others	High	Yes
161	31	10.1371/journal.pone.0211598	1	No	SpCas9	Others	High	Yes
161	32	10.1371/journal.pone.0211598	1	No	SpCas9	Others	High	Yes
161	35	10.1371/journal.pone.0211598	1	No	Others	Others	High	No
161	36	10.1371/journal.pone.0211598	1	No	Others	Others	High	Yes
161	37	10.1371/journal.pone.0211598	1	No	Others	Others	High	Yes
161	41	10.1371/journal.pone.0211598	1	No	SpCas9	Others	Low	Yes
161	41	10.1371/journal.pone.0211598	1	No	SpCas9	Others	Low	Yes
161	42	10.1371/journal.pone.0211598	1	No	Others	Others	Low	Yes
161	42	10.1371/journal.pone.0211598	1	No	Others	Others	Low	Yes
161	43	10.1371/journal.pone.0211598	1	No	Others	Others	Low	Yes
161	43	10.1371/journal.pone.0211598	1	No	Others	Others	Low	Yes
161	44	10.1371/journal.pone.0211598	1	No	Others	Others	Low	Yes
161	44	10.1371/journal.pone.0211598	1	No	Others	Others	Low	Yes
161	45	10.1371/journal.pone.0211598	1	No	Others	Others	Low	No
161	45	10.1371/journal.pone.0211598	1	No	Others	Others	Low	No
164		10.1038/s41598-018-34884-9	3	No	SpCas9	DNA-stable	Low	No
164		10.1038/s41598-018-34884-9	≥4	No	SpCas9	DNA-stable	Low	No
165	1	10.1111/tpj.14141	≥4	No	SpCas9	DNA-stable	High	No
165	2	10.1111/tpj.14141	≥4	No	SpCas9	DNA-stable	High	No
165	2	10.1111/tpj.14141	≥4	No	SpCas9	DNA-stable	High	No
165	2	10.1111/tpj.14141	≥4	No	SpCas9	DNA-stable	High	No
165	2	10.1111/tpj.14141	≥4	No	SpCas9	DNA-stable	High	No
165	2	10.1111/tpj.14141	≥4	No	SpCas9	DNA-stable	High	No
167	2	10.3389/fpls.2018.01533	≥4	No	SpCas9	DNA-stable	High	No
167	2	10.3389/fpls.2018.01533	≥4	No	SpCas9	DNA-stable	High	No
167	3	10.3389/fpls.2018.01533	3	No	SpCas9	DNA-stable	High	No
168	9	10.1186/s13059-018-1458-5	1	No	SpCas9	DNA-stable	High	Yes
168	9	10.1186/s13059-018-1458-5	1	No	SpCas9	DNA-stable	High	Yes
168	9	10.1186/s13059-018-1458-5	1	No	SpCas9	DNA-stable	High	Yes
168	9	10.1186/s13059-018-1458-5	1	No	SpCas9	DNA-stable	High	Yes
168	9	10.1186/s13059-018-1458-5	2	No	SpCas9	DNA-stable	High	Yes
169	2	10.1038/s42003-019-0288-7	3	No	SpCas9	DNA-stable	High	Yes
169	2	10.1038/s42003-019-0288-7	≥4	No	SpCas9	DNA-stable	High	No
171	1	10.1038/nbt.4202	≥4	No	SpCas9	DNA-stable	Low	No
171	3	10.1038/nbt.4202	≥4	No	SpCas9	DNA-stable	High	No
171	3	10.1038/nbt.4202	≥4	No	SpCas9	DNA-stable	High	No
171	4	10.1038/nbt.4202	2	No	SpCas9	DNA-stable	Low	No
171	4	10.1038/nbt.4202	3	No	SpCas9	DNA-stable	Low	No
171	4	10.1038/nbt.4202	3	No	SpCas9	DNA-stable	Low	No
173		10.1111/pbi.13088	3	No	SpCas9	DNA-stable	High	No
174		10.3389/fpls.2018.00842.s001	1	No	SpCas9	DNA-stable	Low	No
174		10.3389/fpls.2018.00842.s001	1	No	SpCas9	DNA-stable	Low	No
174		10.3389/fpls.2018.00842.s001	1	No	SpCas9	DNA-stable	Low	No
174		10.3389/fpls.2018.00842.s001	2	No	SpCas9	DNA-stable	Low	No
175	1	10.1007/s00299-018-2340-3	≥4	No	SpCas9	DNA-stable	High	No
175	2	10.1007/s00299-018-2340-3	≥4	No	SpCas9	DNA-stable	High	No
175	2	10.1007/s00299-018-2340-3	3	No	SpCas9	DNA-stable	High	No
178	1	10.1038/nbt.4272	≥4	No	SpCas9	DNA-stable	High	No
178	1	10.1038/nbt.4272	3	No	SpCas9	DNA-stable	High	No
178	2	10.1038/nbt.4272	3	No	SpCas9	DNA-stable	Low	No
178	2	10.1038/nbt.4272	3	No	SpCas9	DNA-stable	Low	No
178	4	10.1038/nbt.4272	3	No	SpCas9	DNA-stable	High	No
179	1	10.1038/s41477-018-0321-8	1	No	SpCas9	DNA-stable	Low	Yes
179	1	10.1038/s41477-018-0321-8	1	No	SpCas9	DNA-stable	Low	Yes
179	2	10.1038/s41477-018-0321-8	1	No	Others	DNA-stable	High	Yes
179	2	10.1038/s41477-018-0321-8	1	No	Others	DNA-stable	High	No
179	2	10.1038/s41477-018-0321-8	1	No	Others	DNA-stable	High	No
179	2	10.1038/s41477-018-0321-8	1	No	Others	DNA-stable	High	No
179	2	10.1038/s41477-018-0321-8	1	No	Others	DNA-stable	Low	No
179	2	10.1038/s41477-018-0321-8	1	No	Others	DNA-stable	High	No
179	2	10.1038/s41477-018-0321-8	1	No	Others	DNA-stable	Low	No
4	3	10.1111/pbi.12758	≥4	Yes	SpCas9	DNA-stable	Low	No
5		10.1111/mpp.12375	≥4	Yes	SpCas9	DNA-stable	High	No
5		10.1111/mpp.12375	≥4	Yes	SpCas9	DNA-stable	High	No
5		10.1111/mpp.12375	≥4	Yes	SpCas9	DNA-stable	High	No
5		10.1111/mpp.12375	≥4	Yes	SpCas9	DNA-stable	High	No
5		10.1111/mpp.12375	≥4	Yes	SpCas9	DNA-stable	High	No
6	1	10.1038/srep44304	≥4	Yes	SpCas9	DNA-stable	High	No
6	1	10.1038/srep44304	≥4	Yes	SpCas9	DNA-stable	High	No
6	1	10.1038/srep44304	≥4	Yes	SpCas9	DNA-stable	High	No
6	1	10.1038/srep44304	≥4	Yes	SpCas9	DNA-stable	High	No
6	1	10.1038/srep44304	3	Yes	SpCas9	DNA-stable	High	No
6	1	10.1038/srep44304	3	Yes	SpCas9	DNA-stable	High	No
6	2	10.1038/srep44304	≥4	Yes	SpCas9	DNA-stable	Low	No
6	2	10.1038/srep44304	≥4	Yes	SpCas9	DNA-stable	Low	No
6	2	10.1038/srep44304	≥4	Yes	SpCas9	DNA-stable	Low	No
6	2	10.1038/srep44304	≥4	Yes	SpCas9	DNA-stable	Low	No
6	2	10.1038/srep44304	≥4	Yes	SpCas9	DNA-stable	Low	No
6	2	10.1038/srep44304	3	Yes	SpCas9	DNA-stable	Low	No
6	2	10.1038/srep44304	3	Yes	SpCas9	DNA-stable	Low	No
6	2	10.1038/srep44304	2	Yes	SpCas9	DNA-stable	Low	No
7	1	10.1111/pbi.12596	≥4	Yes	SpCas9	DNA-stable	Low	No
7	1	10.1111/pbi.12596	≥4	Yes	SpCas9	DNA-stable	Low	No
7	1	10.1111/pbi.12596	≥4	Yes	SpCas9	DNA-stable	Low	No
7	1	10.1111/pbi.12596	≥4	Yes	SpCas9	DNA-stable	Low	No
7	1	10.1111/pbi.12596	≥4	Yes	SpCas9	DNA-stable	Low	No
7	1	10.1111/pbi.12596	≥4	Yes	SpCas9	DNA-stable	Low	No
7	1	10.1111/pbi.12596	≥4	Yes	SpCas9	DNA-stable	Low	No
7	1	10.1111/pbi.12596	≥4	Yes	SpCas9	DNA-stable	Low	No
7	1	10.1111/pbi.12596	3	Yes	SpCas9	DNA-stable	Low	No
7	2	10.1111/pbi.12596	≥4	Yes	SpCas9	DNA-stable	High	No
7	2	10.1111/pbi.12596	≥4	Yes	SpCas9	DNA-stable	High	No
7	2	10.1111/pbi.12596	≥4	Yes	SpCas9	DNA-stable	High	No
8	1	10.1038/srep38169	1	Yes	Others	DNA-stable	Low	Yes
9		10.1093/pcp/pcu154	3	Yes	SpCas9	DNA-stable	High	No
9		10.1093/pcp/pcu154	3	Yes	SpCas9	DNA-stable	High	No
11	2	10.1073/pnas.1400822111	≥4	Yes	SpCas9	DNA-stable	Low	No
11	2	10.1073/pnas.1400822111	2	Yes	SpCas9	DNA-stable	Low	No
11	2	10.1073/pnas.1400822111	2	Yes	SpCas9	DNA-stable	Low	No
14	1	10.1016/j.molp.2016.03.003	2	Yes	Others	DNA-stable	High	No
14	2	10.1016/j.molp.2016.03.003	2	Yes	Others	DNA-stable	High	No
14	2	10.1016/j.molp.2016.03.003	3	Yes	Others	DNA-stable	High	No
16	1	10.1007/s00425-014-2180-5	3	Yes	SpCas9	DNA-stable	Low	No
16	1	10.1007/s00425-014-2180-5	3	Yes	SpCas9	DNA-stable	Low	No
17		10.1007/s11032-016-0591-7	3	Yes	SpCas9	DNA-stable	High	No
18	1	10.1186/s12896-015-0131-2	3	Yes	SpCas9	DNA-stable	Low	No
18	2	10.1186/s12896-015-0131-2	≥4	Yes	SpCas9	DNA-stable	High	No
18	3	10.1186/s12896-015-0131-2	2	Yes	SpCas9	DNA-stable	High	Yes
19		10.1111/pbi.12495	≥4	Yes	SpCas9	DNA-stable	Low	No
19		10.1111/pbi.12495	≥4	Yes	SpCas9	DNA-stable	Low	No
19		10.1111/pbi.12495	≥4	Yes	SpCas9	DNA-stable	Low	No
21		10.1111/pbi.12677	≥4	Yes	SpCas9	DNA-stable	High	No
21		10.1111/pbi.12677	≥4	Yes	SpCas9	DNA-stable	High	No
21		10.1111/pbi.12677	≥4	Yes	SpCas9	DNA-stable	High	No
21		10.1111/pbi.12677	≥4	Yes	SpCas9	DNA-stable	High	No
21		10.1111/pbi.12677	≥4	Yes	SpCas9	DNA-stable	High	No
21		10.1111/pbi.12677	≥4	Yes	SpCas9	DNA-stable	High	No
23		10.1038/srep26871	≥4	Yes	Others	DNA-stable	High	No
23		10.1038/srep26871	2	Yes	Others	DNA-stable	High	No
26	2	10.1038/srep43902	≥4	Yes	SpCas9	DNA-stable	High	No
27	1	10.1038/nplants.2016.139	≥4	Yes	SpCas9	DNA-stable	Low	No
27	1	10.1038/nplants.2016.139	≥4	Yes	SpCas9	DNA-stable	Low	No
27	1	10.1038/nplants.2016.139	≥4	Yes	SpCas9	DNA-stable	Low	No
27	1	10.1038/nplants.2016.139	≥4	Yes	SpCas9	DNA-stable	Low	No
27	1	10.1038/nplants.2016.139	≥4	Yes	SpCas9	DNA-stable	Low	No
28	2	10.3389/fpls.2016.00377	1	Yes	SpCas9	DNA-stable	High	Yes
28	4	10.3389/fpls.2016.00377	≥4	Yes	SpCas9	DNA-stable	High	No
29	3	10.1038/ncomms14261	2	Yes	SpCas9	Others	High	No
29	3	10.1038/ncomms14261	3	Yes	SpCas9	Others	High	No
29	3	10.1038/ncomms14261	3	Yes	SpCas9	Others	High	No
29	3	10.1038/ncomms14261	3	Yes	SpCas9	Others	High	No
29	3	10.1038/ncomms14261	3	Yes	SpCas9	Others	High	No
29	3	10.1038/ncomms14261	3	Yes	SpCas9	Others	High	No
29	3	10.1038/ncomms14261	3	Yes	SpCas9	Others	High	No
29	3	10.1038/ncomms14261	3	Yes	SpCas9	Others	High	No
29	3	10.1038/ncomms14261	≥4	Yes	SpCas9	Others	High	No
29	3	10.1038/ncomms14261	≥4	Yes	SpCas9	Others	High	No
29	3	10.1038/ncomms14261	≥4	Yes	SpCas9	Others	High	No
29	3	10.1038/ncomms14261	≥4	Yes	SpCas9	Others	High	No
29	3	10.1038/ncomms14261	≥4	Yes	SpCas9	Others	High	No
30	1	10.1534/g3.116.033266	≥4	Yes	SpCas9	DNA-stable	High	No
30	1	10.1534/g3.116.033266	≥4	Yes	SpCas9	DNA-stable	High	No
30	1	10.1534/g3.116.033266	≥4	Yes	SpCas9	DNA-stable	High	No
30	1	10.1534/g3.116.033266	≥4	Yes	SpCas9	DNA-stable	High	No
30	1	10.1534/g3.116.033266	≥4	Yes	SpCas9	DNA-stable	High	No
30	1	10.1534/g3.116.033266	≥4	Yes	SpCas9	DNA-stable	High	No
30	1	10.1534/g3.116.033266	≥4	Yes	SpCas9	DNA-stable	High	No
30	1	10.1534/g3.116.033266	≥4	Yes	SpCas9	DNA-stable	High	No
30	1	10.1534/g3.116.033266	≥4	Yes	SpCas9	DNA-stable	High	No
30	1	10.1534/g3.116.033266	≥4	Yes	SpCas9	DNA-stable	High	No
30	1	10.1534/g3.116.033266	≥4	Yes	SpCas9	DNA-stable	High	No
30	2	10.1534/g3.116.033266	≥4	Yes	SpCas9	DNA-stable	High	No
30	2	10.1534/g3.116.033266	≥4	Yes	SpCas9	DNA-stable	High	No
30	2	10.1534/g3.116.033266	≥4	Yes	SpCas9	DNA-stable	High	No
30	2	10.1534/g3.116.033266	≥4	Yes	SpCas9	DNA-stable	High	No
30	3	10.1534/g3.116.033266	≥4	Yes	SpCas9	DNA-stable	High	No
30	3	10.1534/g3.116.033266	≥4	Yes	SpCas9	DNA-stable	High	No
30	3	10.1534/g3.116.033266	3	Yes	SpCas9	DNA-stable	High	No
30	4	10.1534/g3.116.033266	≥4	Yes	SpCas9	DNA-stable	High	No
30	4	10.1534/g3.116.033266	≥4	Yes	SpCas9	DNA-stable	High	No
30	4	10.1534/g3.116.033266	≥4	Yes	SpCas9	DNA-stable	High	No
30	4	10.1534/g3.116.033266	3	Yes	SpCas9	DNA-stable	High	No
30	4	10.1534/g3.116.033266	2	Yes	SpCas9	DNA-stable	High	No
30	5	10.1534/g3.116.033266	≥4	Yes	SpCas9	DNA-stable	High	No
30	5	10.1534/g3.116.033266	≥4	Yes	SpCas9	DNA-stable	High	No
30	5	10.1534/g3.116.033266	2	Yes	SpCas9	DNA-stable	High	No
30	6	10.1534/g3.116.033266	≥4	Yes	SpCas9	DNA-stable	High	No
30	7	10.1534/g3.116.033266	≥4	Yes	SpCas9	DNA-stable	High	No
30	7	10.1534/g3.116.033266	≥4	Yes	SpCas9	DNA-stable	High	No
30	8	10.1534/g3.116.033266	≥4	Yes	SpCas9	DNA-stable	Low	No
30	8	10.1534/g3.116.033266	≥4	Yes	SpCas9	DNA-stable	Low	No
30	8	10.1534/g3.116.033266	≥4	Yes	SpCas9	DNA-stable	Low	No
31		10.1007/s00299-016-2069-9	≥4	Yes	SpCas9	DNA-stable	High	No
31		10.1007/s00299-016-2069-9	≥4	Yes	SpCas9	DNA-stable	High	No
33		10.1038/nbt.2655	≥4	Yes	SpCas9	Others	Low	No
34	1	10.1093/pcp/pcw173	≥4	Yes	SpCas9	DNA-stable	High	No
34	1	10.1093/pcp/pcw173	≥4	Yes	SpCas9	DNA-stable	High	No
34	2	10.1093/pcp/pcw173	3	Yes	SpCas9	DNA-stable	Low	No
34	2	10.1093/pcp/pcw173	2	Yes	SpCas9	DNA-stable	Low	No
35	1	10.1038/srep26685	3	Yes	Others	DNA-stable	Low	No
35	1	10.1038/srep26685	2	Yes	Others	DNA-stable	Low	No
35	2	10.1038/srep26685	3	Yes	Others	DNA-stable	High	No
35	2	10.1038/srep26685	2	Yes	Others	DNA-stable	High	No
36	1	10.1038/srep24765	≥4	Yes	SpCas9	DNA-stable	Low	No
36	1	10.1038/srep24765	3	Yes	SpCas9	DNA-stable	Low	No
36	1	10.1038/srep24765	3	Yes	SpCas9	DNA-stable	Low	No
36	2	10.1038/srep24765	≥4	Yes	SpCas9	DNA-stable	High	No
36	2	10.1038/srep24765	≥4	Yes	SpCas9	DNA-stable	High	No
36	2	10.1038/srep24765	3	Yes	SpCas9	DNA-stable	High	No
36	3	10.1038/srep24765	3	Yes	SpCas9	DNA-stable	High	No
36	3	10.1038/srep24765	3	Yes	SpCas9	DNA-stable	High	No
37	2	10.1371/journal.pone.0162169	3	Yes	SpCas9	DNA-stable	Low	No
37	2	10.1371/journal.pone.0162169	3	Yes	SpCas9	DNA-stable	Low	No
37	4	10.1371/journal.pone.0162169	3	Yes	SpCas9	DNA-stable	High	No
37	4	10.1371/journal.pone.0162169	3	Yes	SpCas9	DNA-stable	High	No
37	4	10.1371/journal.pone.0162169	3	Yes	SpCas9	DNA-stable	High	No
37	4	10.1371/journal.pone.0162169	3	Yes	SpCas9	DNA-stable	High	No
37	4	10.1371/journal.pone.0162169	3	Yes	SpCas9	DNA-stable	High	No
37	4	10.1371/journal.pone.0162169	3	Yes	SpCas9	DNA-stable	High	No
37	5	10.1371/journal.pone.0162169	3	Yes	SpCas9	DNA-stable	Low	No
37	6	10.1371/journal.pone.0162169	3	Yes	SpCas9	DNA-stable	Low	No
37	6	10.1371/journal.pone.0162169	3	Yes	SpCas9	DNA-stable	Low	No
37	7	10.1371/journal.pone.0162169	3	Yes	SpCas9	DNA-stable	Low	No
37	7	10.1371/journal.pone.0162169	3	Yes	SpCas9	DNA-stable	Low	No
37	8	10.1371/journal.pone.0162169	3	Yes	SpCas9	DNA-stable	Low	No
37	8	10.1371/journal.pone.0162169	3	Yes	SpCas9	DNA-stable	Low	No
37	8	10.1371/journal.pone.0162169	3	Yes	SpCas9	DNA-stable	Low	No
37	8	10.1371/journal.pone.0162169	3	Yes	SpCas9	DNA-stable	Low	No
37	10	10.1371/journal.pone.0162169	3	Yes	SpCas9	DNA-stable	Low	No
37	10	10.1371/journal.pone.0162169	3	Yes	SpCas9	DNA-stable	Low	No
37	11	10.1371/journal.pone.0162169	3	Yes	SpCas9	DNA-stable	Low	No
37	12	10.1371/journal.pone.0162169	3	Yes	SpCas9	DNA-stable	Low	No
37	12	10.1371/journal.pone.0162169	3	Yes	SpCas9	DNA-stable	Low	No
38	1	10.1038/srep32289	≥4	Yes	SpCas9	DNA-stable	High	No
39	1	10.1104/pp.15.01696	≥4	Yes	SpCas9	Others	High	No
39	1	10.1104/pp.15.01696	≥4	Yes	SpCas9	Others	High	No
39	1	10.1104/pp.15.01696	≥4	Yes	SpCas9	Others	High	No
39	1	10.1104/pp.15.01696	≥4	Yes	SpCas9	Others	High	No
39	1	10.1104/pp.15.01696	≥4	Yes	SpCas9	Others	High	Yes
39	2	10.1104/pp.15.01696	≥4	Yes	SpCas9	Others	High	No
39	2	10.1104/pp.15.01696	≥4	Yes	SpCas9	Others	High	No
39	2	10.1104/pp.15.01696	≥4	Yes	SpCas9	Others	High	No
39	2	10.1104/pp.15.01696	≥4	Yes	SpCas9	Others	High	No
40	1	10.1038/nbt.2650	3	Yes	SpCas9	DNA-stable	High	No
40	2	10.1038/nbt.2650	1	Yes	SpCas9	DNA-stable	High	No
43	1	10.3389/fpls.2017.00298	3	Yes	SpCas9	DNA-stable	High	No
43	1	10.3389/fpls.2017.00298	3	Yes	SpCas9	DNA-stable	High	No
43	1	10.3389/fpls.2017.00298	2	Yes	SpCas9	DNA-stable	High	No
43	2	10.3389/fpls.2017.00298	3	Yes	SpCas9	DNA-stable	Low	No
45	1	10.1016/j.molp.2016.05.001	3	Yes	SpCas9	DNA-stable	High	No
45	2	10.1016/j.molp.2016.05.001	≥4	Yes	SpCas9	DNA-stable	Low	No
45	2	10.1016/j.molp.2016.05.001	3	Yes	SpCas9	DNA-stable	Low	No
45	2	10.1016/j.molp.2016.05.001	3	Yes	SpCas9	DNA-stable	Low	No
45	2	10.1016/j.molp.2016.05.001	2	Yes	SpCas9	DNA-stable	Low	No
47		10.1534/g3.113.008847	1	Yes	SpCas9	Others	High	No
47		10.1534/g3.113.008847	1	Yes	SpCas9	Others	High	No
47		10.1534/g3.113.008847	2	Yes	SpCas9	Others	High	No
47		10.1534/g3.113.008847	2	Yes	SpCas9	Others	High	No
47		10.1534/g3.113.008847	2	Yes	SpCas9	Others	High	No
47		10.1534/g3.113.008847	2	Yes	SpCas9	Others	High	No
47		10.1534/g3.113.008847	3	Yes	SpCas9	Others	High	No
47		10.1534/g3.113.008847	≥4	Yes	SpCas9	Others	High	No
47		10.1534/g3.113.008847	≥4	Yes	SpCas9	Others	High	No
48		10.3389/fpls.2016.01899	≥4	Yes	SpCas9	DNA-stable	High	No
48		10.3389/fpls.2016.01899	≥4	Yes	SpCas9	DNA-stable	High	No
48		10.3389/fpls.2016.01899	≥4	Yes	SpCas9	DNA-stable	High	No
48		10.3389/fpls.2016.01899	≥4	Yes	SpCas9	DNA-stable	High	No
48		10.3389/fpls.2016.01899	≥4	Yes	SpCas9	DNA-stable	High	No
49	1	10.1016/j.molp.2017.03.001	≥4	Yes	Others	DNA-stable	High	No
49	2	10.1016/j.molp.2017.03.001	≥4	Yes	Others	DNA-stable	High	No
49	2	10.1016/j.molp.2017.03.001	≥4	Yes	Others	DNA-stable	High	No
49	3	10.1016/j.molp.2017.03.001	≥4	Yes	Others	DNA-stable	High	No
49	3	10.1016/j.molp.2017.03.001	≥4	Yes	Others	DNA-stable	High	No
49	4	10.1016/j.molp.2017.03.001	≥4	Yes	Others	DNA-stable	High	No
49	4	10.1016/j.molp.2017.03.001	≥4	Yes	Others	DNA-stable	High	No
49	5	10.1016/j.molp.2017.03.001	≥4	Yes	Others	DNA-stable	Low	No
49	6	10.1016/j.molp.2017.03.001	≥4	Yes	Others	DNA-stable	Low	No
49	6	10.1016/j.molp.2017.03.001	≥4	Yes	Others	DNA-stable	Low	No
49	6	10.1016/j.molp.2017.03.001	≥4	Yes	Others	DNA-stable	Low	No
49	7	10.1016/j.molp.2017.03.001	≥4	Yes	Others	DNA-stable	High	No
49	7	10.1016/j.molp.2017.03.001	≥4	Yes	Others	DNA-stable	High	No
49	7	10.1016/j.molp.2017.03.001	3	Yes	Others	DNA-stable	High	No
49	8	10.1016/j.molp.2017.03.001	≥4	Yes	Others	DNA-stable	High	No
49	8	10.1016/j.molp.2017.03.001	3	Yes	Others	DNA-stable	High	No
51		10.1186/s13059-015-0715-0	3	Yes	SpCas9	DNA-stable	Low	No
51		10.1186/s13059-015-0715-0	3	Yes	SpCas9	DNA-stable	Low	No
52	1	10.1038/nbt.3389	≥4	Yes	SpCas9	Others	High	No
52	1	10.1038/nbt.3389	≥4	Yes	SpCas9	Others	High	No
52	1	10.1038/nbt.3389	≥4	Yes	SpCas9	Others	High	No
52	1	10.1038/nbt.3389	≥4	Yes	SpCas9	Others	High	No
52	1	10.1038/nbt.3389	3	Yes	SpCas9	Others	High	No
52	2	10.1038/nbt.3389	≥4	Yes	SpCas9	Others	Low	No
52	2	10.1038/nbt.3389	≥4	Yes	SpCas9	Others	Low	No
52	2	10.1038/nbt.3389	2	Yes	SpCas9	Others	Low	No
52	3	10.1038/nbt.3389	≥4	Yes	SpCas9	Others	High	No
52	3	10.1038/nbt.3389	≥4	Yes	SpCas9	Others	High	No
52	3	10.1038/nbt.3389	≥4	Yes	SpCas9	Others	High	No
52	4	10.1038/nbt.3389	3	Yes	SpCas9	Others	Low	No
53		10.1093/mp/sst119	3	Yes	SpCas9	Others	High	No
54	2	10.1038/srep11491	≥4	Yes	SpCas9	DNA-stable	High	No
54	2	10.1038/srep11491	3	Yes	SpCas9	DNA-stable	High	No
54	3	10.1038/srep11491	≥4	Yes	SpCas9	DNA-stable	High	No
54	3	10.1038/srep11491	3	Yes	SpCas9	DNA-stable	High	No
54	4	10.1038/srep11491	2	Yes	SpCas9	DNA-stable	High	No
54	4	10.1038/srep11491	3	Yes	SpCas9	DNA-stable	High	No
57		10.1038/srep41993	2	Yes	SpCas9	DNA-stable	High	No
58	1	10.1111/pbi.12200	≥4	Yes	SpCas9	DNA-stable	High	No
58	1	10.1111/pbi.12200	3	Yes	SpCas9	DNA-stable	High	No
58	1	10.1111/pbi.12200	3	Yes	SpCas9	DNA-stable	High	No
58	2	10.1111/pbi.12200	3	Yes	SpCas9	DNA-stable	High	No
58	3	10.1111/pbi.12200	≥4	Yes	SpCas9	DNA-stable	High	No
58	3	10.1111/pbi.12200	≥4	Yes	SpCas9	DNA-stable	High	No
59	3	10.1038/ncomms12617	3	Yes	SpCas9	Others	High	No
59	3	10.1038/ncomms12617	3	Yes	SpCas9	Others	High	No
59	3	10.1038/ncomms12617	3	Yes	SpCas9	Others	High	No
59	3	10.1038/ncomms12617	≥4	Yes	SpCas9	Others	High	No
59	3	10.1038/ncomms12617	≥4	Yes	SpCas9	Others	High	No
59	3	10.1038/ncomms12617	≥4	Yes	SpCas9	Others	High	No
59	3	10.1038/ncomms12617	≥4	Yes	SpCas9	Others	High	No
59	3	10.1038/ncomms12617	≥4	Yes	SpCas9	Others	High	No
59	3	10.1038/ncomms12617	≥4	Yes	SpCas9	Others	High	No
59	4	10.1038/ncomms12617	3	Yes	SpCas9	DNA-stable	Low	No
59	4	10.1038/ncomms12617	≥4	Yes	SpCas9	DNA-stable	Low	No
59	4	10.1038/ncomms12617	≥4	Yes	SpCas9	DNA-stable	Low	No
59	5	10.1038/ncomms12617	3	Yes	SpCas9	Others	Low	No
59	5	10.1038/ncomms12617	≥4	Yes	SpCas9	Others	Low	No
59	5	10.1038/ncomms12617	≥4	Yes	SpCas9	Others	Low	No
59	7	10.1038/ncomms12617	3	Yes	SpCas9	Others	Low	No
59	7	10.1038/ncomms12617	≥4	Yes	SpCas9	Others	Low	No
59	7	10.1038/ncomms12617	≥4	Yes	SpCas9	Others	Low	No
61	1	10.1038/srep37395	≥4	Yes	SpCas9	DNA-stable	High	No
61	1	10.1038/srep37395	≥4	Yes	SpCas9	DNA-stable	High	No
61	1	10.1038/srep37395	≥4	Yes	SpCas9	DNA-stable	High	No
61	1	10.1038/srep37395	≥4	Yes	SpCas9	DNA-stable	High	No
61	1	10.1038/srep37395	≥4	Yes	SpCas9	DNA-stable	High	No
62		10.1093/nar/gku806	≥4	Yes	SpCas9	DNA-stable	High	No
62		10.1093/nar/gku806	3	Yes	SpCas9	DNA-stable	High	No
64		10.1016/j.jgg.2015.10.006	≥4	Yes	SpCas9	DNA-stable	Low	No
64		10.1016/j.jgg.2015.10.006	≥4	Yes	SpCas9	DNA-stable	Low	No
64		10.1016/j.jgg.2015.10.006	≥4	Yes	SpCas9	DNA-stable	Low	No
64		10.1016/j.jgg.2015.10.006	3	Yes	SpCas9	DNA-stable	Low	No
66		10.1104/pp.17.00426	≥4	Yes	SpCas9	DNA-stable	High	No
67		10.1111/nph.15150	≥4	Yes	SpCas9	DNA-stable	High	No
70	2	10.1111/pbi.12920	3	Yes	SpCas9	DNA-stable	Low	No
70	2	10.1111/pbi.12920	3	Yes	SpCas9	DNA-stable	Low	No
70	2	10.1111/pbi.12920	3	Yes	SpCas9	DNA-stable	Low	No
70	3	10.1111/pbi.12920	3	Yes	SpCas9	DNA-stable	Low	No
74		10.1111/pbi.12771	1	Yes	Others	DNA-stable	Low	No
75		10.3389/fpls.2018.00162	3	Yes	SpCas9	DNA-stable	High	No
75		10.3389/fpls.2018.00162	3	Yes	SpCas9	DNA-stable	High	No
75		10.3389/fpls.2018.00162	3	Yes	SpCas9	DNA-stable	High	No
75		10.3389/fpls.2018.00162	3	Yes	SpCas9	DNA-stable	High	No
75		10.3389/fpls.2018.00162	3	Yes	SpCas9	DNA-stable	High	No
75		10.3389/fpls.2018.00162	2	Yes	SpCas9	DNA-stable	High	No
75		10.3389/fpls.2018.00162	2	Yes	SpCas9	DNA-stable	High	No
76		10.3389/fpls.2018.00162	≥4	Yes	SpCas9	DNA-stable	High	No
76		10.3389/fpls.2018.00162	≥4	Yes	SpCas9	DNA-stable	High	No
78		10.3389/fpls.2018.00162	1	Yes	SpCas9	DNA-stable	High	Yes
79		10.1007/s00299-018-2252-2	1	Yes	SpCas9	DNA-stable	High	No
80	1	10.1111/pbi.12886	3	Yes	SpCas9	DNA-stable	High	No
80	2	10.1111/pbi.12886	≥4	Yes	SpCas9	DNA-stable	High	No
81	2	10.1111/jipb.12650	≥4	Yes	SpCas9	DNA-stable	High	No
81	2	10.1111/jipb.12650	3	Yes	SpCas9	DNA-stable	High	No
82	1	10.1111/tpj.13872	≥4	Yes	SpCas9	DNA-stable	High	No
82	1	10.1111/tpj.13872	≥4	Yes	SpCas9	DNA-stable	High	No
83	1	10.1111/pbi.12781	≥4	Yes	SpCas9	DNA-stable	High	No
83	3	10.1111/pbi.12781	≥4	Yes	SpCas9	DNA-stable	High	No
83	3	10.1111/pbi.12781	≥4	Yes	SpCas9	DNA-stable	High	No
83	6	10.1111/pbi.12781	≥4	Yes	SpCas9	DNA-stable	High	No
83	6	10.1111/pbi.12781	≥4	Yes	SpCas9	DNA-stable	High	No
83	7	10.1111/pbi.12781	≥4	Yes	SpCas9	DNA-stable	High	No
84	1	10.1016/j.molp.2018.03.009	≥4	Yes	Others	DNA-stable	High	No
84	2	10.1016/j.molp.2018.03.009	3	Yes	Others	DNA-stable	High	No
84	4	10.1016/j.molp.2018.03.009	≥4	Yes	Others	DNA-stable	Low	No
84	4	10.1016/j.molp.2018.03.009	2	Yes	Others	DNA-stable	Low	No
85	2	10.3389/fpls.2018.00559	≥4	Yes	SpCas9	DNA-stable	High	No
85	3	10.3389/fpls.2018.00559	≥4	Yes	SpCas9	DNA-stable	High	No
85	3	10.3389/fpls.2018.00559	≥4	Yes	SpCas9	DNA-stable	High	No
85	4	10.3389/fpls.2018.00559	≥4	Yes	SpCas9	DNA-stable	High	No
85	4	10.3389/fpls.2018.00559	≥4	Yes	SpCas9	DNA-stable	High	No
85	5	10.3389/fpls.2018.00559	≥4	Yes	SpCas9	DNA-stable	High	No
85	5	10.3389/fpls.2018.00559	≥4	Yes	SpCas9	DNA-stable	High	No
86		10.1007/s11248-017-0052-z	≥4	Yes	SpCas9	DNA-stable	High	No
87		10.1111/pbi.12927	3	Yes	SpCas9	DNA-stable	Low	No
88	1	10.1007/s11427-017-9247-9	1	Yes	SpCas9	DNA-stable	High	Yes
88	1	10.1007/s11427-017-9247-9	1	Yes	SpCas9	DNA-stable	High	Yes
88	1	10.1007/s11427-017-9247-9	1	Yes	SpCas9	DNA-stable	High	No
88	1	10.1007/s11427-017-9247-9	1	Yes	SpCas9	DNA-stable	High	No
88	1	10.1007/s11427-017-9247-9	1	Yes	SpCas9	DNA-stable	High	No
88	1	10.1007/s11427-017-9247-9	1	Yes	SpCas9	DNA-stable	High	No
88	1	10.1007/s11427-017-9247-9	1	Yes	SpCas9	DNA-stable	High	No
88	1	10.1007/s11427-017-9247-9	1	Yes	SpCas9	DNA-stable	High	Yes
88	1	10.1007/s11427-017-9247-9	2	Yes	SpCas9	DNA-stable	High	No
88	1	10.1007/s11427-017-9247-9	2	Yes	SpCas9	DNA-stable	High	No
88	1	10.1007/s11427-017-9247-9	2	Yes	SpCas9	DNA-stable	High	No
88	1	10.1007/s11427-017-9247-9	2	Yes	SpCas9	DNA-stable	High	Yes
88	1	10.1007/s11427-017-9247-9	2	Yes	SpCas9	DNA-stable	High	No
88	1	10.1007/s11427-017-9247-9	2	Yes	SpCas9	DNA-stable	High	No
88	1	10.1007/s11427-017-9247-9	2	Yes	SpCas9	DNA-stable	High	No
88	1	10.1007/s11427-017-9247-9	2	Yes	SpCas9	DNA-stable	High	No
88	1	10.1007/s11427-017-9247-9	3	Yes	SpCas9	DNA-stable	High	No
88	1	10.1007/s11427-017-9247-9	3	Yes	SpCas9	DNA-stable	High	No
88	1	10.1007/s11427-017-9247-9	3	Yes	SpCas9	DNA-stable	High	No
88	1	10.1007/s11427-017-9247-9	3	Yes	SpCas9	DNA-stable	High	No
88	2	10.1007/s11427-017-9247-9	3	Yes	SpCas9	DNA-stable	Low	No
88	4	10.1007/s11427-017-9247-9	2	Yes	SpCas9	DNA-stable	High	No
90		10.1111/pbi.12733	2	Yes	SpCas9	DNA-stable	Low	No
90		10.1111/pbi.12733	2	Yes	SpCas9	DNA-stable	Low	Yes
90		10.1111/pbi.12733	3	Yes	SpCas9	DNA-stable	Low	Yes
90		10.1111/pbi.12733	3	Yes	SpCas9	DNA-stable	Low	Yes
90		10.1111/pbi.12733	3	Yes	SpCas9	DNA-stable	Low	No
90		10.1111/pbi.12733	3	Yes	SpCas9	DNA-stable	Low	No
92	1	10.1101/277350	≥4	Yes	SpCas9	DNA-stable	Low	No
92	1	10.1101/277350	≥4	Yes	SpCas9	DNA-stable	Low	No
92	1	10.1101/277350	1	Yes	SpCas9	DNA-stable	Low	No
92	2	10.1101/277350	≥4	Yes	SpCas9	DNA-stable	High	No
92	2	10.1101/277350	≥4	Yes	SpCas9	DNA-stable	High	No
93	1	10.1111/pbi.12755	≥4	Yes	SpCas9	DNA-stable	High	No
93	1	10.1111/pbi.12755	≥4	Yes	SpCas9	DNA-stable	High	No
93	1	10.1111/pbi.12755	≥4	Yes	SpCas9	DNA-stable	High	No
93	2	10.1111/pbi.12755	≥4	Yes	SpCas9	DNA-stable	Low	No
93	2	10.1111/pbi.12755	≥4	Yes	SpCas9	DNA-stable	Low	No
93	3	10.1111/pbi.12755	≥4	Yes	SpCas9	DNA-stable	High	No
93	3	10.1111/pbi.12755	≥4	Yes	SpCas9	DNA-stable	High	No
93	3	10.1111/pbi.12755	3	Yes	SpCas9	DNA-stable	High	No
93	3	10.1111/pbi.12755	3	Yes	SpCas9	DNA-stable	High	No
93	4	10.1111/pbi.12755	3	Yes	SpCas9	DNA-stable	Low	No
93	4	10.1111/pbi.12755	3	Yes	SpCas9	DNA-stable	Low	No
93	4	10.1111/pbi.12755	≥4	Yes	SpCas9	DNA-stable	Low	No
93	4	10.1111/pbi.12755	≥4	Yes	SpCas9	DNA-stable	Low	No
94	1	10.1111/pbi.12832	≥4	Yes	SpCas9	DNA-stable	High	No
94	1	10.1111/pbi.12832	≥4	Yes	SpCas9	DNA-stable	High	No
94	2	10.1111/pbi.12832	≥4	Yes	SpCas9	DNA-stable	High	No
94	3	10.1111/pbi.12832	≥4	Yes	SpCas9	DNA-stable	High	No
94	4	10.1111/pbi.12832	≥4	Yes	SpCas9	DNA-stable	High	No
96	1	10.1038/s41598-017-07871-9	3	Yes	SpCas9	DNA-stable	High	No
96	1	10.1038/s41598-017-07871-9	2	Yes	SpCas9	DNA-stable	High	No
96	2	10.1038/s41598-017-07871-9	1	Yes	SpCas9	DNA-stable	High	No
96	3	10.1038/s41598-017-07871-9	1	Yes	SpCas9	DNA-stable	High	No
96	4	10.1038/s41598-017-07871-9	1	Yes	SpCas9	DNA-stable	High	No
96	5	10.1038/s41598-017-07871-9	2	Yes	SpCas9	DNA-stable	High	No
96	5	10.1038/s41598-017-07871-9	2	Yes	SpCas9	DNA-stable	High	No
96	5	10.1038/s41598-017-07871-9	2	Yes	SpCas9	DNA-stable	High	No
96	7	10.1038/s41598-017-07871-9	2	Yes	SpCas9	DNA-stable	High	No
96	7	10.1038/s41598-017-07871-9	2	Yes	SpCas9	DNA-stable	High	No
97	1	10.1007/s00299-017-2172-6	2	Yes	SpCas9	DNA-stable	High	No
97	1	10.1007/s00299-017-2172-6	3	Yes	SpCas9	DNA-stable	High	No
97	2	10.1007/s00299-017-2172-6	1	Yes	SpCas9	DNA-stable	High	No
97	2	10.1007/s00299-017-2172-6	1	Yes	SpCas9	DNA-stable	High	No
97	2	10.1007/s00299-017-2172-6	3	Yes	SpCas9	DNA-stable	High	No
97	3	10.1007/s00299-017-2172-6	≥4	Yes	SpCas9	DNA-stable	High	No
97	3	10.1007/s00299-017-2172-6	≥4	Yes	SpCas9	DNA-stable	High	No
97	4	10.1007/s00299-017-2172-6	2	Yes	SpCas9	DNA-stable	High	No
97	4	10.1007/s00299-017-2172-6	3	Yes	SpCas9	DNA-stable	High	No
97	4	10.1007/s00299-017-2172-6	2	Yes	SpCas9	DNA-stable	High	No
98	1	10.1111/pbi.12872	3	Yes	SpCas9	DNA-stable	Low	No
98	1	10.1111/pbi.12872	3	Yes	SpCas9	DNA-stable	Low	No
98	1	10.1111/pbi.12872	3	Yes	SpCas9	DNA-stable	Low	No
98	1	10.1111/pbi.12872	≥4	Yes	SpCas9	DNA-stable	Low	No
98	1	10.1111/pbi.12872	≥4	Yes	SpCas9	DNA-stable	Low	No
98	1	10.1111/pbi.12872	≥4	Yes	SpCas9	DNA-stable	Low	No
98	1	10.1111/pbi.12872	≥4	Yes	SpCas9	DNA-stable	Low	No
98	1	10.1111/pbi.12872	≥4	Yes	SpCas9	DNA-stable	Low	No
98	1	10.1111/pbi.12872	≥4	Yes	SpCas9	DNA-stable	Low	No
98	1	10.1111/pbi.12872	≥4	Yes	SpCas9	DNA-stable	Low	No
98	1	10.1111/pbi.12872	≥4	Yes	SpCas9	DNA-stable	Low	No
98	2	10.1111/pbi.12872	≥4	Yes	SpCas9	DNA-stable	High	No
98	2	10.1111/pbi.12872	≥4	Yes	SpCas9	DNA-stable	High	No
98	2	10.1111/pbi.12872	≥4	Yes	SpCas9	DNA-stable	High	No
98	2	10.1111/pbi.12872	≥4	Yes	SpCas9	DNA-stable	High	No
98	2	10.1111/pbi.12872	≥4	Yes	SpCas9	DNA-stable	High	No
98	2	10.1111/pbi.12872	≥4	Yes	SpCas9	DNA-stable	High	No
98	2	10.1111/pbi.12872	≥4	Yes	SpCas9	DNA-stable	High	No
98	2	10.1111/pbi.12872	≥4	Yes	SpCas9	DNA-stable	High	No
98	2	10.1111/pbi.12872	≥4	Yes	SpCas9	DNA-stable	High	No
98	2	10.1111/pbi.12872	≥4	Yes	SpCas9	DNA-stable	High	No
98	2	10.1111/pbi.12872	≥4	Yes	SpCas9	DNA-stable	High	No
98	2	10.1111/pbi.12872	≥4	Yes	SpCas9	DNA-stable	High	No
98	2	10.1111/pbi.12872	≥4	Yes	SpCas9	DNA-stable	High	No
98	2	10.1111/pbi.12872	3	Yes	SpCas9	DNA-stable	High	No
98	2	10.1111/pbi.12872	3	Yes	SpCas9	DNA-stable	High	No
98	2	10.1111/pbi.12872	3	Yes	SpCas9	DNA-stable	High	No
98	3	10.1111/pbi.12872	≥4	Yes	SpCas9	DNA-stable	High	No
98	3	10.1111/pbi.12872	≥4	Yes	SpCas9	DNA-stable	High	No
98	3	10.1111/pbi.12872	≥4	Yes	SpCas9	DNA-stable	High	No
98	3	10.1111/pbi.12872	≥4	Yes	SpCas9	DNA-stable	High	No
98	3	10.1111/pbi.12872	≥4	Yes	SpCas9	DNA-stable	High	No
98	3	10.1111/pbi.12872	≥4	Yes	SpCas9	DNA-stable	High	No
98	3	10.1111/pbi.12872	≥4	Yes	SpCas9	DNA-stable	High	No
98	3	10.1111/pbi.12872	3	Yes	SpCas9	DNA-stable	High	No
98	3	10.1111/pbi.12872	3	Yes	SpCas9	DNA-stable	High	No
98	3	10.1111/pbi.12872	3	Yes	SpCas9	DNA-stable	High	No
98	3	10.1111/pbi.12872	3	Yes	SpCas9	DNA-stable	High	No
98	4	10.1111/pbi.12872	≥4	Yes	SpCas9	DNA-stable	High	No
98	4	10.1111/pbi.12872	≥4	Yes	SpCas9	DNA-stable	High	No
98	4	10.1111/pbi.12872	≥4	Yes	SpCas9	DNA-stable	High	No
98	4	10.1111/pbi.12872	≥4	Yes	SpCas9	DNA-stable	High	No
98	5	10.1111/pbi.12872	3	Yes	SpCas9	DNA-stable	Low	No
98	5	10.1111/pbi.12872	3	Yes	SpCas9	DNA-stable	Low	No
98	5	10.1111/pbi.12872	≥4	Yes	SpCas9	DNA-stable	Low	No
98	5	10.1111/pbi.12872	≥4	Yes	SpCas9	DNA-stable	Low	No
98	5	10.1111/pbi.12872	≥4	Yes	SpCas9	DNA-stable	Low	No
98	5	10.1111/pbi.12872	≥4	Yes	SpCas9	DNA-stable	Low	No
98	5	10.1111/pbi.12872	≥4	Yes	SpCas9	DNA-stable	Low	No
99		10.1007/s00299-017-2118-z	≥4	Yes	SpCas9	DNA-stable	High	No
99		10.1007/s00299-017-2118-z	3	Yes	SpCas9	DNA-stable	High	No
99		10.1007/s00299-017-2118-z	3	Yes	SpCas9	DNA-stable	High	No
99		10.1007/s00299-017-2118-z	3	Yes	SpCas9	DNA-stable	High	No
99		10.1007/s00299-017-2118-z	3	Yes	SpCas9	DNA-stable	High	No
99		10.1007/s00299-017-2118-z	3	Yes	SpCas9	DNA-stable	High	No
99		10.1007/s00299-017-2118-z	3	Yes	SpCas9	DNA-stable	High	No
99		10.1007/s00299-017-2118-z	2	Yes	SpCas9	DNA-stable	High	No
101	2	10.1186/s13059-017-1325-9	3	Yes	Others	DNA-stable	High	No
101	3	10.1186/s13059-017-1325-9	2	Yes	Others	DNA-stable	High	No
101	3	10.1186/s13059-017-1325-9	2	Yes	Others	DNA-stable	High	No
101	3	10.1186/s13059-017-1325-9	2	Yes	Others	DNA-stable	High	No
101	3	10.1186/s13059-017-1325-9	2	Yes	Others	DNA-stable	High	No
101	3	10.1186/s13059-017-1325-9	2	Yes	Others	DNA-stable	High	No
101	3	10.1186/s13059-017-1325-9	2	Yes	Others	DNA-stable	High	Yes
101	3	10.1186/s13059-017-1325-9	2	Yes	Others	DNA-stable	High	No
101	3	10.1186/s13059-017-1325-9	2	Yes	Others	DNA-stable	High	No
101	5	10.1186/s13059-017-1325-9	3	Yes	Others	DNA-stable	High	Yes
101	6	10.1186/s13059-017-1325-9	2	Yes	Others	DNA-stable	High	No
101	6	10.1186/s13059-017-1325-9	2	Yes	Others	DNA-stable	High	Yes
101	6	10.1186/s13059-017-1325-9	2	Yes	Others	DNA-stable	High	No
101	6	10.1186/s13059-017-1325-9	2	Yes	Others	DNA-stable	High	No
101	6	10.1186/s13059-017-1325-9	2	Yes	Others	DNA-stable	High	No
101	6	10.1186/s13059-017-1325-9	2	Yes	Others	DNA-stable	High	Yes
101	6	10.1186/s13059-017-1325-9	2	Yes	Others	DNA-stable	High	Yes
101	6	10.1186/s13059-017-1325-9	2	Yes	Others	DNA-stable	High	No
101	8	10.1186/s13059-017-1325-9	3	Yes	SpCas9	DNA-stable	High	Yes
101	9	10.1186/s13059-017-1325-9	2	Yes	SpCas9	DNA-stable	High	No
101	9	10.1186/s13059-017-1325-9	2	Yes	SpCas9	DNA-stable	High	No
101	9	10.1186/s13059-017-1325-9	2	Yes	SpCas9	DNA-stable	High	No
101	9	10.1186/s13059-017-1325-9	2	Yes	SpCas9	DNA-stable	High	Yes
101	9	10.1186/s13059-017-1325-9	2	Yes	SpCas9	DNA-stable	High	No
101	9	10.1186/s13059-017-1325-9	2	Yes	SpCas9	DNA-stable	High	Yes
101	9	10.1186/s13059-017-1325-9	2	Yes	SpCas9	DNA-stable	High	Yes
101	9	10.1186/s13059-017-1325-9	2	Yes	SpCas9	DNA-stable	High	No
101	11	10.1186/s13059-017-1325-9	3	Yes	Others	DNA-stable	High	No
101	12	10.1186/s13059-017-1325-9	2	Yes	Others	DNA-stable	High	No
101	12	10.1186/s13059-017-1325-9	2	Yes	Others	DNA-stable	High	No
101	12	10.1186/s13059-017-1325-9	2	Yes	Others	DNA-stable	High	No
101	12	10.1186/s13059-017-1325-9	2	Yes	Others	DNA-stable	High	No
101	12	10.1186/s13059-017-1325-9	2	Yes	Others	DNA-stable	High	No
101	12	10.1186/s13059-017-1325-9	2	Yes	Others	DNA-stable	High	No
101	12	10.1186/s13059-017-1325-9	2	Yes	Others	DNA-stable	High	Yes
101	12	10.1186/s13059-017-1325-9	2	Yes	Others	DNA-stable	High	No
102	1	10.1007/s00299-017-2202-4	2	Yes	SpCas9	DNA-stable	Low	No
103		10.1111/jipb.12620	≥4	Yes	SpCas9	DNA-stable	Low	No
104		10.1007/s11103-018-0709-x	3	Yes	Others	DNA-stable	Low	No
104		10.1007/s11103-018-0709-x	3	Yes	Others	DNA-stable	Low	No
106		10.1111/tpj.13599	≥4	Yes	SpCas9	DNA-stable	Low	No
107	3	10.3389/fpls.2017.01598	3	Yes	SpCas9	DNA-stable	High	No
107	4	10.3389/fpls.2017.01598	2	Yes	SpCas9	DNA-stable	High	No
107	4	10.3389/fpls.2017.01598	≥4	Yes	SpCas9	DNA-stable	High	No
107	6	10.3389/fpls.2017.01598	1	Yes	SpCas9	DNA-stable	High	No
107	6	10.3389/fpls.2017.01598	3	Yes	SpCas9	DNA-stable	High	No
112	1	10.1111/pbi.12857	3	Yes	SpCas9	DNA-stable	Low	No
112	1	10.1111/pbi.12857	3	Yes	SpCas9	DNA-stable	Low	No
112	1	10.1111/pbi.12857	3	Yes	SpCas9	DNA-stable	Low	No
112	1	10.1111/pbi.12857	3	Yes	SpCas9	DNA-stable	Low	No
112	1	10.1111/pbi.12857	≥4	Yes	SpCas9	DNA-stable	Low	No
112	1	10.1111/pbi.12857	≥4	Yes	SpCas9	DNA-stable	Low	No
112	1	10.1111/pbi.12857	≥4	Yes	SpCas9	DNA-stable	Low	No
112	1	10.1111/pbi.12857	≥4	Yes	SpCas9	DNA-stable	Low	No
112	1	10.1111/pbi.12857	≥4	Yes	SpCas9	DNA-stable	Low	No
112	1	10.1111/pbi.12857	≥4	Yes	SpCas9	DNA-stable	Low	No
112	1	10.1111/pbi.12857	≥4	Yes	SpCas9	DNA-stable	Low	No
112	1	10.1111/pbi.12857	≥4	Yes	SpCas9	DNA-stable	Low	No
112	1	10.1111/pbi.12857	≥4	Yes	SpCas9	DNA-stable	Low	No
112	1	10.1111/pbi.12857	≥4	Yes	SpCas9	DNA-stable	Low	No
112	1	10.1111/pbi.12857	≥4	Yes	SpCas9	DNA-stable	Low	No
112	1	10.1111/pbi.12857	≥4	Yes	SpCas9	DNA-stable	Low	No
112	2	10.1111/pbi.12857	3	Yes	SpCas9	DNA-stable	Low	No
112	2	10.1111/pbi.12857	3	Yes	SpCas9	DNA-stable	Low	No
112	2	10.1111/pbi.12857	3	Yes	SpCas9	DNA-stable	Low	No
112	2	10.1111/pbi.12857	3	Yes	SpCas9	DNA-stable	Low	No
112	2	10.1111/pbi.12857	3	Yes	SpCas9	DNA-stable	Low	No
112	2	10.1111/pbi.12857	≥4	Yes	SpCas9	DNA-stable	Low	No
112	2	10.1111/pbi.12857	≥4	Yes	SpCas9	DNA-stable	Low	No
112	2	10.1111/pbi.12857	≥4	Yes	SpCas9	DNA-stable	Low	No
112	2	10.1111/pbi.12857	≥4	Yes	SpCas9	DNA-stable	Low	No
112	2	10.1111/pbi.12857	≥4	Yes	SpCas9	DNA-stable	Low	No
112	2	10.1111/pbi.12857	≥4	Yes	SpCas9	DNA-stable	Low	No
112	2	10.1111/pbi.12857	≥4	Yes	SpCas9	DNA-stable	Low	No
112	2	10.1111/pbi.12857	≥4	Yes	SpCas9	DNA-stable	Low	No
112	2	10.1111/pbi.12857	≥4	Yes	SpCas9	DNA-stable	Low	No
112	2	10.1111/pbi.12857	≥4	Yes	SpCas9	DNA-stable	Low	No
112	3	10.1111/pbi.12857	3	Yes	SpCas9	DNA-stable	Low	No
112	3	10.1111/pbi.12857	3	Yes	SpCas9	DNA-stable	Low	No
112	3	10.1111/pbi.12857	3	Yes	SpCas9	DNA-stable	Low	No
112	3	10.1111/pbi.12857	3	Yes	SpCas9	DNA-stable	Low	No
112	3	10.1111/pbi.12857	3	Yes	SpCas9	DNA-stable	Low	No
112	3	10.1111/pbi.12857	3	Yes	SpCas9	DNA-stable	Low	No
112	3	10.1111/pbi.12857	3	Yes	SpCas9	DNA-stable	Low	No
112	3	10.1111/pbi.12857	3	Yes	SpCas9	DNA-stable	Low	No
112	3	10.1111/pbi.12857	3	Yes	SpCas9	DNA-stable	Low	No
113	2	10.3389/fpls.2017.01730	≥4	Yes	SpCas9	DNA-stable	High	No
115		10.1093/jxb/erx457	≥4	Yes	SpCas9	Others	High	No
115		10.1093/jxb/erx457	≥4	Yes	SpCas9	Others	High	No
115		10.1093/jxb/erx457	≥4	Yes	SpCas9	Others	High	No
115		10.1093/jxb/erx457	≥4	Yes	SpCas9	Others	High	No
115		10.1093/jxb/erx457	≥4	Yes	SpCas9	Others	High	No
115		10.1093/jxb/erx457	≥4	Yes	SpCas9	Others	High	No
116		10.3389/fpls.2017.02135	≥4	Yes	Others	DNA-stable	Low	No
116		10.3389/fpls.2017.02135	≥4	Yes	Others	DNA-stable	Low	No
116		10.3389/fpls.2017.02135	≥4	Yes	Others	DNA-stable	Low	No
118	3	10.1016/j.jgg.2017.02.002	1	Yes	SpCas9	DNA-stable	High	No
118	3	10.1016/j.jgg.2017.02.002	2	Yes	SpCas9	DNA-stable	High	No
118	3	10.1016/j.jgg.2017.02.002	2	Yes	SpCas9	DNA-stable	High	No
118	3	10.1016/j.jgg.2017.02.002	2	Yes	SpCas9	DNA-stable	High	No
119		10.1093/pcp/pcx040	≥4	Yes	SpCas9	DNA-stable	High	No
120	1	10.1016/j.molp.2017.06.006	≥4	Yes	SpCas9	DNA-stable	High	No
120	1	10.1016/j.molp.2017.06.006	≥4	Yes	SpCas9	DNA-stable	High	No
120	1	10.1016/j.molp.2017.06.006	≥4	Yes	SpCas9	DNA-stable	High	No
120	1	10.1016/j.molp.2017.06.006	≥4	Yes	SpCas9	DNA-stable	High	No
120	1	10.1016/j.molp.2017.06.006	≥4	Yes	SpCas9	DNA-stable	High	No
120	1	10.1016/j.molp.2017.06.006	≥4	Yes	SpCas9	DNA-stable	High	No
120	1	10.1016/j.molp.2017.06.006	≥4	Yes	SpCas9	DNA-stable	High	No
120	1	10.1016/j.molp.2017.06.006	≥4	Yes	SpCas9	DNA-stable	High	No
120	1	10.1016/j.molp.2017.06.006	≥4	Yes	SpCas9	DNA-stable	High	No
120	2	10.1016/j.molp.2017.06.006	3	Yes	SpCas9	DNA-stable	High	No
120	2	10.1016/j.molp.2017.06.006	3	Yes	SpCas9	DNA-stable	High	No
120	2	10.1016/j.molp.2017.06.006	3	Yes	SpCas9	DNA-stable	High	No
120	3	10.1016/j.molp.2017.06.006	3	Yes	SpCas9	DNA-stable	High	No
120	3	10.1016/j.molp.2017.06.006	3	Yes	SpCas9	DNA-stable	High	No
120	3	10.1016/j.molp.2017.06.006	3	Yes	SpCas9	DNA-stable	High	No
120	3	10.1016/j.molp.2017.06.006	3	Yes	SpCas9	DNA-stable	High	No
120	3	10.1016/j.molp.2017.06.006	3	Yes	SpCas9	DNA-stable	High	No
120	3	10.1016/j.molp.2017.06.006	3	Yes	SpCas9	DNA-stable	High	No
120	3	10.1016/j.molp.2017.06.006	3	Yes	SpCas9	DNA-stable	High	No
120	3	10.1016/j.molp.2017.06.006	3	Yes	SpCas9	DNA-stable	High	No
121		10.1371/journal.pone.0177966	1	Yes	SpCas9	DNA-stable	High	No
122	1	10.1111/tpj.13632	≥4	Yes	SpCas9	DNA-stable	High	No
122	1	10.1111/tpj.13632	3	Yes	SpCas9	DNA-stable	High	No
122	2	10.1111/tpj.13632	≥4	Yes	SpCas9	DNA-stable	High	No
122	2	10.1111/tpj.13632	≥4	Yes	SpCas9	DNA-stable	High	No
122	2	10.1111/tpj.13632	≥4	Yes	SpCas9	DNA-stable	High	No
126	1	10.1038/s41598-017-14832-9	≥4	Yes	SpCas9	DNA-stable	High	No
126	2	10.1038/s41598-017-14832-9	≥4	Yes	SpCas9	DNA-stable	High	No
127		10.1038/s41598-017-00501-4	≥4	Yes	SpCas9	DNA-stable	High	No
127		10.1038/s41598-017-00501-4	≥4	Yes	SpCas9	DNA-stable	High	No
129		10.3864/j.issn.0578-1752.2017.15.002	2	Yes	SpCas9	DNA-stable	High	No
130	1	10.1021/acs.jafc.7b02745	≥4	Yes	SpCas9	DNA-stable	High	No
130	1	10.1021/acs.jafc.7b02745	3	Yes	SpCas9	DNA-stable	High	No
130	2	10.1021/acs.jafc.7b02745	≥4	Yes	SpCas9	DNA-stable	High	No
130	2	10.1021/acs.jafc.7b02745	≥4	Yes	SpCas9	DNA-stable	High	No
130	2	10.1021/acs.jafc.7b02745	≥4	Yes	SpCas9	DNA-stable	High	No
131	2	10.1104/pp.17.01265	≥4	Yes	SpCas9	DNA-stable	High	No
133		10.1186/s12896-019-0501-2	1	Yes	SpCas9	DNA-stable	High	No
133		10.1186/s12896-019-0501-2	1	Yes	SpCas9	DNA-stable	High	No
133		10.1186/s12896-019-0501-2	1	Yes	SpCas9	DNA-stable	High	No
133		10.1186/s12896-019-0501-2	3	Yes	SpCas9	DNA-stable	High	No
133		10.1186/s12896-019-0501-2	3	Yes	SpCas9	DNA-stable	High	No
133		10.1186/s12896-019-0501-2	≥4	Yes	SpCas9	DNA-stable	High	No
133		10.1186/s12896-019-0501-2	≥4	Yes	SpCas9	DNA-stable	High	No
133		10.1186/s12896-019-0501-2	≥4	Yes	SpCas9	DNA-stable	High	No
133		10.1186/s12896-019-0501-2	≥4	Yes	SpCas9	DNA-stable	High	No
133		10.1186/s12896-019-0501-2	3	Yes	SpCas9	DNA-stable	High	No
134	1	10.1126/sciadv.aat6086	3	Yes	SpCas9	DNA-stable	High	No
134	1	10.1126/sciadv.aat6086	≥4	Yes	SpCas9	DNA-stable	High	No
134	1	10.1126/sciadv.aat6086	≥4	Yes	SpCas9	DNA-stable	High	No
134	1	10.1126/sciadv.aat6086	≥4	Yes	SpCas9	DNA-stable	High	No
134	1	10.1126/sciadv.aat6086	≥4	Yes	SpCas9	DNA-stable	High	No
134	1	10.1126/sciadv.aat6086	≥4	Yes	SpCas9	DNA-stable	High	No
134	1	10.1126/sciadv.aat6086	≥4	Yes	SpCas9	DNA-stable	High	No
134	2	10.1126/sciadv.aat6086	≥4	Yes	SpCas9	DNA-stable	Low	No
134	2	10.1126/sciadv.aat6086	≥4	Yes	SpCas9	DNA-stable	Low	No
134	2	10.1126/sciadv.aat6086	≥4	Yes	SpCas9	DNA-stable	Low	No
134	2	10.1126/sciadv.aat6086	≥4	Yes	SpCas9	DNA-stable	Low	No
134	2	10.1126/sciadv.aat6086	≥4	Yes	SpCas9	DNA-stable	Low	No
134	2	10.1126/sciadv.aat6086	≥4	Yes	SpCas9	DNA-stable	Low	No
135	1	10.3389/fpls.2019.00040	3	Yes	SpCas9	DNA-stable	High	No
135	3	10.3389/fpls.2019.00040	3	Yes	SpCas9	DNA-stable	High	No
136		10.3389/fpls.2018.01180	3	Yes	SpCas9	DNA-stable	High	No
136		10.3389/fpls.2018.01180	≥4	Yes	SpCas9	DNA-stable	High	No
137		10.1007/s00299-019-02373-6	3	Yes	SpCas9	DNA-stable	Low	No
138		10.3390/ijms19124046	≥4	Yes	SpCas9	DNA-stable	High	No
138		10.3390/ijms19124046	≥4	Yes	SpCas9	DNA-stable	High	No
138		10.3390/ijms19124046	3	Yes	SpCas9	DNA-stable	High	No
139	2	10.1007/s00299-019-02378-1	3	Yes	SpCas9	DNA-stable	Low	No
141	2	10.1038/s41438-018-0111-5	≥4	Yes	SpCas9	DNA-stable	High	No
141	3	10.1038/s41438-018-0111-5	3	Yes	SpCas9	DNA-stable	High	No
141	3	10.1038/s41438-018-0111-5	≥4	Yes	SpCas9	DNA-stable	High	No
142	1	10.1111/pbi.12987	≥4	Yes	SpCas9	DNA-stable	High	No
142	1	10.1111/pbi.12987	≥4	Yes	SpCas9	DNA-stable	High	No
142	2	10.1111/pbi.12987	3	Yes	SpCas9	DNA-stable	High	No
142	2	10.1111/pbi.12987	≥4	Yes	SpCas9	DNA-stable	High	No
143	2	10.3390/agronomy8120290	3	Yes	SpCas9	DNA-stable	High	No
143	3	10.3390/agronomy8120290	≥4	Yes	SpCas9	DNA-stable	High	No
143	3	10.3390/agronomy8120290	≥4	Yes	SpCas9	DNA-stable	High	No
143	3	10.3390/agronomy8120290	3	Yes	SpCas9	DNA-stable	High	No
143	4	10.3390/agronomy8120290	≥4	Yes	SpCas9	DNA-stable	High	No
145		10.1038/s41438-018-0082-6	≥4	Yes	SpCas9	DNA-stable	Low	No
147	2	10.1186/s13059-018-1580-4	3	Yes	SpCas9	DNA-stable	Low	No
147	2	10.1186/s13059-018-1580-4	3	Yes	SpCas9	DNA-stable	Low	No
147	2	10.1186/s13059-018-1580-4	3	Yes	SpCas9	DNA-stable	Low	No
147	2	10.1186/s13059-018-1580-4	≥4	Yes	SpCas9	DNA-stable	Low	No
147	2	10.1186/s13059-018-1580-4	≥4	Yes	SpCas9	DNA-stable	Low	No
147	2	10.1186/s13059-018-1580-4	≥4	Yes	SpCas9	DNA-stable	Low	No
147	2	10.1186/s13059-018-1580-4	≥4	Yes	SpCas9	DNA-stable	Low	No
148	1	10.1093/jxb/erz074	≥4	Yes	SpCas9	DNA-stable	High	No
148	1	10.1093/jxb/erz074	≥4	Yes	SpCas9	DNA-stable	High	No
148	2	10.1093/jxb/erz074	≥4	Yes	SpCas9	DNA-stable	High	No
148	2	10.1093/jxb/erz074	≥4	Yes	SpCas9	DNA-stable	High	No
148	2	10.1093/jxb/erz074	≥4	Yes	SpCas9	DNA-stable	High	No
149	1	10.1111/pbi.12982	3	Yes	SpCas9	DNA-stable	Low	No
149	1	10.1111/pbi.12982	3	Yes	SpCas9	DNA-stable	Low	No
149	1	10.1111/pbi.12982	3	Yes	SpCas9	DNA-stable	Low	No
149	1	10.1111/pbi.12982	≥4	Yes	SpCas9	DNA-stable	Low	No
149	1	10.1111/pbi.12982	≥4	Yes	SpCas9	DNA-stable	Low	No
149	1	10.1111/pbi.12982	≥4	Yes	SpCas9	DNA-stable	Low	No
149	1	10.1111/pbi.12982	≥4	Yes	SpCas9	DNA-stable	Low	No
149	1	10.1111/pbi.12982	≥4	Yes	SpCas9	DNA-stable	Low	No
149	1	10.1111/pbi.12982	≥4	Yes	SpCas9	DNA-stable	Low	No
149	1	10.1111/pbi.12982	≥4	Yes	SpCas9	DNA-stable	Low	No
149	1	10.1111/pbi.12982	≥4	Yes	SpCas9	DNA-stable	Low	No
149	1	10.1111/pbi.12982	≥4	Yes	SpCas9	DNA-stable	Low	No
149	1	10.1111/pbi.12982	≥4	Yes	SpCas9	DNA-stable	Low	No
149	1	10.1111/pbi.12982	2	Yes	SpCas9	DNA-stable	Low	No
149	2	10.1111/pbi.12982	≥4	Yes	SpCas9	DNA-stable	High	No
149	2	10.1111/pbi.12982	≥4	Yes	SpCas9	DNA-stable	High	No
149	2	10.1111/pbi.12982	≥4	Yes	SpCas9	DNA-stable	High	No
149	2	10.1111/pbi.12982	≥4	Yes	SpCas9	DNA-stable	High	No
149	2	10.1111/pbi.12982	≥4	Yes	SpCas9	DNA-stable	High	No
149	2	10.1111/pbi.12982	≥4	Yes	SpCas9	DNA-stable	High	No
149	2	10.1111/pbi.12982	≥4	Yes	SpCas9	DNA-stable	High	No
149	2	10.1111/pbi.12982	≥4	Yes	SpCas9	DNA-stable	High	No
149	2	10.1111/pbi.12982	≥4	Yes	SpCas9	DNA-stable	High	No
149	2	10.1111/pbi.12982	≥4	Yes	SpCas9	DNA-stable	High	No
149	2	10.1111/pbi.12982	≥4	Yes	SpCas9	DNA-stable	High	No
149	2	10.1111/pbi.12982	≥4	Yes	SpCas9	DNA-stable	High	No
149	2	10.1111/pbi.12982	≥4	Yes	SpCas9	DNA-stable	High	No
149	2	10.1111/pbi.12982	3	Yes	SpCas9	DNA-stable	High	No
149	2	10.1111/pbi.12982	3	Yes	SpCas9	DNA-stable	High	No
150	1	10.1111/pbi.13020	3	Yes	SpCas9	DNA-stable	Low	No
150	1	10.1111/pbi.13020	3	Yes	SpCas9	DNA-stable	Low	No
150	1	10.1111/pbi.13020	2	Yes	SpCas9	DNA-stable	Low	No
150	1	10.1111/pbi.13020	2	Yes	SpCas9	DNA-stable	Low	No
150	2	10.1111/pbi.13020	3	Yes	SpCas9	DNA-stable	Low	No
150	2	10.1111/pbi.13020	3	Yes	SpCas9	DNA-stable	Low	No
150	2	10.1111/pbi.13020	3	Yes	SpCas9	DNA-stable	Low	No
150	2	10.1111/pbi.13020	3	Yes	SpCas9	DNA-stable	Low	No
150	2	10.1111/pbi.13020	3	Yes	SpCas9	DNA-stable	Low	No
150	2	10.1111/pbi.13020	3	Yes	SpCas9	DNA-stable	Low	No
150	2	10.1111/pbi.13020	3	Yes	SpCas9	DNA-stable	Low	No
150	3	10.1111/pbi.13020	1	Yes	SpCas9	DNA-stable	High	No
150	4	10.1111/pbi.13020	3	Yes	SpCas9	DNA-stable	High	No
150	4	10.1111/pbi.13020	3	Yes	SpCas9	DNA-stable	High	No
150	4	10.1111/pbi.13020	3	Yes	SpCas9	DNA-stable	High	No
150	4	10.1111/pbi.13020	3	Yes	SpCas9	DNA-stable	High	No
150	4	10.1111/pbi.13020	3	Yes	SpCas9	DNA-stable	High	Yes
150	5	10.1111/pbi.13020	2	Yes	SpCas9	DNA-stable	High	No
150	5	10.1111/pbi.13020	2	Yes	SpCas9	DNA-stable	High	No
150	5	10.1111/pbi.13020	2	Yes	SpCas9	DNA-stable	High	No
150	5	10.1111/pbi.13020	2	Yes	SpCas9	DNA-stable	High	Yes
150	5	10.1111/pbi.13020	3	Yes	SpCas9	DNA-stable	High	No
150	5	10.1111/pbi.13020	3	Yes	SpCas9	DNA-stable	High	No
150	6	10.1111/pbi.13020	2	Yes	SpCas9	DNA-stable	Low	No
150	6	10.1111/pbi.13020	2	Yes	SpCas9	DNA-stable	Low	No
150	6	10.1111/pbi.13020	2	Yes	SpCas9	DNA-stable	Low	No
150	6	10.1111/pbi.13020	2	Yes	SpCas9	DNA-stable	Low	No
150	6	10.1111/pbi.13020	2	Yes	SpCas9	DNA-stable	Low	No
150	6	10.1111/pbi.13020	2	Yes	SpCas9	DNA-stable	Low	No
150	6	10.1111/pbi.13020	2	Yes	SpCas9	DNA-stable	Low	No
150	6	10.1111/pbi.13020	3	Yes	SpCas9	DNA-stable	Low	No
150	6	10.1111/pbi.13020	3	Yes	SpCas9	DNA-stable	Low	No
150	6	10.1111/pbi.13020	3	Yes	SpCas9	DNA-stable	Low	No
150	6	10.1111/pbi.13020	3	Yes	SpCas9	DNA-stable	Low	No
150	6	10.1111/pbi.13020	3	Yes	SpCas9	DNA-stable	Low	No
150	6	10.1111/pbi.13020	3	Yes	SpCas9	DNA-stable	Low	No
150	6	10.1111/pbi.13020	3	Yes	SpCas9	DNA-stable	Low	No
150	6	10.1111/pbi.13020	3	Yes	SpCas9	DNA-stable	Low	No
150	6	10.1111/pbi.13020	3	Yes	SpCas9	DNA-stable	Low	No
150	6	10.1111/pbi.13020	3	Yes	SpCas9	DNA-stable	Low	No
150	6	10.1111/pbi.13020	3	Yes	SpCas9	DNA-stable	Low	No
150	6	10.1111/pbi.13020	3	Yes	SpCas9	DNA-stable	Low	No
151	1	10.1186/s12870-018-1627-4	≥4	Yes	SpCas9	DNA-stable	High	No
151	1	10.1186/s12870-018-1627-4	≥4	Yes	SpCas9	DNA-stable	High	No
151	1	10.1186/s12870-018-1627-4	≥4	Yes	SpCas9	DNA-stable	High	No
151	2	10.1186/s12870-018-1627-4	≥4	Yes	SpCas9	DNA-stable	Low	No
151	2	10.1186/s12870-018-1627-4	≥4	Yes	SpCas9	DNA-stable	Low	No
152	2	10.1021/acs.jafc.8b02177	2	Yes	SpCas9	DNA-stable	Low	No
152	2	10.1021/acs.jafc.8b02177	≥4	Yes	SpCas9	DNA-stable	Low	No
152	2	10.1021/acs.jafc.8b02177	≥4	Yes	SpCas9	DNA-stable	Low	No
153	1	10.1093/jxb/ery245	≥4	Yes	Others	DNA-stable	High	No
153	1	10.1093/jxb/ery245	≥4	Yes	Others	DNA-stable	High	No
153	1	10.1093/jxb/ery245	≥4	Yes	Others	DNA-stable	High	No
153	2	10.1093/jxb/ery245	≥4	Yes	Others	DNA-stable	Low	No
153	2	10.1093/jxb/ery245	≥4	Yes	Others	DNA-stable	Low	No
154	1	10.1038/nbt.4273	≥4	Yes	SpCas9	DNA-stable	Low	No
154	1	10.1038/nbt.4273	≥4	Yes	SpCas9	DNA-stable	Low	No
154	1	10.1038/nbt.4273	≥4	Yes	SpCas9	DNA-stable	Low	No
154	1	10.1038/nbt.4273	≥4	Yes	SpCas9	DNA-stable	Low	No
154	1	10.1038/nbt.4273	≥4	Yes	SpCas9	DNA-stable	Low	No
154	2	10.1038/nbt.4273	≥4	Yes	SpCas9	DNA-stable	High	No
154	2	10.1038/nbt.4273	≥4	Yes	SpCas9	DNA-stable	High	No
154	2	10.1038/nbt.4273	≥4	Yes	SpCas9	DNA-stable	High	No
154	2	10.1038/nbt.4273	≥4	Yes	SpCas9	DNA-stable	High	No
154	2	10.1038/nbt.4273	≥4	Yes	SpCas9	DNA-stable	High	No
154	2	10.1038/nbt.4273	≥4	Yes	SpCas9	DNA-stable	High	No
154	3	10.1038/nbt.4273	3	Yes	SpCas9	DNA-stable	Low	No
154	3	10.1038/nbt.4273	≥4	Yes	SpCas9	DNA-stable	Low	No
154	3	10.1038/nbt.4273	≥4	Yes	SpCas9	DNA-stable	Low	No
154	4	10.1038/nbt.4273	≥4	Yes	SpCas9	DNA-stable	Low	No
154	4	10.1038/nbt.4273	≥4	Yes	SpCas9	DNA-stable	Low	No
154	4	10.1038/nbt.4273	≥4	Yes	SpCas9	DNA-stable	Low	No
154	4	10.1038/nbt.4273	≥4	Yes	SpCas9	DNA-stable	Low	No
154	4	10.1038/nbt.4273	≥4	Yes	SpCas9	DNA-stable	Low	No
154	4	10.1038/nbt.4273	≥4	Yes	SpCas9	DNA-stable	Low	No
154	5	10.1038/nbt.4273	2	Yes	SpCas9	DNA-stable	Low	No
154	5	10.1038/nbt.4273	3	Yes	SpCas9	DNA-stable	Low	No
154	5	10.1038/nbt.4273	≥4	Yes	SpCas9	DNA-stable	Low	No
154	5	10.1038/nbt.4273	≥4	Yes	SpCas9	DNA-stable	Low	No
154	6	10.1038/nbt.4273	3	Yes	SpCas9	DNA-stable	Low	No
154	6	10.1038/nbt.4273	3	Yes	SpCas9	DNA-stable	Low	No
154	6	10.1038/nbt.4273	≥4	Yes	SpCas9	DNA-stable	Low	No
154	6	10.1038/nbt.4273	≥4	Yes	SpCas9	DNA-stable	Low	No
155	3	10.1038/s41438-018-0107-1	2	Yes	SpCas9	DNA-stable	High	No
155	5	10.1038/s41438-018-0107-1	≥4	Yes	SpCas9	DNA-stable	Low	No
156		10.1093/jxb/ery400	≥4	Yes	SpCas9	DNA-stable	Low	No
156		10.1093/jxb/ery400	≥4	Yes	SpCas9	DNA-stable	Low	No
157	1	10.1093/treephys/tpy088	3	Yes	SpCas9	DNA-stable	Low	No
157	2	10.1093/treephys/tpy088	≥4	Yes	SpCas9	DNA-stable	Low	No
157	2	10.1093/treephys/tpy088	≥4	Yes	SpCas9	DNA-stable	Low	No
157	2	10.1093/treephys/tpy088	≥4	Yes	SpCas9	DNA-stable	Low	No
157	3	10.1093/treephys/tpy088	≥4	Yes	SpCas9	DNA-stable	Low	No
157	3	10.1093/treephys/tpy088	≥4	Yes	SpCas9	DNA-stable	Low	No
158	3	10.1111/pbi.13106	2	Yes	SpCas9	DNA-stable	Low	No
158	3	10.1111/pbi.13106	2	Yes	SpCas9	DNA-stable	Low	No
161	41	10.1371/journal.pone.0211598	1	Yes	SpCas9	Others	Low	Yes
161	41	10.1371/journal.pone.0211598	1	Yes	SpCas9	Others	Low	No
161	42	10.1371/journal.pone.0211598	1	Yes	Others	Others	Low	Yes
161	42	10.1371/journal.pone.0211598	1	Yes	Others	Others	Low	Yes
161	43	10.1371/journal.pone.0211598	1	Yes	Others	Others	Low	Yes
161	43	10.1371/journal.pone.0211598	1	Yes	Others	Others	Low	Yes
161	44	10.1371/journal.pone.0211598	1	Yes	Others	Others	Low	No
161	44	10.1371/journal.pone.0211598	1	Yes	Others	Others	Low	Yes
161	45	10.1371/journal.pone.0211598	1	Yes	Others	Others	Low	Yes
161	45	10.1371/journal.pone.0211598	1	Yes	Others	Others	Low	No
163		10.3389/fpls.2018.00740	3	Yes	SpCas9	DNA-stable	High	No
163		10.3389/fpls.2018.00740	3	Yes	SpCas9	DNA-stable	High	No
164		10.1038/s41598-018-34884-9	≥4	Yes	SpCas9	DNA-stable	Low	No
165	1	10.1111/tpj.14141	≥4	Yes	SpCas9	DNA-stable	High	No
165	1	10.1111/tpj.14141	≥4	Yes	SpCas9	DNA-stable	High	No
165	1	10.1111/tpj.14141	≥4	Yes	SpCas9	DNA-stable	High	No
165	1	10.1111/tpj.14141	≥4	Yes	SpCas9	DNA-stable	High	No
166	1	10.1111/tpj.13988	≥4	Yes	SpCas9	DNA-stable	High	No
166	1	10.1111/tpj.13988	3	Yes	SpCas9	DNA-stable	High	No
166	1	10.1111/tpj.13988	3	Yes	SpCas9	DNA-stable	High	No
166	1	10.1111/tpj.13988	3	Yes	SpCas9	DNA-stable	High	No
166	2	10.1111/tpj.13988	≥4	Yes	SpCas9	DNA-stable	High	No
167	1	10.3389/fpls.2018.01533	≥4	Yes	SpCas9	DNA-stable	High	No
167	1	10.3389/fpls.2018.01533	≥4	Yes	SpCas9	DNA-stable	High	No
167	2	10.3389/fpls.2018.01533	≥4	Yes	SpCas9	DNA-stable	High	No
167	3	10.3389/fpls.2018.01533	2	Yes	SpCas9	DNA-stable	High	No
167	3	10.3389/fpls.2018.01533	2	Yes	SpCas9	DNA-stable	High	No
168	9	10.1186/s13059-018-1458-5	1	Yes	SpCas9	DNA-stable	High	Yes
168	9	10.1186/s13059-018-1458-5	1	Yes	SpCas9	DNA-stable	High	Yes
168	9	10.1186/s13059-018-1458-5	1	Yes	SpCas9	DNA-stable	High	Yes
168	9	10.1186/s13059-018-1458-5	1	Yes	SpCas9	DNA-stable	High	Yes
168	9	10.1186/s13059-018-1458-5	2	Yes	SpCas9	DNA-stable	High	Yes
168	9	10.1186/s13059-018-1458-5	3	Yes	SpCas9	DNA-stable	High	Yes
168	9	10.1186/s13059-018-1458-5	≥4	Yes	SpCas9	DNA-stable	High	No
168	9	10.1186/s13059-018-1458-5	≥4	Yes	SpCas9	DNA-stable	High	No
168	9	10.1186/s13059-018-1458-5	≥4	Yes	SpCas9	DNA-stable	High	No
168	9	10.1186/s13059-018-1458-5	≥4	Yes	SpCas9	DNA-stable	High	No
168	9	10.1186/s13059-018-1458-5	≥4	Yes	SpCas9	DNA-stable	High	No
168	9	10.1186/s13059-018-1458-5	≥4	Yes	SpCas9	DNA-stable	High	No
168	9	10.1186/s13059-018-1458-5	≥4	Yes	SpCas9	DNA-stable	High	No
168	9	10.1186/s13059-018-1458-5	≥4	Yes	SpCas9	DNA-stable	High	No
168	9	10.1186/s13059-018-1458-5	≥4	Yes	SpCas9	DNA-stable	High	No
171	1	10.1038/nbt.4202	3	Yes	SpCas9	DNA-stable	Low	No
171	1	10.1038/nbt.4202	3	Yes	SpCas9	DNA-stable	Low	No
171	1	10.1038/nbt.4202	≥4	Yes	SpCas9	DNA-stable	Low	No
171	1	10.1038/nbt.4202	≥4	Yes	SpCas9	DNA-stable	Low	No
171	1	10.1038/nbt.4202	≥4	Yes	SpCas9	DNA-stable	Low	No
171	1	10.1038/nbt.4202	≥4	Yes	SpCas9	DNA-stable	Low	No
171	1	10.1038/nbt.4202	≥4	Yes	SpCas9	DNA-stable	Low	No
171	1	10.1038/nbt.4202	≥4	Yes	SpCas9	DNA-stable	Low	No
171	1	10.1038/nbt.4202	≥4	Yes	SpCas9	DNA-stable	Low	No
171	2	10.1038/nbt.4202	≥4	Yes	SpCas9	DNA-stable	High	No
171	2	10.1038/nbt.4202	≥4	Yes	SpCas9	DNA-stable	High	No
171	2	10.1038/nbt.4202	≥4	Yes	SpCas9	DNA-stable	High	No
171	2	10.1038/nbt.4202	≥4	Yes	SpCas9	DNA-stable	High	No
171	2	10.1038/nbt.4202	≥4	Yes	SpCas9	DNA-stable	High	No
171	2	10.1038/nbt.4202	≥4	Yes	SpCas9	DNA-stable	High	No
171	2	10.1038/nbt.4202	≥4	Yes	SpCas9	DNA-stable	High	No
171	2	10.1038/nbt.4202	≥4	Yes	SpCas9	DNA-stable	High	No
171	2	10.1038/nbt.4202	≥4	Yes	SpCas9	DNA-stable	High	No
171	2	10.1038/nbt.4202	≥4	Yes	SpCas9	DNA-stable	High	No
171	3	10.1038/nbt.4202	≥4	Yes	SpCas9	DNA-stable	High	No
171	3	10.1038/nbt.4202	≥4	Yes	SpCas9	DNA-stable	High	No
171	3	10.1038/nbt.4202	≥4	Yes	SpCas9	DNA-stable	High	No
171	3	10.1038/nbt.4202	≥4	Yes	SpCas9	DNA-stable	High	No
171	3	10.1038/nbt.4202	≥4	Yes	SpCas9	DNA-stable	High	No
171	3	10.1038/nbt.4202	≥4	Yes	SpCas9	DNA-stable	High	No
171	3	10.1038/nbt.4202	≥4	Yes	SpCas9	DNA-stable	High	No
171	3	10.1038/nbt.4202	≥4	Yes	SpCas9	DNA-stable	High	No
171	4	10.1038/nbt.4202	3	Yes	SpCas9	DNA-stable	Low	No
171	4	10.1038/nbt.4202	3	Yes	SpCas9	DNA-stable	Low	No
171	4	10.1038/nbt.4202	3	Yes	SpCas9	DNA-stable	Low	No
171	4	10.1038/nbt.4202	3	Yes	SpCas9	DNA-stable	Low	No
171	4	10.1038/nbt.4202	2	Yes	SpCas9	DNA-stable	Low	No
171	4	10.1038/nbt.4202	2	Yes	SpCas9	DNA-stable	Low	No
171	4	10.1038/nbt.4202	2	Yes	SpCas9	DNA-stable	Low	No
172	2	10.1186/s12870-018-1496-x	1	Yes	SpCas9	DNA-stable	Low	No
173		10.1111/pbi.13088	2	Yes	SpCas9	DNA-stable	High	No
173		10.1111/pbi.13088	2	Yes	SpCas9	DNA-stable	High	No
173		10.1111/pbi.13088	2	Yes	SpCas9	DNA-stable	High	No
174		10.3389/fpls.2018.00842.s001	3	Yes	SpCas9	DNA-stable	Low	No
174		10.3389/fpls.2018.00842.s001	3	Yes	SpCas9	DNA-stable	Low	No
174		10.3389/fpls.2018.00842.s001	1	Yes	SpCas9	DNA-stable	Low	No
174		10.3389/fpls.2018.00842.s001	2	Yes	SpCas9	DNA-stable	Low	No
175	1	10.1007/s00299-018-2340-3	≥4	Yes	SpCas9	DNA-stable	High	No
175	3	10.1007/s00299-018-2340-3	3	Yes	SpCas9	DNA-stable	High	No
175	3	10.1007/s00299-018-2340-3	≥4	Yes	SpCas9	DNA-stable	High	No
176		10.3390/ijms19103000	3	Yes	SpCas9	DNA-stable	High	No
176		10.3390/ijms19103000	≥4	Yes	SpCas9	DNA-stable	High	No
176		10.3390/ijms19103000	≥4	Yes	SpCas9	DNA-stable	High	No
176		10.3390/ijms19103000	≥4	Yes	SpCas9	DNA-stable	High	No
176		10.3390/ijms19103000	≥4	Yes	SpCas9	DNA-stable	High	No
176		10.3390/ijms19103000	≥4	Yes	SpCas9	DNA-stable	High	No
176		10.3390/ijms19103000	≥4	Yes	SpCas9	DNA-stable	High	No
176		10.3390/ijms19103000	≥4	Yes	SpCas9	DNA-stable	High	No
176		10.3390/ijms19103000	≥4	Yes	SpCas9	DNA-stable	High	No
176		10.3390/ijms19103000	≥4	Yes	SpCas9	DNA-stable	High	No
176		10.3390/ijms19103000	≥4	Yes	SpCas9	DNA-stable	High	No
176		10.3390/ijms19103000	≥4	Yes	SpCas9	DNA-stable	High	No
176		10.3390/ijms19103000	≥4	Yes	SpCas9	DNA-stable	High	No
176		10.3390/ijms19103000	≥4	Yes	SpCas9	DNA-stable	High	No
176		10.3390/ijms19103000	≥4	Yes	SpCas9	DNA-stable	High	No
178	3	10.1038/nbt.4272	3	Yes	SpCas9	DNA-stable	Low	No
178	3	10.1038/nbt.4272	≥4	Yes	SpCas9	DNA-stable	Low	No
178	4	10.1038/nbt.4272	3	Yes	SpCas9	DNA-stable	High	No
179	1	10.1038/s41477-018-0321-8	1	Yes	SpCas9	DNA-stable	Low	No
179	2	10.1038/s41477-018-0321-8	1	Yes	Others	DNA-stable	Low	No
179	2	10.1038/s41477-018-0321-8	1	Yes	Others	DNA-stable	High	No
179	2	10.1038/s41477-018-0321-8	1	Yes	Others	DNA-stable	High	No
179	2	10.1038/s41477-018-0321-8	1	Yes	Others	DNA-stable	High	No
3	2	10.1007/s11032-016-0533-4	2	No	SpCas9	DNA-stable	Low	No
4	1	10.1111/pbi.12758	2	Yes	SpCas9	DNA-stable	Low	No
4	2	10.1111/pbi.12758	2	Yes	SpCas9	DNA-stable	High	No
6	1	10.1038/srep44304	2	No	SpCas9	DNA-stable	High	No
6	2	10.1038/srep44304	≥4	No	SpCas9	DNA-stable	Low	No

## Sheet: Excluded studies
Article number	Study number	DOI	Nuclease variant	Nuclease variant_Statstik	Number of mismatches	Reason	24	23	22	21	20	19	18	17	16	15	14	13	12	11	10	9	8	7	6	5	4	3	2	1	PAM	Position mismatch	Off-target identified	GC-content
150	2	10.1111/pbi.13020	CRISPR/SpCas9	DNA-stable	≥4	No detailed position of mismatch/es proximal to the PAM																											No	0.35
150	2	10.1111/pbi.13020	CRISPR/SpCas9	DNA-stable	≥4	No detailed position of mismatch/es proximal to the PAM																											No	0.35
150	2	10.1111/pbi.13020	CRISPR/SpCas9	DNA-stable	≥4	No detailed position of mismatch/es proximal to the PAM																											No	0.35
150	2	10.1111/pbi.13020	CRISPR/SpCas9	DNA-stable	≥4	No detailed position of mismatch/es proximal to the PAM																											No	0.35
150	2	10.1111/pbi.13020	CRISPR/SpCas9	DNA-stable	≥4	No detailed position of mismatch/es proximal to the PAM																											No	0.35
150	2	10.1111/pbi.13020	CRISPR/SpCas9	DNA-stable	≥4	No detailed position of mismatch/es proximal to the PAM																											No	0.35
150	2	10.1111/pbi.13020	CRISPR/SpCas9	DNA-stable	≥4	No detailed position of mismatch/es proximal to the PAM																											No	0.35
150	2	10.1111/pbi.13020	CRISPR/SpCas9	DNA-stable	≥4	No detailed position of mismatch/es proximal to the PAM																											No	0.35
150	2	10.1111/pbi.13020	CRISPR/SpCas9	DNA-stable	≥4	No detailed position of mismatch/es proximal to the PAM																											No	0.35
150	2	10.1111/pbi.13020	CRISPR/SpCas9	DNA-stable	≥4	No detailed position of mismatch/es proximal to the PAM																											No	0.35
150	2	10.1111/pbi.13020	CRISPR/SpCas9	DNA-stable	≥4	No detailed position of mismatch/es proximal to the PAM																											No	0.35
150	2	10.1111/pbi.13020	CRISPR/SpCas9	DNA-stable	≥4	No detailed position of mismatch/es proximal to the PAM																											No	0.35
150	2	10.1111/pbi.13020	CRISPR/SpCas9	DNA-stable	≥4	No detailed position of mismatch/es proximal to the PAM																											No	0.35
150	2	10.1111/pbi.13020	CRISPR/SpCas9	DNA-stable	≥4	No detailed position of mismatch/es proximal to the PAM																											No	0.35
150	2	10.1111/pbi.13020	CRISPR/SpCas9	DNA-stable	≥4	No detailed position of mismatch/es proximal to the PAM																											No	0.35
150	2	10.1111/pbi.13020	CRISPR/SpCas9	DNA-stable	≥4	No detailed position of mismatch/es proximal to the PAM																											No	0.35
150	2	10.1111/pbi.13020	CRISPR/SpCas9	DNA-stable	≥4	No detailed position of mismatch/es proximal to the PAM																											No	0.35
150	2	10.1111/pbi.13020	CRISPR/SpCas9	DNA-stable	≥4	No detailed position of mismatch/es proximal to the PAM																											No	0.35
150	2	10.1111/pbi.13020	CRISPR/SpCas9	DNA-stable	≥4	No detailed position of mismatch/es proximal to the PAM																											No	0.35
150	2	10.1111/pbi.13020	CRISPR/SpCas9	DNA-stable	≥4	No detailed position of mismatch/es proximal to the PAM																											No	0.35
150	2	10.1111/pbi.13020	CRISPR/SpCas9	DNA-stable	≥4	No detailed position of mismatch/es proximal to the PAM																											No	0.35
150	2	10.1111/pbi.13020	CRISPR/SpCas9	DNA-stable	≥4	No detailed position of mismatch/es proximal to the PAM																											No	0.35
150	2	10.1111/pbi.13020	CRISPR/SpCas9	DNA-stable	≥4	No detailed position of mismatch/es proximal to the PAM																											No	0.35
150	2	10.1111/pbi.13020	CRISPR/SpCas9	DNA-stable	≥4	No detailed position of mismatch/es proximal to the PAM																											No	0.35
150	2	10.1111/pbi.13020	CRISPR/SpCas9	DNA-stable	≥4	No detailed position of mismatch/es proximal to the PAM																											No	0.35
150	2	10.1111/pbi.13020	CRISPR/SpCas9	DNA-stable	≥4	No detailed position of mismatch/es proximal to the PAM																											No	0.35
150	2	10.1111/pbi.13020	CRISPR/SpCas9	DNA-stable	≥4	No detailed position of mismatch/es proximal to the PAM																											No	0.35
150	2	10.1111/pbi.13020	CRISPR/SpCas9	DNA-stable	≥4	No detailed position of mismatch/es proximal to the PAM																											No	0.35
150	2	10.1111/pbi.13020	CRISPR/SpCas9	DNA-stable	≥4	No detailed position of mismatch/es proximal to the PAM																											No	0.35
150	2	10.1111/pbi.13020	CRISPR/SpCas9	DNA-stable	≥4	No detailed position of mismatch/es proximal to the PAM																											No	0.35
150	2	10.1111/pbi.13020	CRISPR/SpCas9	DNA-stable	≥4	No detailed position of mismatch/es proximal to the PAM																											No	0.35
150	2	10.1111/pbi.13020	CRISPR/SpCas9	DNA-stable	≥4	No detailed position of mismatch/es proximal to the PAM																											No	0.35
150	2	10.1111/pbi.13020	CRISPR/SpCas9	DNA-stable	≥4	No detailed position of mismatch/es proximal to the PAM																											No	0.35
150	2	10.1111/pbi.13020	CRISPR/SpCas9	DNA-stable	≥4	No detailed position of mismatch/es proximal to the PAM																											No	0.35
150	2	10.1111/pbi.13020	CRISPR/SpCas9	DNA-stable	≥4	No detailed position of mismatch/es proximal to the PAM																											No	0.35
150	2	10.1111/pbi.13020	CRISPR/SpCas9	DNA-stable	≥4	No detailed position of mismatch/es proximal to the PAM																											No	0.35
150	2	10.1111/pbi.13020	CRISPR/SpCas9	DNA-stable	≥4	No detailed position of mismatch/es proximal to the PAM																											No	0.35
150	2	10.1111/pbi.13020	CRISPR/SpCas9	DNA-stable	≥4	No detailed position of mismatch/es proximal to the PAM																											No	0.35
150	2	10.1111/pbi.13020	CRISPR/SpCas9	DNA-stable	≥4	No detailed position of mismatch/es proximal to the PAM																											No	0.35
150	2	10.1111/pbi.13020	CRISPR/SpCas9	DNA-stable	≥4	No detailed position of mismatch/es proximal to the PAM																											No	0.35
150	2	10.1111/pbi.13020	CRISPR/SpCas9	DNA-stable	≥4	No detailed position of mismatch/es proximal to the PAM																											No	0.35
150	2	10.1111/pbi.13020	CRISPR/SpCas9	DNA-stable	≥4	No detailed position of mismatch/es proximal to the PAM																											No	0.35
150	2	10.1111/pbi.13020	CRISPR/SpCas9	DNA-stable	≥4	No detailed position of mismatch/es proximal to the PAM																											No	0.35
150	2	10.1111/pbi.13020	CRISPR/SpCas9	DNA-stable	≥4	No detailed position of mismatch/es proximal to the PAM																											No	0.35
150	2	10.1111/pbi.13020	CRISPR/SpCas9	DNA-stable	≥4	No detailed position of mismatch/es proximal to the PAM																											No	0.35
150	2	10.1111/pbi.13020	CRISPR/SpCas9	DNA-stable	≥4	No detailed position of mismatch/es proximal to the PAM																											No	0.35
150	2	10.1111/pbi.13020	CRISPR/SpCas9	DNA-stable	≥4	No detailed position of mismatch/es proximal to the PAM																											No	0.35
150	2	10.1111/pbi.13020	CRISPR/SpCas9	DNA-stable	≥4	No detailed position of mismatch/es proximal to the PAM																											No	0.35
150	2	10.1111/pbi.13020	CRISPR/SpCas9	DNA-stable	≥4	No detailed position of mismatch/es proximal to the PAM																											No	0.35
150	2	10.1111/pbi.13020	CRISPR/SpCas9	DNA-stable	≥4	No detailed position of mismatch/es proximal to the PAM																											No	0.35
150	2	10.1111/pbi.13020	CRISPR/SpCas9	DNA-stable	≥4	No detailed position of mismatch/es proximal to the PAM																											No	0.35
150	2	10.1111/pbi.13020	CRISPR/SpCas9	DNA-stable	≥4	No detailed position of mismatch/es proximal to the PAM																											No	0.35
150	2	10.1111/pbi.13020	CRISPR/SpCas9	DNA-stable	≥4	No detailed position of mismatch/es proximal to the PAM																											No	0.35
150	2	10.1111/pbi.13020	CRISPR/SpCas9	DNA-stable	≥4	No detailed position of mismatch/es proximal to the PAM																											No	0.35
150	2	10.1111/pbi.13020	CRISPR/SpCas9	DNA-stable	≥4	No detailed position of mismatch/es proximal to the PAM																											No	0.35
150	2	10.1111/pbi.13020	CRISPR/SpCas9	DNA-stable	≥4	No detailed position of mismatch/es proximal to the PAM																											No	0.35
150	2	10.1111/pbi.13020	CRISPR/SpCas9	DNA-stable	≥4	No detailed position of mismatch/es proximal to the PAM																											No	0.35
150	2	10.1111/pbi.13020	CRISPR/SpCas9	DNA-stable	≥4	No detailed position of mismatch/es proximal to the PAM																											No	0.35
150	2	10.1111/pbi.13020	CRISPR/SpCas9	DNA-stable	≥4	No detailed position of mismatch/es proximal to the PAM																											No	0.35
150	2	10.1111/pbi.13020	CRISPR/SpCas9	DNA-stable	≥4	No detailed position of mismatch/es proximal to the PAM																											No	0.35
150	2	10.1111/pbi.13020	CRISPR/SpCas9	DNA-stable	≥4	No detailed position of mismatch/es proximal to the PAM																											No	0.35
150	2	10.1111/pbi.13020	CRISPR/SpCas9	DNA-stable	≥4	No detailed position of mismatch/es proximal to the PAM																											No	0.35
150	2	10.1111/pbi.13020	CRISPR/SpCas9	DNA-stable	≥4	No detailed position of mismatch/es proximal to the PAM																											No	0.35
150	2	10.1111/pbi.13020	CRISPR/SpCas9	DNA-stable	≥4	No detailed position of mismatch/es proximal to the PAM																											No	0.35
150	2	10.1111/pbi.13020	CRISPR/SpCas9	DNA-stable	≥4	No detailed position of mismatch/es proximal to the PAM																											No	0.35
150	2	10.1111/pbi.13020	CRISPR/SpCas9	DNA-stable	≥4	No detailed position of mismatch/es proximal to the PAM																											No	0.35
150	2	10.1111/pbi.13020	CRISPR/SpCas9	DNA-stable	≥4	No detailed position of mismatch/es proximal to the PAM																											No	0.35
150	2	10.1111/pbi.13020	CRISPR/SpCas9	DNA-stable	≥4	No detailed position of mismatch/es proximal to the PAM																											No	0.35
150	2	10.1111/pbi.13020	CRISPR/SpCas9	DNA-stable	≥4	No detailed position of mismatch/es proximal to the PAM																											No	0.35
150	2	10.1111/pbi.13020	CRISPR/SpCas9	DNA-stable	≥4	No detailed position of mismatch/es proximal to the PAM																											No	0.35
150	2	10.1111/pbi.13020	CRISPR/SpCas9	DNA-stable	≥4	No detailed position of mismatch/es proximal to the PAM																											No	0.35
150	2	10.1111/pbi.13020	CRISPR/SpCas9	DNA-stable	≥4	No detailed position of mismatch/es proximal to the PAM																											No	0.35
150	2	10.1111/pbi.13020	CRISPR/SpCas9	DNA-stable	≥4	No detailed position of mismatch/es proximal to the PAM																											No	0.35
150	2	10.1111/pbi.13020	CRISPR/SpCas9	DNA-stable	≥4	No detailed position of mismatch/es proximal to the PAM																											No	0.35
150	2	10.1111/pbi.13020	CRISPR/SpCas9	DNA-stable	≥4	No detailed position of mismatch/es proximal to the PAM																											No	0.35
150	2	10.1111/pbi.13020	CRISPR/SpCas9	DNA-stable	≥4	No detailed position of mismatch/es proximal to the PAM																											No	0.35
150	2	10.1111/pbi.13020	CRISPR/SpCas9	DNA-stable	≥4	No detailed position of mismatch/es proximal to the PAM																											No	0.35
150	2	10.1111/pbi.13020	CRISPR/SpCas9	DNA-stable	≥4	No detailed position of mismatch/es proximal to the PAM																											No	0.35
150	2	10.1111/pbi.13020	CRISPR/SpCas9	DNA-stable	≥4	No detailed position of mismatch/es proximal to the PAM																											No	0.35
150	2	10.1111/pbi.13020	CRISPR/SpCas9	DNA-stable	≥4	No detailed position of mismatch/es proximal to the PAM																											No	0.35
150	2	10.1111/pbi.13020	CRISPR/SpCas9	DNA-stable	≥4	No detailed position of mismatch/es proximal to the PAM																											No	0.35
150	2	10.1111/pbi.13020	CRISPR/SpCas9	DNA-stable	≥4	No detailed position of mismatch/es proximal to the PAM																											No	0.35
150	2	10.1111/pbi.13020	CRISPR/SpCas9	DNA-stable	≥4	No detailed position of mismatch/es proximal to the PAM																											No	0.35
150	2	10.1111/pbi.13020	CRISPR/SpCas9	DNA-stable	≥4	No detailed position of mismatch/es proximal to the PAM																											No	0.35
150	2	10.1111/pbi.13020	CRISPR/SpCas9	DNA-stable	≥4	No detailed position of mismatch/es proximal to the PAM																											No	0.35
150	2	10.1111/pbi.13020	CRISPR/SpCas9	DNA-stable	≥4	No detailed position of mismatch/es proximal to the PAM																											No	0.35
150	2	10.1111/pbi.13020	CRISPR/SpCas9	DNA-stable	≥4	No detailed position of mismatch/es proximal to the PAM																											No	0.35
150	2	10.1111/pbi.13020	CRISPR/SpCas9	DNA-stable	≥4	No detailed position of mismatch/es proximal to the PAM																											No	0.35
150	2	10.1111/pbi.13020	CRISPR/SpCas9	DNA-stable	≥4	No detailed position of mismatch/es proximal to the PAM																											No	0.35
150	2	10.1111/pbi.13020	CRISPR/SpCas9	DNA-stable	≥4	No detailed position of mismatch/es proximal to the PAM																											No	0.35
150	2	10.1111/pbi.13020	CRISPR/SpCas9	DNA-stable	≥4	No detailed position of mismatch/es proximal to the PAM																											No	0.35
150	2	10.1111/pbi.13020	CRISPR/SpCas9	DNA-stable	≥4	No detailed position of mismatch/es proximal to the PAM																											No	0.35
150	2	10.1111/pbi.13020	CRISPR/SpCas9	DNA-stable	≥4	No detailed position of mismatch/es proximal to the PAM																											No	0.35
150	2	10.1111/pbi.13020	CRISPR/SpCas9	DNA-stable	≥4	No detailed position of mismatch/es proximal to the PAM																											No	0.35
150	2	10.1111/pbi.13020	CRISPR/SpCas9	DNA-stable	≥4	No detailed position of mismatch/es proximal to the PAM																											No	0.35
150	2	10.1111/pbi.13020	CRISPR/SpCas9	DNA-stable	≥4	No detailed position of mismatch/es proximal to the PAM																											No	0.35
150	2	10.1111/pbi.13020	CRISPR/SpCas9	DNA-stable	≥4	No detailed position of mismatch/es proximal to the PAM																											No	0.35
150	2	10.1111/pbi.13020	CRISPR/SpCas9	DNA-stable	≥4	No detailed position of mismatch/es proximal to the PAM																											No	0.35
150	2	10.1111/pbi.13020	CRISPR/SpCas9	DNA-stable	≥4	No detailed position of mismatch/es proximal to the PAM																											No	0.35
150	2	10.1111/pbi.13020	CRISPR/SpCas9	DNA-stable	≥4	No detailed position of mismatch/es proximal to the PAM																											No	0.35
150	2	10.1111/pbi.13020	CRISPR/SpCas9	DNA-stable	≥4	No detailed position of mismatch/es proximal to the PAM																											No	0.35
150	2	10.1111/pbi.13020	CRISPR/SpCas9	DNA-stable	≥4	No detailed position of mismatch/es proximal to the PAM																											No	0.35
150	2	10.1111/pbi.13020	CRISPR/SpCas9	DNA-stable	≥4	No detailed position of mismatch/es proximal to the PAM																											No	0.35
150	2	10.1111/pbi.13020	CRISPR/SpCas9	DNA-stable	≥4	No detailed position of mismatch/es proximal to the PAM																											No	0.35
150	2	10.1111/pbi.13020	CRISPR/SpCas9	DNA-stable	≥4	No detailed position of mismatch/es proximal to the PAM																											No	0.35
150	2	10.1111/pbi.13020	CRISPR/SpCas9	DNA-stable	≥4	No detailed position of mismatch/es proximal to the PAM																											No	0.35
150	2	10.1111/pbi.13020	CRISPR/SpCas9	DNA-stable	≥4	No detailed position of mismatch/es proximal to the PAM																											No	0.35
150	2	10.1111/pbi.13020	CRISPR/SpCas9	DNA-stable	≥4	No detailed position of mismatch/es proximal to the PAM																											No	0.35
150	2	10.1111/pbi.13020	CRISPR/SpCas9	DNA-stable	≥4	No detailed position of mismatch/es proximal to the PAM																											No	0.35
150	2	10.1111/pbi.13020	CRISPR/SpCas9	DNA-stable	≥4	No detailed position of mismatch/es proximal to the PAM																											No	0.35
150	2	10.1111/pbi.13020	CRISPR/SpCas9	DNA-stable	≥4	No detailed position of mismatch/es proximal to the PAM																											No	0.35
150	2	10.1111/pbi.13020	CRISPR/SpCas9	DNA-stable	≥4	No detailed position of mismatch/es proximal to the PAM																											No	0.35
150	2	10.1111/pbi.13020	CRISPR/SpCas9	DNA-stable	≥4	No detailed position of mismatch/es proximal to the PAM																											No	0.35
150	2	10.1111/pbi.13020	CRISPR/SpCas9	DNA-stable	≥4	No detailed position of mismatch/es proximal to the PAM																											No	0.35
150	2	10.1111/pbi.13020	CRISPR/SpCas9	DNA-stable	≥4	No detailed position of mismatch/es proximal to the PAM																											No	0.35
150	2	10.1111/pbi.13020	CRISPR/SpCas9	DNA-stable	≥4	No detailed position of mismatch/es proximal to the PAM																											No	0.35
150	2	10.1111/pbi.13020	CRISPR/SpCas9	DNA-stable	≥4	No detailed position of mismatch/es proximal to the PAM																											No	0.35
150	2	10.1111/pbi.13020	CRISPR/SpCas9	DNA-stable	≥4	No detailed position of mismatch/es proximal to the PAM																											No	0.35
150	2	10.1111/pbi.13020	CRISPR/SpCas9	DNA-stable	≥4	No detailed position of mismatch/es proximal to the PAM																											No	0.35
150	2	10.1111/pbi.13020	CRISPR/SpCas9	DNA-stable	≥4	No detailed position of mismatch/es proximal to the PAM																											No	0.35
150	2	10.1111/pbi.13020	CRISPR/SpCas9	DNA-stable	≥4	No detailed position of mismatch/es proximal to the PAM																											No	0.35
150	2	10.1111/pbi.13020	CRISPR/SpCas9	DNA-stable	≥4	No detailed position of mismatch/es proximal to the PAM																											No	0.35
150	2	10.1111/pbi.13020	CRISPR/SpCas9	DNA-stable	≥4	No detailed position of mismatch/es proximal to the PAM																											No	0.35
150	2	10.1111/pbi.13020	CRISPR/SpCas9	DNA-stable	≥4	No detailed position of mismatch/es proximal to the PAM																											No	0.35
150	2	10.1111/pbi.13020	CRISPR/SpCas9	DNA-stable	≥4	No detailed position of mismatch/es proximal to the PAM																											No	0.35
150	2	10.1111/pbi.13020	CRISPR/SpCas9	DNA-stable	≥4	No detailed position of mismatch/es proximal to the PAM																											No	0.35
150	2	10.1111/pbi.13020	CRISPR/SpCas9	DNA-stable	≥4	No detailed position of mismatch/es proximal to the PAM																											No	0.35
150	2	10.1111/pbi.13020	CRISPR/SpCas9	DNA-stable	≥4	No detailed position of mismatch/es proximal to the PAM																											No	0.35
150	2	10.1111/pbi.13020	CRISPR/SpCas9	DNA-stable	≥4	No detailed position of mismatch/es proximal to the PAM																											No	0.35
150	2	10.1111/pbi.13020	CRISPR/SpCas9	DNA-stable	≥4	No detailed position of mismatch/es proximal to the PAM																											No	0.35
150	2	10.1111/pbi.13020	CRISPR/SpCas9	DNA-stable	≥4	No detailed position of mismatch/es proximal to the PAM																											No	0.35
150	2	10.1111/pbi.13020	CRISPR/SpCas9	DNA-stable	≥4	No detailed position of mismatch/es proximal to the PAM																											No	0.35
150	2	10.1111/pbi.13020	CRISPR/SpCas9	DNA-stable	≥4	No detailed position of mismatch/es proximal to the PAM																											No	0.35
150	2	10.1111/pbi.13020	CRISPR/SpCas9	DNA-stable	≥4	No detailed position of mismatch/es proximal to the PAM																											No	0.35
150	2	10.1111/pbi.13020	CRISPR/SpCas9	DNA-stable	≥4	No detailed position of mismatch/es proximal to the PAM																											No	0.35
150	2	10.1111/pbi.13020	CRISPR/SpCas9	DNA-stable	≥4	No detailed position of mismatch/es proximal to the PAM																											No	0.35
150	2	10.1111/pbi.13020	CRISPR/SpCas9	DNA-stable	≥4	No detailed position of mismatch/es proximal to the PAM																											No	0.35
150	2	10.1111/pbi.13020	CRISPR/SpCas9	DNA-stable	≥4	No detailed position of mismatch/es proximal to the PAM																											No	0.35
150	2	10.1111/pbi.13020	CRISPR/SpCas9	DNA-stable	≥4	No detailed position of mismatch/es proximal to the PAM																											No	0.35
150	2	10.1111/pbi.13020	CRISPR/SpCas9	DNA-stable	≥4	No detailed position of mismatch/es proximal to the PAM																											No	0.35
150	2	10.1111/pbi.13020	CRISPR/SpCas9	DNA-stable	≥4	No detailed position of mismatch/es proximal to the PAM																											No	0.35
150	2	10.1111/pbi.13020	CRISPR/SpCas9	DNA-stable	≥4	No detailed position of mismatch/es proximal to the PAM																											No	0.35
150	2	10.1111/pbi.13020	CRISPR/SpCas9	DNA-stable	≥4	No detailed position of mismatch/es proximal to the PAM																											No	0.35
150	2	10.1111/pbi.13020	CRISPR/SpCas9	DNA-stable	≥4	No detailed position of mismatch/es proximal to the PAM																											No	0.35
150	2	10.1111/pbi.13020	CRISPR/SpCas9	DNA-stable	≥4	No detailed position of mismatch/es proximal to the PAM																											No	0.35
150	2	10.1111/pbi.13020	CRISPR/SpCas9	DNA-stable	≥4	No detailed position of mismatch/es proximal to the PAM																											No	0.35
150	2	10.1111/pbi.13020	CRISPR/SpCas9	DNA-stable	≥4	No detailed position of mismatch/es proximal to the PAM																											No	0.35
150	2	10.1111/pbi.13020	CRISPR/SpCas9	DNA-stable	≥4	No detailed position of mismatch/es proximal to the PAM																											No	0.35
150	2	10.1111/pbi.13020	CRISPR/SpCas9	DNA-stable	≥4	No detailed position of mismatch/es proximal to the PAM																											No	0.35
150	2	10.1111/pbi.13020	CRISPR/SpCas9	DNA-stable	≥4	No detailed position of mismatch/es proximal to the PAM																											No	0.35
150	2	10.1111/pbi.13020	CRISPR/SpCas9	DNA-stable	≥4	No detailed position of mismatch/es proximal to the PAM																											No	0.35
150	2	10.1111/pbi.13020	CRISPR/SpCas9	DNA-stable	≥4	No detailed position of mismatch/es proximal to the PAM																											No	0.35
150	2	10.1111/pbi.13020	CRISPR/SpCas9	DNA-stable	≥4	No detailed position of mismatch/es proximal to the PAM																											No	0.35
150	2	10.1111/pbi.13020	CRISPR/SpCas9	DNA-stable	≥4	No detailed position of mismatch/es proximal to the PAM																											No	0.35
150	2	10.1111/pbi.13020	CRISPR/SpCas9	DNA-stable	≥4	No detailed position of mismatch/es proximal to the PAM																											No	0.35
150	2	10.1111/pbi.13020	CRISPR/SpCas9	DNA-stable	≥4	No detailed position of mismatch/es proximal to the PAM																											No	0.35
150	2	10.1111/pbi.13020	CRISPR/SpCas9	DNA-stable	≥4	No detailed position of mismatch/es proximal to the PAM																											No	0.35
150	2	10.1111/pbi.13020	CRISPR/SpCas9	DNA-stable	≥4	No detailed position of mismatch/es proximal to the PAM																											No	0.35
150	2	10.1111/pbi.13020	CRISPR/SpCas9	DNA-stable	≥4	No detailed position of mismatch/es proximal to the PAM																											No	0.35
150	2	10.1111/pbi.13020	CRISPR/SpCas9	DNA-stable	≥4	No detailed position of mismatch/es proximal to the PAM																											No	0.35
150	2	10.1111/pbi.13020	CRISPR/SpCas9	DNA-stable	≥4	No detailed position of mismatch/es proximal to the PAM																											No	0.35
150	2	10.1111/pbi.13020	CRISPR/SpCas9	DNA-stable	≥4	No detailed position of mismatch/es proximal to the PAM																											No	0.35
150	2	10.1111/pbi.13020	CRISPR/SpCas9	DNA-stable	≥4	No detailed position of mismatch/es proximal to the PAM																											No	0.35
150	2	10.1111/pbi.13020	CRISPR/SpCas9	DNA-stable	≥4	No detailed position of mismatch/es proximal to the PAM																											No	0.35
150	2	10.1111/pbi.13020	CRISPR/SpCas9	DNA-stable	≥4	No detailed position of mismatch/es proximal to the PAM																											No	0.35
150	2	10.1111/pbi.13020	CRISPR/SpCas9	DNA-stable	≥4	No detailed position of mismatch/es proximal to the PAM																											No	0.35
150	2	10.1111/pbi.13020	CRISPR/SpCas9	DNA-stable	≥4	No detailed position of mismatch/es proximal to the PAM																											No	0.35
150	2	10.1111/pbi.13020	CRISPR/SpCas9	DNA-stable	≥4	No detailed position of mismatch/es proximal to the PAM																											No	0.35
150	2	10.1111/pbi.13020	CRISPR/SpCas9	DNA-stable	≥4	No detailed position of mismatch/es proximal to the PAM																											No	0.35
150	2	10.1111/pbi.13020	CRISPR/SpCas9	DNA-stable	≥4	No detailed position of mismatch/es proximal to the PAM																											No	0.35
150	2	10.1111/pbi.13020	CRISPR/SpCas9	DNA-stable	≥4	No detailed position of mismatch/es proximal to the PAM																											No	0.35
150	2	10.1111/pbi.13020	CRISPR/SpCas9	DNA-stable	≥4	No detailed position of mismatch/es proximal to the PAM																											No	0.35
150	2	10.1111/pbi.13020	CRISPR/SpCas9	DNA-stable	≥4	No detailed position of mismatch/es proximal to the PAM																											No	0.35
150	2	10.1111/pbi.13020	CRISPR/SpCas9	DNA-stable	≥4	No detailed position of mismatch/es proximal to the PAM																											No	0.35
150	2	10.1111/pbi.13020	CRISPR/SpCas9	DNA-stable	≥4	No detailed position of mismatch/es proximal to the PAM																											No	0.35
150	2	10.1111/pbi.13020	CRISPR/SpCas9	DNA-stable	≥4	No detailed position of mismatch/es proximal to the PAM																											No	0.35
150	2	10.1111/pbi.13020	CRISPR/SpCas9	DNA-stable	≥4	No detailed position of mismatch/es proximal to the PAM																											No	0.35
150	2	10.1111/pbi.13020	CRISPR/SpCas9	DNA-stable	≥4	No detailed position of mismatch/es proximal to the PAM																											No	0.35
150	2	10.1111/pbi.13020	CRISPR/SpCas9	DNA-stable	≥4	No detailed position of mismatch/es proximal to the PAM																											No	0.35
150	2	10.1111/pbi.13020	CRISPR/SpCas9	DNA-stable	≥4	No detailed position of mismatch/es proximal to the PAM																											No	0.35
150	2	10.1111/pbi.13020	CRISPR/SpCas9	DNA-stable	≥4	No detailed position of mismatch/es proximal to the PAM																											No	0.35
150	2	10.1111/pbi.13020	CRISPR/SpCas9	DNA-stable	≥4	No detailed position of mismatch/es proximal to the PAM																											No	0.35
150	2	10.1111/pbi.13020	CRISPR/SpCas9	DNA-stable	≥4	No detailed position of mismatch/es proximal to the PAM																											No	0.35
150	2	10.1111/pbi.13020	CRISPR/SpCas9	DNA-stable	≥4	No detailed position of mismatch/es proximal to the PAM																											No	0.35
150	2	10.1111/pbi.13020	CRISPR/SpCas9	DNA-stable	≥4	No detailed position of mismatch/es proximal to the PAM																											No	0.35
150	2	10.1111/pbi.13020	CRISPR/SpCas9	DNA-stable	≥4	No detailed position of mismatch/es proximal to the PAM																											No	0.35
150	2	10.1111/pbi.13020	CRISPR/SpCas9	DNA-stable	≥4	No detailed position of mismatch/es proximal to the PAM																											No	0.35
150	2	10.1111/pbi.13020	CRISPR/SpCas9	DNA-stable	≥4	No detailed position of mismatch/es proximal to the PAM																											No	0.35
150	2	10.1111/pbi.13020	CRISPR/SpCas9	DNA-stable	≥4	No detailed position of mismatch/es proximal to the PAM																											No	0.35
150	2	10.1111/pbi.13020	CRISPR/SpCas9	DNA-stable	≥4	No detailed position of mismatch/es proximal to the PAM																											No	0.35
150	2	10.1111/pbi.13020	CRISPR/SpCas9	DNA-stable	≥4	No detailed position of mismatch/es proximal to the PAM																											No	0.35
150	2	10.1111/pbi.13020	CRISPR/SpCas9	DNA-stable	≥4	No detailed position of mismatch/es proximal to the PAM																											No	0.35
150	2	10.1111/pbi.13020	CRISPR/SpCas9	DNA-stable	≥4	No detailed position of mismatch/es proximal to the PAM																											No	0.35
150	2	10.1111/pbi.13020	CRISPR/SpCas9	DNA-stable	≥4	No detailed position of mismatch/es proximal to the PAM																											No	0.35
150	2	10.1111/pbi.13020	CRISPR/SpCas9	DNA-stable	≥4	No detailed position of mismatch/es proximal to the PAM																											No	0.35
150	2	10.1111/pbi.13020	CRISPR/SpCas9	DNA-stable	≥4	No detailed position of mismatch/es proximal to the PAM																											No	0.35
150	2	10.1111/pbi.13020	CRISPR/SpCas9	DNA-stable	≥4	No detailed position of mismatch/es proximal to the PAM																											No	0.35
150	2	10.1111/pbi.13020	CRISPR/SpCas9	DNA-stable	≥4	No detailed position of mismatch/es proximal to the PAM																											No	0.35
150	2	10.1111/pbi.13020	CRISPR/SpCas9	DNA-stable	≥4	No detailed position of mismatch/es proximal to the PAM																											No	0.35
150	2	10.1111/pbi.13020	CRISPR/SpCas9	DNA-stable	≥4	No detailed position of mismatch/es proximal to the PAM																											No	0.35
150	2	10.1111/pbi.13020	CRISPR/SpCas9	DNA-stable	≥4	No detailed position of mismatch/es proximal to the PAM																											No	0.35
150	2	10.1111/pbi.13020	CRISPR/SpCas9	DNA-stable	≥4	No detailed position of mismatch/es proximal to the PAM																											No	0.35
150	2	10.1111/pbi.13020	CRISPR/SpCas9	DNA-stable	≥4	No detailed position of mismatch/es proximal to the PAM																											No	0.35
150	2	10.1111/pbi.13020	CRISPR/SpCas9	DNA-stable	≥4	No detailed position of mismatch/es proximal to the PAM																											No	0.35
150	2	10.1111/pbi.13020	CRISPR/SpCas9	DNA-stable	≥4	No detailed position of mismatch/es proximal to the PAM																											No	0.35
150	2	10.1111/pbi.13020	CRISPR/SpCas9	DNA-stable	≥4	No detailed position of mismatch/es proximal to the PAM																											No	0.35
150	2	10.1111/pbi.13020	CRISPR/SpCas9	DNA-stable	≥4	No detailed position of mismatch/es proximal to the PAM																											No	0.35
150	2	10.1111/pbi.13020	CRISPR/SpCas9	DNA-stable	≥4	No detailed position of mismatch/es proximal to the PAM																											No	0.35
150	2	10.1111/pbi.13020	CRISPR/SpCas9	DNA-stable	≥4	No detailed position of mismatch/es proximal to the PAM																											No	0.35
150	2	10.1111/pbi.13020	CRISPR/SpCas9	DNA-stable	≥4	No detailed position of mismatch/es proximal to the PAM																											No	0.35
150	2	10.1111/pbi.13020	CRISPR/SpCas9	DNA-stable	≥4	No detailed position of mismatch/es proximal to the PAM																											No	0.35
150	2	10.1111/pbi.13020	CRISPR/SpCas9	DNA-stable	≥4	No detailed position of mismatch/es proximal to the PAM																											No	0.35
150	2	10.1111/pbi.13020	CRISPR/SpCas9	DNA-stable	≥4	No detailed position of mismatch/es proximal to the PAM																											No	0.35
150	2	10.1111/pbi.13020	CRISPR/SpCas9	DNA-stable	≥4	No detailed position of mismatch/es proximal to the PAM																											No	0.35
150	2	10.1111/pbi.13020	CRISPR/SpCas9	DNA-stable	≥4	No detailed position of mismatch/es proximal to the PAM																											No	0.35
150	2	10.1111/pbi.13020	CRISPR/SpCas9	DNA-stable	≥4	No detailed position of mismatch/es proximal to the PAM																											No	0.35
150	2	10.1111/pbi.13020	CRISPR/SpCas9	DNA-stable	≥4	No detailed position of mismatch/es proximal to the PAM																											No	0.35
150	2	10.1111/pbi.13020	CRISPR/SpCas9	DNA-stable	≥4	No detailed position of mismatch/es proximal to the PAM																											No	0.35
150	2	10.1111/pbi.13020	CRISPR/SpCas9	DNA-stable	≥4	No detailed position of mismatch/es proximal to the PAM																											No	0.35
150	2	10.1111/pbi.13020	CRISPR/SpCas9	DNA-stable	≥4	No detailed position of mismatch/es proximal to the PAM																											No	0.35
150	2	10.1111/pbi.13020	CRISPR/SpCas9	DNA-stable	≥4	No detailed position of mismatch/es proximal to the PAM																											No	0.35
150	2	10.1111/pbi.13020	CRISPR/SpCas9	DNA-stable	≥4	No detailed position of mismatch/es proximal to the PAM																											No	0.35
150	2	10.1111/pbi.13020	CRISPR/SpCas9	DNA-stable	≥4	No detailed position of mismatch/es proximal to the PAM																											No	0.35
150	2	10.1111/pbi.13020	CRISPR/SpCas9	DNA-stable	≥4	No detailed position of mismatch/es proximal to the PAM																											No	0.35
150	2	10.1111/pbi.13020	CRISPR/SpCas9	DNA-stable	≥4	No detailed position of mismatch/es proximal to the PAM																											No	0.35
150	2	10.1111/pbi.13020	CRISPR/SpCas9	DNA-stable	≥4	No detailed position of mismatch/es proximal to the PAM																											No	0.35
150	2	10.1111/pbi.13020	CRISPR/SpCas9	DNA-stable	≥4	No detailed position of mismatch/es proximal to the PAM																											No	0.35
150	2	10.1111/pbi.13020	CRISPR/SpCas9	DNA-stable	≥4	No detailed position of mismatch/es proximal to the PAM																											No	0.35
150	2	10.1111/pbi.13020	CRISPR/SpCas9	DNA-stable	≥4	No detailed position of mismatch/es proximal to the PAM																											No	0.35
150	2	10.1111/pbi.13020	CRISPR/SpCas9	DNA-stable	≥4	No detailed position of mismatch/es proximal to the PAM																											No	0.35
150	2	10.1111/pbi.13020	CRISPR/SpCas9	DNA-stable	≥4	No detailed position of mismatch/es proximal to the PAM																											No	0.35
150	2	10.1111/pbi.13020	CRISPR/SpCas9	DNA-stable	≥4	No detailed position of mismatch/es proximal to the PAM																											No	0.35
150	2	10.1111/pbi.13020	CRISPR/SpCas9	DNA-stable	≥4	No detailed position of mismatch/es proximal to the PAM																											No	0.35
150	2	10.1111/pbi.13020	CRISPR/SpCas9	DNA-stable	≥4	No detailed position of mismatch/es proximal to the PAM																											No	0.35
150	2	10.1111/pbi.13020	CRISPR/SpCas9	DNA-stable	≥4	No detailed position of mismatch/es proximal to the PAM																											No	0.35
150	2	10.1111/pbi.13020	CRISPR/SpCas9	DNA-stable	≥4	No detailed position of mismatch/es proximal to the PAM																											No	0.35
150	2	10.1111/pbi.13020	CRISPR/SpCas9	DNA-stable	≥4	No detailed position of mismatch/es proximal to the PAM																											No	0.35
150	2	10.1111/pbi.13020	CRISPR/SpCas9	DNA-stable	≥4	No detailed position of mismatch/es proximal to the PAM																											No	0.35
150	2	10.1111/pbi.13020	CRISPR/SpCas9	DNA-stable	≥4	No detailed position of mismatch/es proximal to the PAM																											No	0.35
150	2	10.1111/pbi.13020	CRISPR/SpCas9	DNA-stable	≥4	No detailed position of mismatch/es proximal to the PAM																											No	0.35
150	2	10.1111/pbi.13020	CRISPR/SpCas9	DNA-stable	≥4	No detailed position of mismatch/es proximal to the PAM																											No	0.35
150	2	10.1111/pbi.13020	CRISPR/SpCas9	DNA-stable	≥4	No detailed position of mismatch/es proximal to the PAM																											No	0.35
150	2	10.1111/pbi.13020	CRISPR/SpCas9	DNA-stable	≥4	No detailed position of mismatch/es proximal to the PAM																											No	0.35
150	2	10.1111/pbi.13020	CRISPR/SpCas9	DNA-stable	≥4	No detailed position of mismatch/es proximal to the PAM																											No	0.35
150	2	10.1111/pbi.13020	CRISPR/SpCas9	DNA-stable	≥4	No detailed position of mismatch/es proximal to the PAM																											No	0.35
150	2	10.1111/pbi.13020	CRISPR/SpCas9	DNA-stable	≥4	No detailed position of mismatch/es proximal to the PAM																											No	0.35
150	2	10.1111/pbi.13020	CRISPR/SpCas9	DNA-stable	≥4	No detailed position of mismatch/es proximal to the PAM																											No	0.35
150	2	10.1111/pbi.13020	CRISPR/SpCas9	DNA-stable	≥4	No detailed position of mismatch/es proximal to the PAM																											No	0.35
150	2	10.1111/pbi.13020	CRISPR/SpCas9	DNA-stable	≥4	No detailed position of mismatch/es proximal to the PAM																											No	0.35
150	2	10.1111/pbi.13020	CRISPR/SpCas9	DNA-stable	≥4	No detailed position of mismatch/es proximal to the PAM																											No	0.35
150	2	10.1111/pbi.13020	CRISPR/SpCas9	DNA-stable	≥4	No detailed position of mismatch/es proximal to the PAM																											No	0.35
150	2	10.1111/pbi.13020	CRISPR/SpCas9	DNA-stable	≥4	No detailed position of mismatch/es proximal to the PAM																											No	0.35
150	2	10.1111/pbi.13020	CRISPR/SpCas9	DNA-stable	≥4	No detailed position of mismatch/es proximal to the PAM																											No	0.35
150	2	10.1111/pbi.13020	CRISPR/SpCas9	DNA-stable	≥4	No detailed position of mismatch/es proximal to the PAM																											No	0.35
150	2	10.1111/pbi.13020	CRISPR/SpCas9	DNA-stable	≥4	No detailed position of mismatch/es proximal to the PAM																											No	0.35
150	2	10.1111/pbi.13020	CRISPR/SpCas9	DNA-stable	≥4	No detailed position of mismatch/es proximal to the PAM																											No	0.35
150	2	10.1111/pbi.13020	CRISPR/SpCas9	DNA-stable	≥4	No detailed position of mismatch/es proximal to the PAM																											No	0.35
150	2	10.1111/pbi.13020	CRISPR/SpCas9	DNA-stable	≥4	No detailed position of mismatch/es proximal to the PAM																											No	0.35
150	2	10.1111/pbi.13020	CRISPR/SpCas9	DNA-stable	≥4	No detailed position of mismatch/es proximal to the PAM																											No	0.35
150	2	10.1111/pbi.13020	CRISPR/SpCas9	DNA-stable	≥4	No detailed position of mismatch/es proximal to the PAM																											No	0.35
150	2	10.1111/pbi.13020	CRISPR/SpCas9	DNA-stable	≥4	No detailed position of mismatch/es proximal to the PAM																											No	0.35
150	2	10.1111/pbi.13020	CRISPR/SpCas9	DNA-stable	≥4	No detailed position of mismatch/es proximal to the PAM																											No	0.35
150	2	10.1111/pbi.13020	CRISPR/SpCas9	DNA-stable	≥4	No detailed position of mismatch/es proximal to the PAM																											No	0.35
150	2	10.1111/pbi.13020	CRISPR/SpCas9	DNA-stable	≥4	No detailed position of mismatch/es proximal to the PAM																											No	0.35
150	2	10.1111/pbi.13020	CRISPR/SpCas9	DNA-stable	≥4	No detailed position of mismatch/es proximal to the PAM																											No	0.35
150	2	10.1111/pbi.13020	CRISPR/SpCas9	DNA-stable	≥4	No detailed position of mismatch/es proximal to the PAM																											No	0.35
150	2	10.1111/pbi.13020	CRISPR/SpCas9	DNA-stable	≥4	No detailed position of mismatch/es proximal to the PAM																											No	0.35
150	2	10.1111/pbi.13020	CRISPR/SpCas9	DNA-stable	≥4	No detailed position of mismatch/es proximal to the PAM																											No	0.35
150	2	10.1111/pbi.13020	CRISPR/SpCas9	DNA-stable	≥4	No detailed position of mismatch/es proximal to the PAM																											No	0.35
150	2	10.1111/pbi.13020	CRISPR/SpCas9	DNA-stable	≥4	No detailed position of mismatch/es proximal to the PAM																											No	0.35
150	2	10.1111/pbi.13020	CRISPR/SpCas9	DNA-stable	≥4	No detailed position of mismatch/es proximal to the PAM																											No	0.35
150	2	10.1111/pbi.13020	CRISPR/SpCas9	DNA-stable	≥4	No detailed position of mismatch/es proximal to the PAM																											No	0.35
150	2	10.1111/pbi.13020	CRISPR/SpCas9	DNA-stable	≥4	No detailed position of mismatch/es proximal to the PAM																											No	0.35
150	2	10.1111/pbi.13020	CRISPR/SpCas9	DNA-stable	≥4	No detailed position of mismatch/es proximal to the PAM																											No	0.35
150	2	10.1111/pbi.13020	CRISPR/SpCas9	DNA-stable	≥4	No detailed position of mismatch/es proximal to the PAM																											No	0.35
150	2	10.1111/pbi.13020	CRISPR/SpCas9	DNA-stable	≥4	No detailed position of mismatch/es proximal to the PAM																											No	0.35
150	2	10.1111/pbi.13020	CRISPR/SpCas9	DNA-stable	≥4	No detailed position of mismatch/es proximal to the PAM																											No	0.35
150	2	10.1111/pbi.13020	CRISPR/SpCas9	DNA-stable	≥4	No detailed position of mismatch/es proximal to the PAM																											No	0.35
150	2	10.1111/pbi.13020	CRISPR/SpCas9	DNA-stable	≥4	No detailed position of mismatch/es proximal to the PAM																											No	0.35
150	2	10.1111/pbi.13020	CRISPR/SpCas9	DNA-stable	≥4	No detailed position of mismatch/es proximal to the PAM																											No	0.35
150	2	10.1111/pbi.13020	CRISPR/SpCas9	DNA-stable	≥4	No detailed position of mismatch/es proximal to the PAM																											No	0.35
150	2	10.1111/pbi.13020	CRISPR/SpCas9	DNA-stable	≥4	No detailed position of mismatch/es proximal to the PAM																											No	0.35
150	2	10.1111/pbi.13020	CRISPR/SpCas9	DNA-stable	≥4	No detailed position of mismatch/es proximal to the PAM																											No	0.35
150	2	10.1111/pbi.13020	CRISPR/SpCas9	DNA-stable	≥4	No detailed position of mismatch/es proximal to the PAM																											No	0.35
150	2	10.1111/pbi.13020	CRISPR/SpCas9	DNA-stable	≥4	No detailed position of mismatch/es proximal to the PAM																											No	0.35
150	2	10.1111/pbi.13020	CRISPR/SpCas9	DNA-stable	≥4	No detailed position of mismatch/es proximal to the PAM																											No	0.35
150	2	10.1111/pbi.13020	CRISPR/SpCas9	DNA-stable	≥4	No detailed position of mismatch/es proximal to the PAM																											No	0.35
150	2	10.1111/pbi.13020	CRISPR/SpCas9	DNA-stable	≥4	No detailed position of mismatch/es proximal to the PAM																											No	0.35
150	2	10.1111/pbi.13020	CRISPR/SpCas9	DNA-stable	≥4	No detailed position of mismatch/es proximal to the PAM																											No	0.35
150	2	10.1111/pbi.13020	CRISPR/SpCas9	DNA-stable	≥4	No detailed position of mismatch/es proximal to the PAM																											No	0.35
150	2	10.1111/pbi.13020	CRISPR/SpCas9	DNA-stable	≥4	No detailed position of mismatch/es proximal to the PAM																											No	0.35
150	2	10.1111/pbi.13020	CRISPR/SpCas9	DNA-stable	≥4	No detailed position of mismatch/es proximal to the PAM																											No	0.35
150	2	10.1111/pbi.13020	CRISPR/SpCas9	DNA-stable	≥4	No detailed position of mismatch/es proximal to the PAM																											No	0.35
150	2	10.1111/pbi.13020	CRISPR/SpCas9	DNA-stable	≥4	No detailed position of mismatch/es proximal to the PAM																											No	0.35
150	2	10.1111/pbi.13020	CRISPR/SpCas9	DNA-stable	≥4	No detailed position of mismatch/es proximal to the PAM																											No	0.35
150	2	10.1111/pbi.13020	CRISPR/SpCas9	DNA-stable	≥4	No detailed position of mismatch/es proximal to the PAM																											No	0.35
150	2	10.1111/pbi.13020	CRISPR/SpCas9	DNA-stable	≥4	No detailed position of mismatch/es proximal to the PAM																											No	0.35
150	2	10.1111/pbi.13020	CRISPR/SpCas9	DNA-stable	≥4	No detailed position of mismatch/es proximal to the PAM																											No	0.35
150	2	10.1111/pbi.13020	CRISPR/SpCas9	DNA-stable	≥4	No detailed position of mismatch/es proximal to the PAM																											No	0.35
150	2	10.1111/pbi.13020	CRISPR/SpCas9	DNA-stable	≥4	No detailed position of mismatch/es proximal to the PAM																											No	0.35
150	2	10.1111/pbi.13020	CRISPR/SpCas9	DNA-stable	≥4	No detailed position of mismatch/es proximal to the PAM																											No	0.35
150	2	10.1111/pbi.13020	CRISPR/SpCas9	DNA-stable	≥4	No detailed position of mismatch/es proximal to the PAM																											No	0.35
150	2	10.1111/pbi.13020	CRISPR/SpCas9	DNA-stable	≥4	No detailed position of mismatch/es proximal to the PAM																											No	0.35
150	2	10.1111/pbi.13020	CRISPR/SpCas9	DNA-stable	≥4	No detailed position of mismatch/es proximal to the PAM																											No	0.35
150	2	10.1111/pbi.13020	CRISPR/SpCas9	DNA-stable	≥4	No detailed position of mismatch/es proximal to the PAM																											No	0.35
150	2	10.1111/pbi.13020	CRISPR/SpCas9	DNA-stable	≥4	No detailed position of mismatch/es proximal to the PAM																											No	0.35
150	2	10.1111/pbi.13020	CRISPR/SpCas9	DNA-stable	≥4	No detailed position of mismatch/es proximal to the PAM																											No	0.35
150	2	10.1111/pbi.13020	CRISPR/SpCas9	DNA-stable	≥4	No detailed position of mismatch/es proximal to the PAM																											No	0.35
150	2	10.1111/pbi.13020	CRISPR/SpCas9	DNA-stable	≥4	No detailed position of mismatch/es proximal to the PAM																											No	0.35
150	2	10.1111/pbi.13020	CRISPR/SpCas9	DNA-stable	≥4	No detailed position of mismatch/es proximal to the PAM																											No	0.35
150	2	10.1111/pbi.13020	CRISPR/SpCas9	DNA-stable	≥4	No detailed position of mismatch/es proximal to the PAM																											No	0.35
150	2	10.1111/pbi.13020	CRISPR/SpCas9	DNA-stable	≥4	No detailed position of mismatch/es proximal to the PAM																											No	0.35
150	2	10.1111/pbi.13020	CRISPR/SpCas9	DNA-stable	≥4	No detailed position of mismatch/es proximal to the PAM																											No	0.35
150	2	10.1111/pbi.13020	CRISPR/SpCas9	DNA-stable	≥4	No detailed position of mismatch/es proximal to the PAM																											No	0.35
150	2	10.1111/pbi.13020	CRISPR/SpCas9	DNA-stable	≥4	No detailed position of mismatch/es proximal to the PAM																											No	0.35
150	2	10.1111/pbi.13020	CRISPR/SpCas9	DNA-stable	≥4	No detailed position of mismatch/es proximal to the PAM																											No	0.35
150	2	10.1111/pbi.13020	CRISPR/SpCas9	DNA-stable	≥4	No detailed position of mismatch/es proximal to the PAM																											No	0.35
150	2	10.1111/pbi.13020	CRISPR/SpCas9	DNA-stable	≥4	No detailed position of mismatch/es proximal to the PAM																											No	0.35
150	2	10.1111/pbi.13020	CRISPR/SpCas9	DNA-stable	≥4	No detailed position of mismatch/es proximal to the PAM																											No	0.35
150	2	10.1111/pbi.13020	CRISPR/SpCas9	DNA-stable	≥4	No detailed position of mismatch/es proximal to the PAM																											No	0.35
150	2	10.1111/pbi.13020	CRISPR/SpCas9	DNA-stable	≥4	No detailed position of mismatch/es proximal to the PAM																											No	0.35
150	2	10.1111/pbi.13020	CRISPR/SpCas9	DNA-stable	≥4	No detailed position of mismatch/es proximal to the PAM																											No	0.35
150	2	10.1111/pbi.13020	CRISPR/SpCas9	DNA-stable	≥4	No detailed position of mismatch/es proximal to the PAM																											No	0.35
150	2	10.1111/pbi.13020	CRISPR/SpCas9	DNA-stable	≥4	No detailed position of mismatch/es proximal to the PAM																											No	0.35
150	2	10.1111/pbi.13020	CRISPR/SpCas9	DNA-stable	≥4	No detailed position of mismatch/es proximal to the PAM																											No	0.35
150	2	10.1111/pbi.13020	CRISPR/SpCas9	DNA-stable	≥4	No detailed position of mismatch/es proximal to the PAM																											No	0.35
150	2	10.1111/pbi.13020	CRISPR/SpCas9	DNA-stable	≥4	No detailed position of mismatch/es proximal to the PAM																											No	0.35
150	2	10.1111/pbi.13020	CRISPR/SpCas9	DNA-stable	≥4	No detailed position of mismatch/es proximal to the PAM																											No	0.35
150	2	10.1111/pbi.13020	CRISPR/SpCas9	DNA-stable	≥4	No detailed position of mismatch/es proximal to the PAM																											No	0.35
150	2	10.1111/pbi.13020	CRISPR/SpCas9	DNA-stable	≥4	No detailed position of mismatch/es proximal to the PAM																											No	0.35
150	2	10.1111/pbi.13020	CRISPR/SpCas9	DNA-stable	≥4	No detailed position of mismatch/es proximal to the PAM																											No	0.35
150	2	10.1111/pbi.13020	CRISPR/SpCas9	DNA-stable	≥4	No detailed position of mismatch/es proximal to the PAM																											No	0.35
150	2	10.1111/pbi.13020	CRISPR/SpCas9	DNA-stable	≥4	No detailed position of mismatch/es proximal to the PAM																											No	0.35
150	2	10.1111/pbi.13020	CRISPR/SpCas9	DNA-stable	≥4	No detailed position of mismatch/es proximal to the PAM																											No	0.35
150	2	10.1111/pbi.13020	CRISPR/SpCas9	DNA-stable	≥4	No detailed position of mismatch/es proximal to the PAM																											No	0.35
150	2	10.1111/pbi.13020	CRISPR/SpCas9	DNA-stable	≥4	No detailed position of mismatch/es proximal to the PAM																											No	0.35
150	2	10.1111/pbi.13020	CRISPR/SpCas9	DNA-stable	≥4	No detailed position of mismatch/es proximal to the PAM																											No	0.35
150	2	10.1111/pbi.13020	CRISPR/SpCas9	DNA-stable	≥4	No detailed position of mismatch/es proximal to the PAM																											No	0.35
150	2	10.1111/pbi.13020	CRISPR/SpCas9	DNA-stable	≥4	No detailed position of mismatch/es proximal to the PAM																											No	0.35
150	2	10.1111/pbi.13020	CRISPR/SpCas9	DNA-stable	≥4	No detailed position of mismatch/es proximal to the PAM																											No	0.35
150	2	10.1111/pbi.13020	CRISPR/SpCas9	DNA-stable	≥4	No detailed position of mismatch/es proximal to the PAM																											No	0.35
150	2	10.1111/pbi.13020	CRISPR/SpCas9	DNA-stable	≥4	No detailed position of mismatch/es proximal to the PAM																											No	0.35
150	2	10.1111/pbi.13020	CRISPR/SpCas9	DNA-stable	≥4	No detailed position of mismatch/es proximal to the PAM																											No	0.35
150	2	10.1111/pbi.13020	CRISPR/SpCas9	DNA-stable	≥4	No detailed position of mismatch/es proximal to the PAM																											No	0.35
150	2	10.1111/pbi.13020	CRISPR/SpCas9	DNA-stable	≥4	No detailed position of mismatch/es proximal to the PAM																											No	0.35
150	2	10.1111/pbi.13020	CRISPR/SpCas9	DNA-stable	≥4	No detailed position of mismatch/es proximal to the PAM																											No	0.35
150	2	10.1111/pbi.13020	CRISPR/SpCas9	DNA-stable	≥4	No detailed position of mismatch/es proximal to the PAM																											No	0.35
150	2	10.1111/pbi.13020	CRISPR/SpCas9	DNA-stable	≥4	No detailed position of mismatch/es proximal to the PAM																											No	0.35
150	2	10.1111/pbi.13020	CRISPR/SpCas9	DNA-stable	≥4	No detailed position of mismatch/es proximal to the PAM																											No	0.35
150	2	10.1111/pbi.13020	CRISPR/SpCas9	DNA-stable	≥4	No detailed position of mismatch/es proximal to the PAM																											No	0.35
150	2	10.1111/pbi.13020	CRISPR/SpCas9	DNA-stable	≥4	No detailed position of mismatch/es proximal to the PAM																											No	0.35
150	2	10.1111/pbi.13020	CRISPR/SpCas9	DNA-stable	≥4	No detailed position of mismatch/es proximal to the PAM																											No	0.35
150	2	10.1111/pbi.13020	CRISPR/SpCas9	DNA-stable	≥4	No detailed position of mismatch/es proximal to the PAM																											No	0.35
150	2	10.1111/pbi.13020	CRISPR/SpCas9	DNA-stable	≥4	No detailed position of mismatch/es proximal to the PAM																											No	0.35
150	2	10.1111/pbi.13020	CRISPR/SpCas9	DNA-stable	≥4	No detailed position of mismatch/es proximal to the PAM																											No	0.35
150	2	10.1111/pbi.13020	CRISPR/SpCas9	DNA-stable	≥4	No detailed position of mismatch/es proximal to the PAM																											No	0.35
150	2	10.1111/pbi.13020	CRISPR/SpCas9	DNA-stable	≥4	No detailed position of mismatch/es proximal to the PAM																											No	0.35
150	2	10.1111/pbi.13020	CRISPR/SpCas9	DNA-stable	≥4	No detailed position of mismatch/es proximal to the PAM																											No	0.35
150	2	10.1111/pbi.13020	CRISPR/SpCas9	DNA-stable	≥4	No detailed position of mismatch/es proximal to the PAM																											No	0.35
150	2	10.1111/pbi.13020	CRISPR/SpCas9	DNA-stable	≥4	No detailed position of mismatch/es proximal to the PAM																											No	0.35
150	2	10.1111/pbi.13020	CRISPR/SpCas9	DNA-stable	≥4	No detailed position of mismatch/es proximal to the PAM																											No	0.35
150	2	10.1111/pbi.13020	CRISPR/SpCas9	DNA-stable	≥4	No detailed position of mismatch/es proximal to the PAM																											No	0.35
150	2	10.1111/pbi.13020	CRISPR/SpCas9	DNA-stable	≥4	No detailed position of mismatch/es proximal to the PAM																											No	0.35
150	2	10.1111/pbi.13020	CRISPR/SpCas9	DNA-stable	≥4	No detailed position of mismatch/es proximal to the PAM																											No	0.35
150	2	10.1111/pbi.13020	CRISPR/SpCas9	DNA-stable	≥4	No detailed position of mismatch/es proximal to the PAM																											No	0.35
150	2	10.1111/pbi.13020	CRISPR/SpCas9	DNA-stable	≥4	No detailed position of mismatch/es proximal to the PAM																											No	0.35
150	2	10.1111/pbi.13020	CRISPR/SpCas9	DNA-stable	≥4	No detailed position of mismatch/es proximal to the PAM																											No	0.35
150	2	10.1111/pbi.13020	CRISPR/SpCas9	DNA-stable	≥4	No detailed position of mismatch/es proximal to the PAM																											No	0.35
150	2	10.1111/pbi.13020	CRISPR/SpCas9	DNA-stable	≥4	No detailed position of mismatch/es proximal to the PAM																											No	0.35
150	2	10.1111/pbi.13020	CRISPR/SpCas9	DNA-stable	≥4	No detailed position of mismatch/es proximal to the PAM																											No	0.35
150	2	10.1111/pbi.13020	CRISPR/SpCas9	DNA-stable	≥4	No detailed position of mismatch/es proximal to the PAM																											No	0.35
150	2	10.1111/pbi.13020	CRISPR/SpCas9	DNA-stable	≥4	No detailed position of mismatch/es proximal to the PAM																											No	0.35
150	2	10.1111/pbi.13020	CRISPR/SpCas9	DNA-stable	≥4	No detailed position of mismatch/es proximal to the PAM																											No	0.35
150	2	10.1111/pbi.13020	CRISPR/SpCas9	DNA-stable	≥4	No detailed position of mismatch/es proximal to the PAM																											No	0.35
150	2	10.1111/pbi.13020	CRISPR/SpCas9	DNA-stable	≥4	No detailed position of mismatch/es proximal to the PAM																											No	0.35
150	2	10.1111/pbi.13020	CRISPR/SpCas9	DNA-stable	≥4	No detailed position of mismatch/es proximal to the PAM																											No	0.35
150	2	10.1111/pbi.13020	CRISPR/SpCas9	DNA-stable	≥4	No detailed position of mismatch/es proximal to the PAM																											No	0.35
150	2	10.1111/pbi.13020	CRISPR/SpCas9	DNA-stable	≥4	No detailed position of mismatch/es proximal to the PAM																											No	0.35
150	2	10.1111/pbi.13020	CRISPR/SpCas9	DNA-stable	≥4	No detailed position of mismatch/es proximal to the PAM																											No	0.35
150	2	10.1111/pbi.13020	CRISPR/SpCas9	DNA-stable	≥4	No detailed position of mismatch/es proximal to the PAM																											No	0.35
150	2	10.1111/pbi.13020	CRISPR/SpCas9	DNA-stable	≥4	No detailed position of mismatch/es proximal to the PAM																											No	0.35
150	2	10.1111/pbi.13020	CRISPR/SpCas9	DNA-stable	≥4	No detailed position of mismatch/es proximal to the PAM																											No	0.35
150	2	10.1111/pbi.13020	CRISPR/SpCas9	DNA-stable	≥4	No detailed position of mismatch/es proximal to the PAM																											No	0.35
150	2	10.1111/pbi.13020	CRISPR/SpCas9	DNA-stable	≥4	No detailed position of mismatch/es proximal to the PAM																											No	0.35
150	2	10.1111/pbi.13020	CRISPR/SpCas9	DNA-stable	≥4	No detailed position of mismatch/es proximal to the PAM																											No	0.35
150	2	10.1111/pbi.13020	CRISPR/SpCas9	DNA-stable	≥4	No detailed position of mismatch/es proximal to the PAM																											No	0.35
150	2	10.1111/pbi.13020	CRISPR/SpCas9	DNA-stable	≥4	No detailed position of mismatch/es proximal to the PAM																											No	0.35
150	2	10.1111/pbi.13020	CRISPR/SpCas9	DNA-stable	≥4	No detailed position of mismatch/es proximal to the PAM																											No	0.35
150	2	10.1111/pbi.13020	CRISPR/SpCas9	DNA-stable	≥4	No detailed position of mismatch/es proximal to the PAM																											No	0.35
150	2	10.1111/pbi.13020	CRISPR/SpCas9	DNA-stable	≥4	No detailed position of mismatch/es proximal to the PAM																											No	0.35
150	2	10.1111/pbi.13020	CRISPR/SpCas9	DNA-stable	≥4	No detailed position of mismatch/es proximal to the PAM																											No	0.35
150	2	10.1111/pbi.13020	CRISPR/SpCas9	DNA-stable	≥4	No detailed position of mismatch/es proximal to the PAM																											No	0.35
150	2	10.1111/pbi.13020	CRISPR/SpCas9	DNA-stable	≥4	No detailed position of mismatch/es proximal to the PAM																											No	0.35
150	2	10.1111/pbi.13020	CRISPR/SpCas9	DNA-stable	≥4	No detailed position of mismatch/es proximal to the PAM																											No	0.35
150	2	10.1111/pbi.13020	CRISPR/SpCas9	DNA-stable	≥4	No detailed position of mismatch/es proximal to the PAM																											No	0.35
150	2	10.1111/pbi.13020	CRISPR/SpCas9	DNA-stable	≥4	No detailed position of mismatch/es proximal to the PAM																											No	0.35
150	2	10.1111/pbi.13020	CRISPR/SpCas9	DNA-stable	≥4	No detailed position of mismatch/es proximal to the PAM																											No	0.35
150	2	10.1111/pbi.13020	CRISPR/SpCas9	DNA-stable	≥4	No detailed position of mismatch/es proximal to the PAM																											No	0.35
150	2	10.1111/pbi.13020	CRISPR/SpCas9	DNA-stable	≥4	No detailed position of mismatch/es proximal to the PAM																											No	0.35
150	2	10.1111/pbi.13020	CRISPR/SpCas9	DNA-stable	≥4	No detailed position of mismatch/es proximal to the PAM																											No	0.35
150	2	10.1111/pbi.13020	CRISPR/SpCas9	DNA-stable	≥4	No detailed position of mismatch/es proximal to the PAM																											No	0.35
150	2	10.1111/pbi.13020	CRISPR/SpCas9	DNA-stable	≥4	No detailed position of mismatch/es proximal to the PAM																											No	0.35
150	2	10.1111/pbi.13020	CRISPR/SpCas9	DNA-stable	≥4	No detailed position of mismatch/es proximal to the PAM																											No	0.35
150	2	10.1111/pbi.13020	CRISPR/SpCas9	DNA-stable	≥4	No detailed position of mismatch/es proximal to the PAM																											No	0.35
150	2	10.1111/pbi.13020	CRISPR/SpCas9	DNA-stable	≥4	No detailed position of mismatch/es proximal to the PAM																											No	0.35
150	2	10.1111/pbi.13020	CRISPR/SpCas9	DNA-stable	≥4	No detailed position of mismatch/es proximal to the PAM																											No	0.35
150	2	10.1111/pbi.13020	CRISPR/SpCas9	DNA-stable	≥4	No detailed position of mismatch/es proximal to the PAM																											No	0.35
150	2	10.1111/pbi.13020	CRISPR/SpCas9	DNA-stable	≥4	No detailed position of mismatch/es proximal to the PAM																											No	0.35
150	2	10.1111/pbi.13020	CRISPR/SpCas9	DNA-stable	≥4	No detailed position of mismatch/es proximal to the PAM																											No	0.35
150	2	10.1111/pbi.13020	CRISPR/SpCas9	DNA-stable	≥4	No detailed position of mismatch/es proximal to the PAM																											No	0.35
150	2	10.1111/pbi.13020	CRISPR/SpCas9	DNA-stable	≥4	No detailed position of mismatch/es proximal to the PAM																											No	0.35
150	2	10.1111/pbi.13020	CRISPR/SpCas9	DNA-stable	≥4	No detailed position of mismatch/es proximal to the PAM																											No	0.35
150	2	10.1111/pbi.13020	CRISPR/SpCas9	DNA-stable	≥4	No detailed position of mismatch/es proximal to the PAM																											No	0.35
150	2	10.1111/pbi.13020	CRISPR/SpCas9	DNA-stable	≥4	No detailed position of mismatch/es proximal to the PAM																											No	0.35
150	2	10.1111/pbi.13020	CRISPR/SpCas9	DNA-stable	≥4	No detailed position of mismatch/es proximal to the PAM																											No	0.35
150	2	10.1111/pbi.13020	CRISPR/SpCas9	DNA-stable	≥4	No detailed position of mismatch/es proximal to the PAM																											No	0.35
150	2	10.1111/pbi.13020	CRISPR/SpCas9	DNA-stable	≥4	No detailed position of mismatch/es proximal to the PAM																											No	0.35
150	2	10.1111/pbi.13020	CRISPR/SpCas9	DNA-stable	≥4	No detailed position of mismatch/es proximal to the PAM																											No	0.35
150	2	10.1111/pbi.13020	CRISPR/SpCas9	DNA-stable	≥4	No detailed position of mismatch/es proximal to the PAM																											No	0.35
150	2	10.1111/pbi.13020	CRISPR/SpCas9	DNA-stable	≥4	No detailed position of mismatch/es proximal to the PAM																											No	0.35
150	2	10.1111/pbi.13020	CRISPR/SpCas9	DNA-stable	≥4	No detailed position of mismatch/es proximal to the PAM																											No	0.35
150	2	10.1111/pbi.13020	CRISPR/SpCas9	DNA-stable	≥4	No detailed position of mismatch/es proximal to the PAM																											No	0.35
150	2	10.1111/pbi.13020	CRISPR/SpCas9	DNA-stable	≥4	No detailed position of mismatch/es proximal to the PAM																											No	0.35
150	2	10.1111/pbi.13020	CRISPR/SpCas9	DNA-stable	≥4	No detailed position of mismatch/es proximal to the PAM																											No	0.35
150	2	10.1111/pbi.13020	CRISPR/SpCas9	DNA-stable	≥4	No detailed position of mismatch/es proximal to the PAM																											No	0.35
150	2	10.1111/pbi.13020	CRISPR/SpCas9	DNA-stable	≥4	No detailed position of mismatch/es proximal to the PAM																											No	0.35
150	2	10.1111/pbi.13020	CRISPR/SpCas9	DNA-stable	≥4	No detailed position of mismatch/es proximal to the PAM																											No	0.35
150	2	10.1111/pbi.13020	CRISPR/SpCas9	DNA-stable	≥4	No detailed position of mismatch/es proximal to the PAM																											No	0.35
150	2	10.1111/pbi.13020	CRISPR/SpCas9	DNA-stable	≥4	No detailed position of mismatch/es proximal to the PAM																											No	0.35
150	2	10.1111/pbi.13020	CRISPR/SpCas9	DNA-stable	≥4	No detailed position of mismatch/es proximal to the PAM																											No	0.35
150	2	10.1111/pbi.13020	CRISPR/SpCas9	DNA-stable	≥4	No detailed position of mismatch/es proximal to the PAM																											No	0.35
150	2	10.1111/pbi.13020	CRISPR/SpCas9	DNA-stable	≥4	No detailed position of mismatch/es proximal to the PAM																											No	0.35
150	2	10.1111/pbi.13020	CRISPR/SpCas9	DNA-stable	≥4	No detailed position of mismatch/es proximal to the PAM																											No	0.35
150	2	10.1111/pbi.13020	CRISPR/SpCas9	DNA-stable	≥4	No detailed position of mismatch/es proximal to the PAM																											No	0.35
150	2	10.1111/pbi.13020	CRISPR/SpCas9	DNA-stable	≥4	No detailed position of mismatch/es proximal to the PAM																											No	0.35
150	2	10.1111/pbi.13020	CRISPR/SpCas9	DNA-stable	≥4	No detailed position of mismatch/es proximal to the PAM																											No	0.35
150	2	10.1111/pbi.13020	CRISPR/SpCas9	DNA-stable	≥4	No detailed position of mismatch/es proximal to the PAM																											No	0.35
150	2	10.1111/pbi.13020	CRISPR/SpCas9	DNA-stable	≥4	No detailed position of mismatch/es proximal to the PAM																											No	0.35
150	2	10.1111/pbi.13020	CRISPR/SpCas9	DNA-stable	≥4	No detailed position of mismatch/es proximal to the PAM																											No	0.35
150	2	10.1111/pbi.13020	CRISPR/SpCas9	DNA-stable	≥4	No detailed position of mismatch/es proximal to the PAM																											No	0.35
150	2	10.1111/pbi.13020	CRISPR/SpCas9	DNA-stable	≥4	No detailed position of mismatch/es proximal to the PAM																											No	0.35
150	2	10.1111/pbi.13020	CRISPR/SpCas9	DNA-stable	≥4	No detailed position of mismatch/es proximal to the PAM																											No	0.35
150	2	10.1111/pbi.13020	CRISPR/SpCas9	DNA-stable	≥4	No detailed position of mismatch/es proximal to the PAM																											No	0.35
150	2	10.1111/pbi.13020	CRISPR/SpCas9	DNA-stable	≥4	No detailed position of mismatch/es proximal to the PAM																											No	0.35
150	2	10.1111/pbi.13020	CRISPR/SpCas9	DNA-stable	≥4	No detailed position of mismatch/es proximal to the PAM																											No	0.35
150	2	10.1111/pbi.13020	CRISPR/SpCas9	DNA-stable	≥4	No detailed position of mismatch/es proximal to the PAM																											No	0.35
150	2	10.1111/pbi.13020	CRISPR/SpCas9	DNA-stable	≥4	No detailed position of mismatch/es proximal to the PAM																											No	0.35
150	2	10.1111/pbi.13020	CRISPR/SpCas9	DNA-stable	≥4	No detailed position of mismatch/es proximal to the PAM																											No	0.35
150	2	10.1111/pbi.13020	CRISPR/SpCas9	DNA-stable	≥4	No detailed position of mismatch/es proximal to the PAM																											No	0.35
150	2	10.1111/pbi.13020	CRISPR/SpCas9	DNA-stable	≥4	No detailed position of mismatch/es proximal to the PAM																											No	0.35
150	2	10.1111/pbi.13020	CRISPR/SpCas9	DNA-stable	≥4	No detailed position of mismatch/es proximal to the PAM																											No	0.35
150	2	10.1111/pbi.13020	CRISPR/SpCas9	DNA-stable	≥4	No detailed position of mismatch/es proximal to the PAM																											No	0.35
150	2	10.1111/pbi.13020	CRISPR/SpCas9	DNA-stable	≥4	No detailed position of mismatch/es proximal to the PAM																											No	0.35
150	2	10.1111/pbi.13020	CRISPR/SpCas9	DNA-stable	≥4	No detailed position of mismatch/es proximal to the PAM																											No	0.35
150	2	10.1111/pbi.13020	CRISPR/SpCas9	DNA-stable	≥4	No detailed position of mismatch/es proximal to the PAM																											No	0.35
150	2	10.1111/pbi.13020	CRISPR/SpCas9	DNA-stable	≥4	No detailed position of mismatch/es proximal to the PAM																											No	0.35
150	2	10.1111/pbi.13020	CRISPR/SpCas9	DNA-stable	≥4	No detailed position of mismatch/es proximal to the PAM																											No	0.35
150	2	10.1111/pbi.13020	CRISPR/SpCas9	DNA-stable	≥4	No detailed position of mismatch/es proximal to the PAM																											No	0.35
150	2	10.1111/pbi.13020	CRISPR/SpCas9	DNA-stable	≥4	No detailed position of mismatch/es proximal to the PAM																											No	0.35
150	2	10.1111/pbi.13020	CRISPR/SpCas9	DNA-stable	≥4	No detailed position of mismatch/es proximal to the PAM																											No	0.35
150	2	10.1111/pbi.13020	CRISPR/SpCas9	DNA-stable	≥4	No detailed position of mismatch/es proximal to the PAM																											No	0.35
150	2	10.1111/pbi.13020	CRISPR/SpCas9	DNA-stable	≥4	No detailed position of mismatch/es proximal to the PAM																											No	0.35
150	2	10.1111/pbi.13020	CRISPR/SpCas9	DNA-stable	≥4	No detailed position of mismatch/es proximal to the PAM																											No	0.35
150	2	10.1111/pbi.13020	CRISPR/SpCas9	DNA-stable	≥4	No detailed position of mismatch/es proximal to the PAM																											No	0.35
150	2	10.1111/pbi.13020	CRISPR/SpCas9	DNA-stable	≥4	No detailed position of mismatch/es proximal to the PAM																											No	0.35
150	2	10.1111/pbi.13020	CRISPR/SpCas9	DNA-stable	≥4	No detailed position of mismatch/es proximal to the PAM																											No	0.35
150	2	10.1111/pbi.13020	CRISPR/SpCas9	DNA-stable	≥4	No detailed position of mismatch/es proximal to the PAM																											No	0.35
150	2	10.1111/pbi.13020	CRISPR/SpCas9	DNA-stable	≥4	No detailed position of mismatch/es proximal to the PAM																											No	0.35
150	2	10.1111/pbi.13020	CRISPR/SpCas9	DNA-stable	≥4	No detailed position of mismatch/es proximal to the PAM																											No	0.35
150	2	10.1111/pbi.13020	CRISPR/SpCas9	DNA-stable	≥4	No detailed position of mismatch/es proximal to the PAM																											No	0.35
150	2	10.1111/pbi.13020	CRISPR/SpCas9	DNA-stable	≥4	No detailed position of mismatch/es proximal to the PAM																											No	0.35
150	2	10.1111/pbi.13020	CRISPR/SpCas9	DNA-stable	≥4	No detailed position of mismatch/es proximal to the PAM																											No	0.35
150	2	10.1111/pbi.13020	CRISPR/SpCas9	DNA-stable	≥4	No detailed position of mismatch/es proximal to the PAM																											No	0.35
150	2	10.1111/pbi.13020	CRISPR/SpCas9	DNA-stable	≥4	No detailed position of mismatch/es proximal to the PAM																											No	0.35
150	2	10.1111/pbi.13020	CRISPR/SpCas9	DNA-stable	≥4	No detailed position of mismatch/es proximal to the PAM																											No	0.35
150	2	10.1111/pbi.13020	CRISPR/SpCas9	DNA-stable	≥4	No detailed position of mismatch/es proximal to the PAM																											No	0.35
150	2	10.1111/pbi.13020	CRISPR/SpCas9	DNA-stable	≥4	No detailed position of mismatch/es proximal to the PAM																											No	0.35
150	2	10.1111/pbi.13020	CRISPR/SpCas9	DNA-stable	≥4	No detailed position of mismatch/es proximal to the PAM																											No	0.35
150	2	10.1111/pbi.13020	CRISPR/SpCas9	DNA-stable	≥4	No detailed position of mismatch/es proximal to the PAM																											No	0.35
150	2	10.1111/pbi.13020	CRISPR/SpCas9	DNA-stable	≥4	No detailed position of mismatch/es proximal to the PAM																											No	0.35
150	2	10.1111/pbi.13020	CRISPR/SpCas9	DNA-stable	≥4	No detailed position of mismatch/es proximal to the PAM																											No	0.35
150	2	10.1111/pbi.13020	CRISPR/SpCas9	DNA-stable	≥4	No detailed position of mismatch/es proximal to the PAM																											No	0.35
150	2	10.1111/pbi.13020	CRISPR/SpCas9	DNA-stable	≥4	No detailed position of mismatch/es proximal to the PAM																											No	0.35
150	2	10.1111/pbi.13020	CRISPR/SpCas9	DNA-stable	≥4	No detailed position of mismatch/es proximal to the PAM																											No	0.35
150	2	10.1111/pbi.13020	CRISPR/SpCas9	DNA-stable	≥4	No detailed position of mismatch/es proximal to the PAM																											No	0.35
150	2	10.1111/pbi.13020	CRISPR/SpCas9	DNA-stable	≥4	No detailed position of mismatch/es proximal to the PAM																											No	0.35
150	2	10.1111/pbi.13020	CRISPR/SpCas9	DNA-stable	≥4	No detailed position of mismatch/es proximal to the PAM																											No	0.35
150	2	10.1111/pbi.13020	CRISPR/SpCas9	DNA-stable	≥4	No detailed position of mismatch/es proximal to the PAM																											No	0.35
150	2	10.1111/pbi.13020	CRISPR/SpCas9	DNA-stable	≥4	No detailed position of mismatch/es proximal to the PAM																											No	0.35
150	2	10.1111/pbi.13020	CRISPR/SpCas9	DNA-stable	≥4	No detailed position of mismatch/es proximal to the PAM																											No	0.35
150	2	10.1111/pbi.13020	CRISPR/SpCas9	DNA-stable	≥4	No detailed position of mismatch/es proximal to the PAM																											No	0.35
150	2	10.1111/pbi.13020	CRISPR/SpCas9	DNA-stable	≥4	No detailed position of mismatch/es proximal to the PAM																											No	0.35
150	2	10.1111/pbi.13020	CRISPR/SpCas9	DNA-stable	≥4	No detailed position of mismatch/es proximal to the PAM																											No	0.35
150	2	10.1111/pbi.13020	CRISPR/SpCas9	DNA-stable	≥4	No detailed position of mismatch/es proximal to the PAM																											No	0.35
150	2	10.1111/pbi.13020	CRISPR/SpCas9	DNA-stable	≥4	No detailed position of mismatch/es proximal to the PAM																											No	0.35
150	2	10.1111/pbi.13020	CRISPR/SpCas9	DNA-stable	≥4	No detailed position of mismatch/es proximal to the PAM																											No	0.35
150	2	10.1111/pbi.13020	CRISPR/SpCas9	DNA-stable	≥4	No detailed position of mismatch/es proximal to the PAM																											No	0.35
150	2	10.1111/pbi.13020	CRISPR/SpCas9	DNA-stable	≥4	No detailed position of mismatch/es proximal to the PAM																											No	0.35
150	2	10.1111/pbi.13020	CRISPR/SpCas9	DNA-stable	≥4	No detailed position of mismatch/es proximal to the PAM																											No	0.35
150	2	10.1111/pbi.13020	CRISPR/SpCas9	DNA-stable	≥4	No detailed position of mismatch/es proximal to the PAM																											No	0.35
150	2	10.1111/pbi.13020	CRISPR/SpCas9	DNA-stable	≥4	No detailed position of mismatch/es proximal to the PAM																											No	0.35
150	2	10.1111/pbi.13020	CRISPR/SpCas9	DNA-stable	≥4	No detailed position of mismatch/es proximal to the PAM																											No	0.35
150	2	10.1111/pbi.13020	CRISPR/SpCas9	DNA-stable	≥4	No detailed position of mismatch/es proximal to the PAM																											No	0.35
150	2	10.1111/pbi.13020	CRISPR/SpCas9	DNA-stable	≥4	No detailed position of mismatch/es proximal to the PAM																											No	0.35
150	2	10.1111/pbi.13020	CRISPR/SpCas9	DNA-stable	≥4	No detailed position of mismatch/es proximal to the PAM																											No	0.35
150	2	10.1111/pbi.13020	CRISPR/SpCas9	DNA-stable	≥4	No detailed position of mismatch/es proximal to the PAM																											No	0.35
150	2	10.1111/pbi.13020	CRISPR/SpCas9	DNA-stable	≥4	No detailed position of mismatch/es proximal to the PAM																											No	0.35
150	2	10.1111/pbi.13020	CRISPR/SpCas9	DNA-stable	≥4	No detailed position of mismatch/es proximal to the PAM																											No	0.35
150	2	10.1111/pbi.13020	CRISPR/SpCas9	DNA-stable	≥4	No detailed position of mismatch/es proximal to the PAM																											No	0.35
150	2	10.1111/pbi.13020	CRISPR/SpCas9	DNA-stable	≥4	No detailed position of mismatch/es proximal to the PAM																											No	0.35
150	2	10.1111/pbi.13020	CRISPR/SpCas9	DNA-stable	≥4	No detailed position of mismatch/es proximal to the PAM																											No	0.35
150	2	10.1111/pbi.13020	CRISPR/SpCas9	DNA-stable	≥4	No detailed position of mismatch/es proximal to the PAM																											No	0.35
150	2	10.1111/pbi.13020	CRISPR/SpCas9	DNA-stable	≥4	No detailed position of mismatch/es proximal to the PAM																											No	0.35
150	2	10.1111/pbi.13020	CRISPR/SpCas9	DNA-stable	≥4	No detailed position of mismatch/es proximal to the PAM																											No	0.35
150	2	10.1111/pbi.13020	CRISPR/SpCas9	DNA-stable	≥4	No detailed position of mismatch/es proximal to the PAM																											No	0.35
150	2	10.1111/pbi.13020	CRISPR/SpCas9	DNA-stable	≥4	No detailed position of mismatch/es proximal to the PAM																											No	0.35
150	2	10.1111/pbi.13020	CRISPR/SpCas9	DNA-stable	≥4	No detailed position of mismatch/es proximal to the PAM																											No	0.35
150	2	10.1111/pbi.13020	CRISPR/SpCas9	DNA-stable	≥4	No detailed position of mismatch/es proximal to the PAM																											No	0.35
150	2	10.1111/pbi.13020	CRISPR/SpCas9	DNA-stable	≥4	No detailed position of mismatch/es proximal to the PAM																											No	0.35
150	2	10.1111/pbi.13020	CRISPR/SpCas9	DNA-stable	≥4	No detailed position of mismatch/es proximal to the PAM																											No	0.35
150	2	10.1111/pbi.13020	CRISPR/SpCas9	DNA-stable	≥4	No detailed position of mismatch/es proximal to the PAM																											No	0.35
150	2	10.1111/pbi.13020	CRISPR/SpCas9	DNA-stable	≥4	No detailed position of mismatch/es proximal to the PAM																											No	0.35
150	2	10.1111/pbi.13020	CRISPR/SpCas9	DNA-stable	≥4	No detailed position of mismatch/es proximal to the PAM																											No	0.35
150	2	10.1111/pbi.13020	CRISPR/SpCas9	DNA-stable	≥4	No detailed position of mismatch/es proximal to the PAM																											No	0.35
150	2	10.1111/pbi.13020	CRISPR/SpCas9	DNA-stable	≥4	No detailed position of mismatch/es proximal to the PAM																											No	0.35
150	2	10.1111/pbi.13020	CRISPR/SpCas9	DNA-stable	≥4	No detailed position of mismatch/es proximal to the PAM																											No	0.35
150	2	10.1111/pbi.13020	CRISPR/SpCas9	DNA-stable	≥4	No detailed position of mismatch/es proximal to the PAM																											No	0.35
150	2	10.1111/pbi.13020	CRISPR/SpCas9	DNA-stable	≥4	No detailed position of mismatch/es proximal to the PAM																											No	0.35
150	2	10.1111/pbi.13020	CRISPR/SpCas9	DNA-stable	≥4	No detailed position of mismatch/es proximal to the PAM																											No	0.35
150	2	10.1111/pbi.13020	CRISPR/SpCas9	DNA-stable	≥4	No detailed position of mismatch/es proximal to the PAM																											No	0.35
150	2	10.1111/pbi.13020	CRISPR/SpCas9	DNA-stable	≥4	No detailed position of mismatch/es proximal to the PAM																											No	0.35
150	2	10.1111/pbi.13020	CRISPR/SpCas9	DNA-stable	≥4	No detailed position of mismatch/es proximal to the PAM																											No	0.35
150	2	10.1111/pbi.13020	CRISPR/SpCas9	DNA-stable	≥4	No detailed position of mismatch/es proximal to the PAM																											No	0.35
150	2	10.1111/pbi.13020	CRISPR/SpCas9	DNA-stable	≥4	No detailed position of mismatch/es proximal to the PAM																											No	0.35
150	2	10.1111/pbi.13020	CRISPR/SpCas9	DNA-stable	≥4	No detailed position of mismatch/es proximal to the PAM																											No	0.35
150	2	10.1111/pbi.13020	CRISPR/SpCas9	DNA-stable	≥4	No detailed position of mismatch/es proximal to the PAM																											No	0.35
150	2	10.1111/pbi.13020	CRISPR/SpCas9	DNA-stable	≥4	No detailed position of mismatch/es proximal to the PAM																											No	0.35
150	2	10.1111/pbi.13020	CRISPR/SpCas9	DNA-stable	≥4	No detailed position of mismatch/es proximal to the PAM																											No	0.35
150	2	10.1111/pbi.13020	CRISPR/SpCas9	DNA-stable	≥4	No detailed position of mismatch/es proximal to the PAM																											No	0.35
150	2	10.1111/pbi.13020	CRISPR/SpCas9	DNA-stable	≥4	No detailed position of mismatch/es proximal to the PAM																											No	0.35
150	2	10.1111/pbi.13020	CRISPR/SpCas9	DNA-stable	≥4	No detailed position of mismatch/es proximal to the PAM																											No	0.35
150	2	10.1111/pbi.13020	CRISPR/SpCas9	DNA-stable	≥4	No detailed position of mismatch/es proximal to the PAM																											No	0.35
150	2	10.1111/pbi.13020	CRISPR/SpCas9	DNA-stable	≥4	No detailed position of mismatch/es proximal to the PAM																											No	0.35
150	2	10.1111/pbi.13020	CRISPR/SpCas9	DNA-stable	≥4	No detailed position of mismatch/es proximal to the PAM																											No	0.35
150	2	10.1111/pbi.13020	CRISPR/SpCas9	DNA-stable	≥4	No detailed position of mismatch/es proximal to the PAM																											No	0.35
150	2	10.1111/pbi.13020	CRISPR/SpCas9	DNA-stable	≥4	No detailed position of mismatch/es proximal to the PAM																											No	0.35
150	2	10.1111/pbi.13020	CRISPR/SpCas9	DNA-stable	≥4	No detailed position of mismatch/es proximal to the PAM																											No	0.35
150	2	10.1111/pbi.13020	CRISPR/SpCas9	DNA-stable	≥4	No detailed position of mismatch/es proximal to the PAM																											No	0.35
150	2	10.1111/pbi.13020	CRISPR/SpCas9	DNA-stable	≥4	No detailed position of mismatch/es proximal to the PAM																											No	0.35
150	2	10.1111/pbi.13020	CRISPR/SpCas9	DNA-stable	≥4	No detailed position of mismatch/es proximal to the PAM																											No	0.35
150	2	10.1111/pbi.13020	CRISPR/SpCas9	DNA-stable	≥4	No detailed position of mismatch/es proximal to the PAM																											No	0.35
150	2	10.1111/pbi.13020	CRISPR/SpCas9	DNA-stable	≥4	No detailed position of mismatch/es proximal to the PAM																											No	0.35
150	2	10.1111/pbi.13020	CRISPR/SpCas9	DNA-stable	≥4	No detailed position of mismatch/es proximal to the PAM																											No	0.35
150	2	10.1111/pbi.13020	CRISPR/SpCas9	DNA-stable	≥4	No detailed position of mismatch/es proximal to the PAM																											No	0.35
150	2	10.1111/pbi.13020	CRISPR/SpCas9	DNA-stable	≥4	No detailed position of mismatch/es proximal to the PAM																											No	0.35
150	2	10.1111/pbi.13020	CRISPR/SpCas9	DNA-stable	≥4	No detailed position of mismatch/es proximal to the PAM																											No	0.35
150	2	10.1111/pbi.13020	CRISPR/SpCas9	DNA-stable	≥4	No detailed position of mismatch/es proximal to the PAM																											No	0.35
150	2	10.1111/pbi.13020	CRISPR/SpCas9	DNA-stable	≥4	No detailed position of mismatch/es proximal to the PAM																											No	0.35
150	2	10.1111/pbi.13020	CRISPR/SpCas9	DNA-stable	≥4	No detailed position of mismatch/es proximal to the PAM																											No	0.35
150	2	10.1111/pbi.13020	CRISPR/SpCas9	DNA-stable	≥4	No detailed position of mismatch/es proximal to the PAM																											No	0.35
150	2	10.1111/pbi.13020	CRISPR/SpCas9	DNA-stable	≥4	No detailed position of mismatch/es proximal to the PAM																											No	0.35
150	2	10.1111/pbi.13020	CRISPR/SpCas9	DNA-stable	≥4	No detailed position of mismatch/es proximal to the PAM																											No	0.35
150	2	10.1111/pbi.13020	CRISPR/SpCas9	DNA-stable	≥4	No detailed position of mismatch/es proximal to the PAM																											No	0.35
150	2	10.1111/pbi.13020	CRISPR/SpCas9	DNA-stable	≥4	No detailed position of mismatch/es proximal to the PAM																											No	0.35
150	2	10.1111/pbi.13020	CRISPR/SpCas9	DNA-stable	≥4	No detailed position of mismatch/es proximal to the PAM																											No	0.35
150	2	10.1111/pbi.13020	CRISPR/SpCas9	DNA-stable	≥4	No detailed position of mismatch/es proximal to the PAM																											No	0.35
150	2	10.1111/pbi.13020	CRISPR/SpCas9	DNA-stable	≥4	No detailed position of mismatch/es proximal to the PAM																											No	0.35
150	2	10.1111/pbi.13020	CRISPR/SpCas9	DNA-stable	≥4	No detailed position of mismatch/es proximal to the PAM																											No	0.35
150	2	10.1111/pbi.13020	CRISPR/SpCas9	DNA-stable	≥4	No detailed position of mismatch/es proximal to the PAM																											No	0.35
150	2	10.1111/pbi.13020	CRISPR/SpCas9	DNA-stable	≥4	No detailed position of mismatch/es proximal to the PAM																											No	0.35
150	2	10.1111/pbi.13020	CRISPR/SpCas9	DNA-stable	≥4	No detailed position of mismatch/es proximal to the PAM																											No	0.35
150	2	10.1111/pbi.13020	CRISPR/SpCas9	DNA-stable	≥4	No detailed position of mismatch/es proximal to the PAM																											No	0.35
150	2	10.1111/pbi.13020	CRISPR/SpCas9	DNA-stable	≥4	No detailed position of mismatch/es proximal to the PAM																											No	0.35
150	2	10.1111/pbi.13020	CRISPR/SpCas9	DNA-stable	≥4	No detailed position of mismatch/es proximal to the PAM																											No	0.35
150	2	10.1111/pbi.13020	CRISPR/SpCas9	DNA-stable	≥4	No detailed position of mismatch/es proximal to the PAM																											No	0.35
150	2	10.1111/pbi.13020	CRISPR/SpCas9	DNA-stable	≥4	No detailed position of mismatch/es proximal to the PAM																											No	0.35
150	2	10.1111/pbi.13020	CRISPR/SpCas9	DNA-stable	≥4	No detailed position of mismatch/es proximal to the PAM																											No	0.35
150	2	10.1111/pbi.13020	CRISPR/SpCas9	DNA-stable	≥4	No detailed position of mismatch/es proximal to the PAM																											No	0.35
150	2	10.1111/pbi.13020	CRISPR/SpCas9	DNA-stable	≥4	No detailed position of mismatch/es proximal to the PAM																											No	0.35
150	2	10.1111/pbi.13020	CRISPR/SpCas9	DNA-stable	≥4	No detailed position of mismatch/es proximal to the PAM																											No	0.35
150	2	10.1111/pbi.13020	CRISPR/SpCas9	DNA-stable	≥4	No detailed position of mismatch/es proximal to the PAM																											No	0.35
150	2	10.1111/pbi.13020	CRISPR/SpCas9	DNA-stable	≥4	No detailed position of mismatch/es proximal to the PAM																											No	0.35
150	2	10.1111/pbi.13020	CRISPR/SpCas9	DNA-stable	≥4	No detailed position of mismatch/es proximal to the PAM																											No	0.35
150	2	10.1111/pbi.13020	CRISPR/SpCas9	DNA-stable	≥4	No detailed position of mismatch/es proximal to the PAM																											No	0.35
150	2	10.1111/pbi.13020	CRISPR/SpCas9	DNA-stable	≥4	No detailed position of mismatch/es proximal to the PAM																											No	0.35
150	2	10.1111/pbi.13020	CRISPR/SpCas9	DNA-stable	≥4	No detailed position of mismatch/es proximal to the PAM																											No	0.35
150	2	10.1111/pbi.13020	CRISPR/SpCas9	DNA-stable	≥4	No detailed position of mismatch/es proximal to the PAM																											No	0.35
150	2	10.1111/pbi.13020	CRISPR/SpCas9	DNA-stable	≥4	No detailed position of mismatch/es proximal to the PAM																											No	0.35
150	2	10.1111/pbi.13020	CRISPR/SpCas9	DNA-stable	≥4	No detailed position of mismatch/es proximal to the PAM																											No	0.35
150	2	10.1111/pbi.13020	CRISPR/SpCas9	DNA-stable	≥4	No detailed position of mismatch/es proximal to the PAM																											No	0.35
150	2	10.1111/pbi.13020	CRISPR/SpCas9	DNA-stable	≥4	No detailed position of mismatch/es proximal to the PAM																											No	0.35
150	2	10.1111/pbi.13020	CRISPR/SpCas9	DNA-stable	≥4	No detailed position of mismatch/es proximal to the PAM																											No	0.35
150	2	10.1111/pbi.13020	CRISPR/SpCas9	DNA-stable	≥4	No detailed position of mismatch/es proximal to the PAM																											No	0.35
150	2	10.1111/pbi.13020	CRISPR/SpCas9	DNA-stable	≥4	No detailed position of mismatch/es proximal to the PAM																											No	0.35
150	2	10.1111/pbi.13020	CRISPR/SpCas9	DNA-stable	≥4	No detailed position of mismatch/es proximal to the PAM																											No	0.35
150	2	10.1111/pbi.13020	CRISPR/SpCas9	DNA-stable	≥4	No detailed position of mismatch/es proximal to the PAM																											No	0.35
150	2	10.1111/pbi.13020	CRISPR/SpCas9	DNA-stable	≥4	No detailed position of mismatch/es proximal to the PAM																											No	0.35
150	2	10.1111/pbi.13020	CRISPR/SpCas9	DNA-stable	≥4	No detailed position of mismatch/es proximal to the PAM																											No	0.35
150	2	10.1111/pbi.13020	CRISPR/SpCas9	DNA-stable	≥4	No detailed position of mismatch/es proximal to the PAM																											No	0.35
150	2	10.1111/pbi.13020	CRISPR/SpCas9	DNA-stable	≥4	No detailed position of mismatch/es proximal to the PAM																											No	0.35
150	2	10.1111/pbi.13020	CRISPR/SpCas9	DNA-stable	≥4	No detailed position of mismatch/es proximal to the PAM																											No	0.35
168	4	10.1186/s13059-018-1458-5	CRISPR/SpCas9	DNA-stable	≥4	No detailed position of mismatch/es proximal to the PAM																											No	0.7
168	4	10.1186/s13059-018-1458-5	CRISPR/SpCas9	DNA-stable	≥4	No detailed position of mismatch/es proximal to the PAM																											No	0.7
168	4	10.1186/s13059-018-1458-5	CRISPR/SpCas9	DNA-stable	≥4	No detailed position of mismatch/es proximal to the PAM																											No	0.7
168	4	10.1186/s13059-018-1458-5	CRISPR/SpCas9	DNA-stable	≥4	No detailed position of mismatch/es proximal to the PAM																											No	0.7
168	4	10.1186/s13059-018-1458-5	CRISPR/SpCas9	DNA-stable	≥4	No detailed position of mismatch/es proximal to the PAM																											No	0.7
168	4	10.1186/s13059-018-1458-5	CRISPR/SpCas9	DNA-stable	≥4	No detailed position of mismatch/es proximal to the PAM																											No	0.7
168	4	10.1186/s13059-018-1458-5	CRISPR/SpCas9	DNA-stable	≥4	No detailed position of mismatch/es proximal to the PAM																											No	0.7
168	4	10.1186/s13059-018-1458-5	CRISPR/SpCas9	DNA-stable	≥4	No detailed position of mismatch/es proximal to the PAM																											No	0.7
168	4	10.1186/s13059-018-1458-5	CRISPR/SpCas9	DNA-stable	≥4	No detailed position of mismatch/es proximal to the PAM																											No	0.7
168	4	10.1186/s13059-018-1458-5	CRISPR/SpCas9	DNA-stable	≥4	No detailed position of mismatch/es proximal to the PAM																											No	0.7
168	4	10.1186/s13059-018-1458-5	CRISPR/SpCas9	DNA-stable	≥4	No detailed position of mismatch/es proximal to the PAM																											No	0.7
168	4	10.1186/s13059-018-1458-5	CRISPR/SpCas9	DNA-stable	≥4	No detailed position of mismatch/es proximal to the PAM																											No	0.7
168	4	10.1186/s13059-018-1458-5	CRISPR/SpCas9	DNA-stable	≥4	No detailed position of mismatch/es proximal to the PAM																											No	0.7
168	4	10.1186/s13059-018-1458-5	CRISPR/SpCas9	DNA-stable	≥4	No detailed position of mismatch/es proximal to the PAM																											No	0.7
168	4	10.1186/s13059-018-1458-5	CRISPR/SpCas9	DNA-stable	≥4	No detailed position of mismatch/es proximal to the PAM																											No	0.7
168	4	10.1186/s13059-018-1458-5	CRISPR/SpCas9	DNA-stable	≥4	No detailed position of mismatch/es proximal to the PAM																											No	0.7
168	4	10.1186/s13059-018-1458-5	CRISPR/SpCas9	DNA-stable	≥4	No detailed position of mismatch/es proximal to the PAM																											No	0.7
168	4	10.1186/s13059-018-1458-5	CRISPR/SpCas9	DNA-stable	≥4	No detailed position of mismatch/es proximal to the PAM																											No	0.7
168	4	10.1186/s13059-018-1458-5	CRISPR/SpCas9	DNA-stable	≥4	No detailed position of mismatch/es proximal to the PAM																											No	0.7
168	4	10.1186/s13059-018-1458-5	CRISPR/SpCas9	DNA-stable	≥4	No detailed position of mismatch/es proximal to the PAM																											No	0.7
168	4	10.1186/s13059-018-1458-5	CRISPR/SpCas9	DNA-stable	≥4	No detailed position of mismatch/es proximal to the PAM																											No	0.7
168	4	10.1186/s13059-018-1458-5	CRISPR/SpCas9	DNA-stable	≥4	No detailed position of mismatch/es proximal to the PAM																											No	0.7
168	4	10.1186/s13059-018-1458-5	CRISPR/SpCas9	DNA-stable	≥4	No detailed position of mismatch/es proximal to the PAM																											No	0.7
168	4	10.1186/s13059-018-1458-5	CRISPR/SpCas9	DNA-stable	≥4	No detailed position of mismatch/es proximal to the PAM																											No	0.7
168	4	10.1186/s13059-018-1458-5	CRISPR/SpCas9	DNA-stable	≥4	No detailed position of mismatch/es proximal to the PAM																											No	0.7
168	4	10.1186/s13059-018-1458-5	CRISPR/SpCas9	DNA-stable	≥4	No detailed position of mismatch/es proximal to the PAM																											No	0.7
168	4	10.1186/s13059-018-1458-5	CRISPR/SpCas9	DNA-stable	≥4	No detailed position of mismatch/es proximal to the PAM																											No	0.7
168	4	10.1186/s13059-018-1458-5	CRISPR/SpCas9	DNA-stable	≥4	No detailed position of mismatch/es proximal to the PAM																											No	0.7
168	4	10.1186/s13059-018-1458-5	CRISPR/SpCas9	DNA-stable	≥4	No detailed position of mismatch/es proximal to the PAM																											No	0.7
168	6	10.1186/s13059-018-1458-5	CRISPR/SpCas9	DNA-stable	≥4	No detailed position of mismatch/es proximal to the PAM																											No	0.7
168	6	10.1186/s13059-018-1458-5	CRISPR/SpCas9	DNA-stable	≥4	No detailed position of mismatch/es proximal to the PAM																											No	0.7
168	6	10.1186/s13059-018-1458-5	CRISPR/SpCas9	DNA-stable	≥4	No detailed position of mismatch/es proximal to the PAM																											No	0.7
168	6	10.1186/s13059-018-1458-5	CRISPR/SpCas9	DNA-stable	≥4	No detailed position of mismatch/es proximal to the PAM																											No	0.7
168	6	10.1186/s13059-018-1458-5	CRISPR/SpCas9	DNA-stable	≥4	No detailed position of mismatch/es proximal to the PAM																											No	0.7
168	6	10.1186/s13059-018-1458-5	CRISPR/SpCas9	DNA-stable	≥4	No detailed position of mismatch/es proximal to the PAM																											No	0.7
168	6	10.1186/s13059-018-1458-5	CRISPR/SpCas9	DNA-stable	≥4	No detailed position of mismatch/es proximal to the PAM																											No	0.7
168	6	10.1186/s13059-018-1458-5	CRISPR/SpCas9	DNA-stable	≥4	No detailed position of mismatch/es proximal to the PAM																											No	0.7
168	6	10.1186/s13059-018-1458-5	CRISPR/SpCas9	DNA-stable	≥4	No detailed position of mismatch/es proximal to the PAM																											No	0.7
168	6	10.1186/s13059-018-1458-5	CRISPR/SpCas9	DNA-stable	≥4	No detailed position of mismatch/es proximal to the PAM																											No	0.7
168	6	10.1186/s13059-018-1458-5	CRISPR/SpCas9	DNA-stable	≥4	No detailed position of mismatch/es proximal to the PAM																											No	0.7
168	6	10.1186/s13059-018-1458-5	CRISPR/SpCas9	DNA-stable	≥4	No detailed position of mismatch/es proximal to the PAM																											No	0.7
168	6	10.1186/s13059-018-1458-5	CRISPR/SpCas9	DNA-stable	≥4	No detailed position of mismatch/es proximal to the PAM																											No	0.7
168	6	10.1186/s13059-018-1458-5	CRISPR/SpCas9	DNA-stable	≥4	No detailed position of mismatch/es proximal to the PAM																											No	0.7
168	6	10.1186/s13059-018-1458-5	CRISPR/SpCas9	DNA-stable	≥4	No detailed position of mismatch/es proximal to the PAM																											No	0.7
150	2	10.1111/pbi.13020	CRISPR/SpCas9	DNA-stable	≥4	No detailed position of mismatch/es proximal to the PAM																											No	0.35
150	2	10.1111/pbi.13020	CRISPR/SpCas9	DNA-stable	≥4	No detailed position of mismatch/es proximal to the PAM																											No	0.35
150	2	10.1111/pbi.13020	CRISPR/SpCas9	DNA-stable	≥4	No detailed position of mismatch/es proximal to the PAM																											No	0.35
150	2	10.1111/pbi.13020	CRISPR/SpCas9	DNA-stable	≥4	No detailed position of mismatch/es proximal to the PAM																											No	0.35
150	2	10.1111/pbi.13020	CRISPR/SpCas9	DNA-stable	≥4	No detailed position of mismatch/es proximal to the PAM																											No	0.35
150	2	10.1111/pbi.13020	CRISPR/SpCas9	DNA-stable	≥4	No detailed position of mismatch/es proximal to the PAM																											No	0.35
150	2	10.1111/pbi.13020	CRISPR/SpCas9	DNA-stable	≥4	No detailed position of mismatch/es proximal to the PAM																											No	0.35
150	2	10.1111/pbi.13020	CRISPR/SpCas9	DNA-stable	≥4	No detailed position of mismatch/es proximal to the PAM																											No	0.35
150	2	10.1111/pbi.13020	CRISPR/SpCas9	DNA-stable	≥4	No detailed position of mismatch/es proximal to the PAM																											No	0.35
150	4	10.1111/pbi.13020	CRISPR/SpCas9	DNA-stable	≥4	No detailed position of mismatch/es proximal to the PAM																											No	0.71
150	4	10.1111/pbi.13020	CRISPR/SpCas9	DNA-stable	≥4	No detailed position of mismatch/es proximal to the PAM																											No	0.71
150	4	10.1111/pbi.13020	CRISPR/SpCas9	DNA-stable	≥4	No detailed position of mismatch/es proximal to the PAM																											No	0.71
150	4	10.1111/pbi.13020	CRISPR/SpCas9	DNA-stable	≥4	No detailed position of mismatch/es proximal to the PAM																											No	0.71
150	2	10.1111/pbi.13020	CRISPR/SpCas9	DNA-stable	≥4	No detailed position of mismatch/es proximal to the PAM																											No	0.35
150	2	10.1111/pbi.13020	CRISPR/SpCas9	DNA-stable	≥4	No detailed position of mismatch/es proximal to the PAM																											No	0.35
150	2	10.1111/pbi.13020	CRISPR/SpCas9	DNA-stable	≥4	No detailed position of mismatch/es proximal to the PAM																											No	0.35
150	2	10.1111/pbi.13020	CRISPR/SpCas9	DNA-stable	≥4	No detailed position of mismatch/es proximal to the PAM																											No	0.35
150	2	10.1111/pbi.13020	CRISPR/SpCas9	DNA-stable	≥4	No detailed position of mismatch/es proximal to the PAM																											No	0.35
150	2	10.1111/pbi.13020	CRISPR/SpCas9	DNA-stable	≥4	No detailed position of mismatch/es proximal to the PAM																											No	0.35
150	2	10.1111/pbi.13020	CRISPR/SpCas9	DNA-stable	≥4	No detailed position of mismatch/es proximal to the PAM																											No	0.35
150	2	10.1111/pbi.13020	CRISPR/SpCas9	DNA-stable	≥4	No detailed position of mismatch/es proximal to the PAM																											No	0.35
150	2	10.1111/pbi.13020	CRISPR/SpCas9	DNA-stable	≥4	No detailed position of mismatch/es proximal to the PAM																											No	0.35
150	2	10.1111/pbi.13020	CRISPR/SpCas9	DNA-stable	≥4	No detailed position of mismatch/es proximal to the PAM																											No	0.35
150	2	10.1111/pbi.13020	CRISPR/SpCas9	DNA-stable	≥4	No detailed position of mismatch/es proximal to the PAM																											No	0.35
150	2	10.1111/pbi.13020	CRISPR/SpCas9	DNA-stable	≥4	No detailed position of mismatch/es proximal to the PAM																											No	0.35
150	2	10.1111/pbi.13020	CRISPR/SpCas9	DNA-stable	≥4	No detailed position of mismatch/es proximal to the PAM																											No	0.35
150	2	10.1111/pbi.13020	CRISPR/SpCas9	DNA-stable	≥4	No detailed position of mismatch/es proximal to the PAM																											No	0.35
150	2	10.1111/pbi.13020	CRISPR/SpCas9	DNA-stable	≥4	No detailed position of mismatch/es proximal to the PAM																											No	0.35
150	2	10.1111/pbi.13020	CRISPR/SpCas9	DNA-stable	≥4	No detailed position of mismatch/es proximal to the PAM																											No	0.35
150	2	10.1111/pbi.13020	CRISPR/SpCas9	DNA-stable	≥4	No detailed position of mismatch/es proximal to the PAM																											No	0.35
150	2	10.1111/pbi.13020	CRISPR/SpCas9	DNA-stable	≥4	No detailed position of mismatch/es proximal to the PAM																											No	0.35
150	2	10.1111/pbi.13020	CRISPR/SpCas9	DNA-stable	≥4	No detailed position of mismatch/es proximal to the PAM																											No	0.35
150	2	10.1111/pbi.13020	CRISPR/SpCas9	DNA-stable	≥4	No detailed position of mismatch/es proximal to the PAM																											No	0.35
150	4	10.1111/pbi.13020	CRISPR/SpCas9	DNA-stable	≥4	No detailed position of mismatch/es proximal to the PAM																											No	0.71
150	4	10.1111/pbi.13020	CRISPR/SpCas9	DNA-stable	≥4	No detailed position of mismatch/es proximal to the PAM																											No	0.71
150	4	10.1111/pbi.13020	CRISPR/SpCas9	DNA-stable	≥4	No detailed position of mismatch/es proximal to the PAM																											No	0.71
150	4	10.1111/pbi.13020	CRISPR/SpCas9	DNA-stable	≥4	No detailed position of mismatch/es proximal to the PAM																											No	0.71
150	4	10.1111/pbi.13020	CRISPR/SpCas9	DNA-stable	≥4	No detailed position of mismatch/es proximal to the PAM																											No	0.71
150	2	10.1111/pbi.13020	CRISPR/SpCas9	DNA-stable	≥4	No detailed position of mismatch/es proximal to the PAM																											No	0.35
150	2	10.1111/pbi.13020	CRISPR/SpCas9	DNA-stable	≥4	No detailed position of mismatch/es proximal to the PAM																											No	0.35
150	2	10.1111/pbi.13020	CRISPR/SpCas9	DNA-stable	≥4	No detailed position of mismatch/es proximal to the PAM																											No	0.35
150	2	10.1111/pbi.13020	CRISPR/SpCas9	DNA-stable	≥4	No detailed position of mismatch/es proximal to the PAM																											No	0.35
150	2	10.1111/pbi.13020	CRISPR/SpCas9	DNA-stable	≥4	No detailed position of mismatch/es proximal to the PAM																											No	0.35
150	2	10.1111/pbi.13020	CRISPR/SpCas9	DNA-stable	≥4	No detailed position of mismatch/es proximal to the PAM																											No	0.35
150	2	10.1111/pbi.13020	CRISPR/SpCas9	DNA-stable	≥4	No detailed position of mismatch/es proximal to the PAM																											No	0.35
150	2	10.1111/pbi.13020	CRISPR/SpCas9	DNA-stable	≥4	No detailed position of mismatch/es proximal to the PAM																											No	0.35
150	2	10.1111/pbi.13020	CRISPR/SpCas9	DNA-stable	≥4	No detailed position of mismatch/es proximal to the PAM																											No	0.35
150	2	10.1111/pbi.13020	CRISPR/SpCas9	DNA-stable	≥4	No detailed position of mismatch/es proximal to the PAM																											No	0.35
150	2	10.1111/pbi.13020	CRISPR/SpCas9	DNA-stable	≥4	No detailed position of mismatch/es proximal to the PAM																											No	0.35
150	2	10.1111/pbi.13020	CRISPR/SpCas9	DNA-stable	≥4	No detailed position of mismatch/es proximal to the PAM																											No	0.35
150	2	10.1111/pbi.13020	CRISPR/SpCas9	DNA-stable	≥4	No detailed position of mismatch/es proximal to the PAM																											No	0.35
150	2	10.1111/pbi.13020	CRISPR/SpCas9	DNA-stable	≥4	No detailed position of mismatch/es proximal to the PAM																											No	0.35
150	2	10.1111/pbi.13020	CRISPR/SpCas9	DNA-stable	≥4	No detailed position of mismatch/es proximal to the PAM																											No	0.35
150	2	10.1111/pbi.13020	CRISPR/SpCas9	DNA-stable	≥4	No detailed position of mismatch/es proximal to the PAM																											No	0.35
150	2	10.1111/pbi.13020	CRISPR/SpCas9	DNA-stable	≥4	No detailed position of mismatch/es proximal to the PAM																											No	0.35
150	2	10.1111/pbi.13020	CRISPR/SpCas9	DNA-stable	≥4	No detailed position of mismatch/es proximal to the PAM																											No	0.35
150	2	10.1111/pbi.13020	CRISPR/SpCas9	DNA-stable	≥4	No detailed position of mismatch/es proximal to the PAM																											No	0.35
150	2	10.1111/pbi.13020	CRISPR/SpCas9	DNA-stable	≥4	No detailed position of mismatch/es proximal to the PAM																											No	0.35
150	2	10.1111/pbi.13020	CRISPR/SpCas9	DNA-stable	≥4	No detailed position of mismatch/es proximal to the PAM																											No	0.35
150	2	10.1111/pbi.13020	CRISPR/SpCas9	DNA-stable	≥4	No detailed position of mismatch/es proximal to the PAM																											No	0.35
150	2	10.1111/pbi.13020	CRISPR/SpCas9	DNA-stable	≥4	No detailed position of mismatch/es proximal to the PAM																											No	0.35
150	2	10.1111/pbi.13020	CRISPR/SpCas9	DNA-stable	≥4	No detailed position of mismatch/es proximal to the PAM																											No	0.35
150	2	10.1111/pbi.13020	CRISPR/SpCas9	DNA-stable	≥4	No detailed position of mismatch/es proximal to the PAM																											No	0.35
150	2	10.1111/pbi.13020	CRISPR/SpCas9	DNA-stable	≥4	No detailed position of mismatch/es proximal to the PAM																											No	0.35
150	2	10.1111/pbi.13020	CRISPR/SpCas9	DNA-stable	≥4	No detailed position of mismatch/es proximal to the PAM																											No	0.35
150	2	10.1111/pbi.13020	CRISPR/SpCas9	DNA-stable	≥4	No detailed position of mismatch/es proximal to the PAM																											No	0.35
150	2	10.1111/pbi.13020	CRISPR/SpCas9	DNA-stable	≥4	No detailed position of mismatch/es proximal to the PAM																											No	0.35
150	2	10.1111/pbi.13020	CRISPR/SpCas9	DNA-stable	≥4	No detailed position of mismatch/es proximal to the PAM																											No	0.35
150	2	10.1111/pbi.13020	CRISPR/SpCas9	DNA-stable	≥4	No detailed position of mismatch/es proximal to the PAM																											No	0.35
150	2	10.1111/pbi.13020	CRISPR/SpCas9	DNA-stable	≥4	No detailed position of mismatch/es proximal to the PAM																											No	0.35
150	2	10.1111/pbi.13020	CRISPR/SpCas9	DNA-stable	≥4	No detailed position of mismatch/es proximal to the PAM																											No	0.35
150	2	10.1111/pbi.13020	CRISPR/SpCas9	DNA-stable	≥4	No detailed position of mismatch/es proximal to the PAM																											No	0.35
150	2	10.1111/pbi.13020	CRISPR/SpCas9	DNA-stable	≥4	No detailed position of mismatch/es proximal to the PAM																											No	0.35
150	2	10.1111/pbi.13020	CRISPR/SpCas9	DNA-stable	≥4	No detailed position of mismatch/es proximal to the PAM																											No	0.35
150	2	10.1111/pbi.13020	CRISPR/SpCas9	DNA-stable	≥4	No detailed position of mismatch/es proximal to the PAM																											No	0.35
150	2	10.1111/pbi.13020	CRISPR/SpCas9	DNA-stable	≥4	No detailed position of mismatch/es proximal to the PAM																											No	0.35
150	2	10.1111/pbi.13020	CRISPR/SpCas9	DNA-stable	≥4	No detailed position of mismatch/es proximal to the PAM																											No	0.35
150	2	10.1111/pbi.13020	CRISPR/SpCas9	DNA-stable	≥4	No detailed position of mismatch/es proximal to the PAM																											No	0.35
150	2	10.1111/pbi.13020	CRISPR/SpCas9	DNA-stable	≥4	No detailed position of mismatch/es proximal to the PAM																											No	0.35
150	2	10.1111/pbi.13020	CRISPR/SpCas9	DNA-stable	≥4	No detailed position of mismatch/es proximal to the PAM																											No	0.35
150	2	10.1111/pbi.13020	CRISPR/SpCas9	DNA-stable	≥4	No detailed position of mismatch/es proximal to the PAM																											No	0.35
150	2	10.1111/pbi.13020	CRISPR/SpCas9	DNA-stable	≥4	No detailed position of mismatch/es proximal to the PAM																											No	0.35
150	2	10.1111/pbi.13020	CRISPR/SpCas9	DNA-stable	≥4	No detailed position of mismatch/es proximal to the PAM																											No	0.35
150	2	10.1111/pbi.13020	CRISPR/SpCas9	DNA-stable	≥4	No detailed position of mismatch/es proximal to the PAM																											No	0.35
150	2	10.1111/pbi.13020	CRISPR/SpCas9	DNA-stable	≥4	No detailed position of mismatch/es proximal to the PAM																											No	0.35
150	2	10.1111/pbi.13020	CRISPR/SpCas9	DNA-stable	≥4	No detailed position of mismatch/es proximal to the PAM																											No	0.35
150	2	10.1111/pbi.13020	CRISPR/SpCas9	DNA-stable	≥4	No detailed position of mismatch/es proximal to the PAM																											No	0.35
150	2	10.1111/pbi.13020	CRISPR/SpCas9	DNA-stable	≥4	No detailed position of mismatch/es proximal to the PAM																											No	0.35
150	2	10.1111/pbi.13020	CRISPR/SpCas9	DNA-stable	≥4	No detailed position of mismatch/es proximal to the PAM																											No	0.35
150	2	10.1111/pbi.13020	CRISPR/SpCas9	DNA-stable	≥4	No detailed position of mismatch/es proximal to the PAM																											No	0.35
150	2	10.1111/pbi.13020	CRISPR/SpCas9	DNA-stable	≥4	No detailed position of mismatch/es proximal to the PAM																											No	0.35
150	2	10.1111/pbi.13020	CRISPR/SpCas9	DNA-stable	≥4	No detailed position of mismatch/es proximal to the PAM																											No	0.35
150	2	10.1111/pbi.13020	CRISPR/SpCas9	DNA-stable	≥4	No detailed position of mismatch/es proximal to the PAM																											No	0.35
150	2	10.1111/pbi.13020	CRISPR/SpCas9	DNA-stable	≥4	No detailed position of mismatch/es proximal to the PAM																											No	0.35
150	2	10.1111/pbi.13020	CRISPR/SpCas9	DNA-stable	≥4	No detailed position of mismatch/es proximal to the PAM																											No	0.35
150	2	10.1111/pbi.13020	CRISPR/SpCas9	DNA-stable	≥4	No detailed position of mismatch/es proximal to the PAM																											No	0.35
150	2	10.1111/pbi.13020	CRISPR/SpCas9	DNA-stable	≥4	No detailed position of mismatch/es proximal to the PAM																											No	0.35
150	2	10.1111/pbi.13020	CRISPR/SpCas9	DNA-stable	≥4	No detailed position of mismatch/es proximal to the PAM																											No	0.35
150	2	10.1111/pbi.13020	CRISPR/SpCas9	DNA-stable	≥4	No detailed position of mismatch/es proximal to the PAM																											No	0.35
150	2	10.1111/pbi.13020	CRISPR/SpCas9	DNA-stable	≥4	No detailed position of mismatch/es proximal to the PAM																											No	0.35
150	2	10.1111/pbi.13020	CRISPR/SpCas9	DNA-stable	≥4	No detailed position of mismatch/es proximal to the PAM																											No	0.35
150	2	10.1111/pbi.13020	CRISPR/SpCas9	DNA-stable	≥4	No detailed position of mismatch/es proximal to the PAM																											No	0.35
150	2	10.1111/pbi.13020	CRISPR/SpCas9	DNA-stable	≥4	No detailed position of mismatch/es proximal to the PAM																											No	0.35
150	2	10.1111/pbi.13020	CRISPR/SpCas9	DNA-stable	≥4	No detailed position of mismatch/es proximal to the PAM																											No	0.35
150	2	10.1111/pbi.13020	CRISPR/SpCas9	DNA-stable	≥4	No detailed position of mismatch/es proximal to the PAM																											No	0.35
150	2	10.1111/pbi.13020	CRISPR/SpCas9	DNA-stable	≥4	No detailed position of mismatch/es proximal to the PAM																											No	0.35
150	2	10.1111/pbi.13020	CRISPR/SpCas9	DNA-stable	≥4	No detailed position of mismatch/es proximal to the PAM																											No	0.35
150	2	10.1111/pbi.13020	CRISPR/SpCas9	DNA-stable	≥4	No detailed position of mismatch/es proximal to the PAM																											No	0.35
150	2	10.1111/pbi.13020	CRISPR/SpCas9	DNA-stable	≥4	No detailed position of mismatch/es proximal to the PAM																											No	0.35
150	2	10.1111/pbi.13020	CRISPR/SpCas9	DNA-stable	≥4	No detailed position of mismatch/es proximal to the PAM																											No	0.35
150	2	10.1111/pbi.13020	CRISPR/SpCas9	DNA-stable	≥4	No detailed position of mismatch/es proximal to the PAM																											No	0.35
150	2	10.1111/pbi.13020	CRISPR/SpCas9	DNA-stable	≥4	No detailed position of mismatch/es proximal to the PAM																											No	0.35
150	2	10.1111/pbi.13020	CRISPR/SpCas9	DNA-stable	≥4	No detailed position of mismatch/es proximal to the PAM																											No	0.35
150	2	10.1111/pbi.13020	CRISPR/SpCas9	DNA-stable	≥4	No detailed position of mismatch/es proximal to the PAM																											No	0.35
150	4	10.1111/pbi.13020	CRISPR/SpCas9	DNA-stable	≥4	No detailed position of mismatch/es proximal to the PAM																											No	0.71
150	2	10.1111/pbi.13020	CRISPR/SpCas9	DNA-stable	≥4	No detailed position of mismatch/es proximal to the PAM																											No	0.35
150	2	10.1111/pbi.13020	CRISPR/SpCas9	DNA-stable	≥4	No detailed position of mismatch/es proximal to the PAM																											No	0.35
150	2	10.1111/pbi.13020	CRISPR/SpCas9	DNA-stable	≥4	No detailed position of mismatch/es proximal to the PAM																											No	0.35
150	2	10.1111/pbi.13020	CRISPR/SpCas9	DNA-stable	≥4	No detailed position of mismatch/es proximal to the PAM																											No	0.35
150	2	10.1111/pbi.13020	CRISPR/SpCas9	DNA-stable	≥4	No detailed position of mismatch/es proximal to the PAM																											No	0.35
150	2	10.1111/pbi.13020	CRISPR/SpCas9	DNA-stable	≥4	No detailed position of mismatch/es proximal to the PAM																											No	0.35
150	2	10.1111/pbi.13020	CRISPR/SpCas9	DNA-stable	≥4	No detailed position of mismatch/es proximal to the PAM																											No	0.35
150	2	10.1111/pbi.13020	CRISPR/SpCas9	DNA-stable	≥4	No detailed position of mismatch/es proximal to the PAM																											No	0.35
150	2	10.1111/pbi.13020	CRISPR/SpCas9	DNA-stable	≥4	No detailed position of mismatch/es proximal to the PAM																											No	0.35
150	2	10.1111/pbi.13020	CRISPR/SpCas9	DNA-stable	≥4	No detailed position of mismatch/es proximal to the PAM																											No	0.35
150	2	10.1111/pbi.13020	CRISPR/SpCas9	DNA-stable	≥4	No detailed position of mismatch/es proximal to the PAM																											No	0.35
150	2	10.1111/pbi.13020	CRISPR/SpCas9	DNA-stable	≥4	No detailed position of mismatch/es proximal to the PAM																											No	0.35
150	2	10.1111/pbi.13020	CRISPR/SpCas9	DNA-stable	≥4	No detailed position of mismatch/es proximal to the PAM																											No	0.35
150	2	10.1111/pbi.13020	CRISPR/SpCas9	DNA-stable	≥4	No detailed position of mismatch/es proximal to the PAM																											No	0.35
150	2	10.1111/pbi.13020	CRISPR/SpCas9	DNA-stable	≥4	No detailed position of mismatch/es proximal to the PAM																											No	0.35
150	2	10.1111/pbi.13020	CRISPR/SpCas9	DNA-stable	≥4	No detailed position of mismatch/es proximal to the PAM																											No	0.35
150	2	10.1111/pbi.13020	CRISPR/SpCas9	DNA-stable	≥4	No detailed position of mismatch/es proximal to the PAM																											No	0.35
150	2	10.1111/pbi.13020	CRISPR/SpCas9	DNA-stable	≥4	No detailed position of mismatch/es proximal to the PAM																											No	0.35
150	2	10.1111/pbi.13020	CRISPR/SpCas9	DNA-stable	≥4	No detailed position of mismatch/es proximal to the PAM																											No	0.35
150	2	10.1111/pbi.13020	CRISPR/SpCas9	DNA-stable	≥4	No detailed position of mismatch/es proximal to the PAM																											No	0.35
150	2	10.1111/pbi.13020	CRISPR/SpCas9	DNA-stable	≥4	No detailed position of mismatch/es proximal to the PAM																											No	0.35
150	2	10.1111/pbi.13020	CRISPR/SpCas9	DNA-stable	≥4	No detailed position of mismatch/es proximal to the PAM																											No	0.35
150	4	10.1111/pbi.13020	CRISPR/SpCas9	DNA-stable	≥4	No detailed position of mismatch/es proximal to the PAM																											No	0.71
150	4	10.1111/pbi.13020	CRISPR/SpCas9	DNA-stable	≥4	No detailed position of mismatch/es proximal to the PAM																											No	0.71
150	4	10.1111/pbi.13020	CRISPR/SpCas9	DNA-stable	≥4	No detailed position of mismatch/es proximal to the PAM																											No	0.71
150	2	10.1111/pbi.13020	CRISPR/SpCas9	DNA-stable	≥4	No detailed position of mismatch/es proximal to the PAM																											No	0.35
150	2	10.1111/pbi.13020	CRISPR/SpCas9	DNA-stable	≥4	No detailed position of mismatch/es proximal to the PAM																											No	0.35
150	2	10.1111/pbi.13020	CRISPR/SpCas9	DNA-stable	≥4	No detailed position of mismatch/es proximal to the PAM																											No	0.35
150	2	10.1111/pbi.13020	CRISPR/SpCas9	DNA-stable	≥4	No detailed position of mismatch/es proximal to the PAM																											No	0.35
150	2	10.1111/pbi.13020	CRISPR/SpCas9	DNA-stable	≥4	No detailed position of mismatch/es proximal to the PAM																											No	0.35
150	2	10.1111/pbi.13020	CRISPR/SpCas9	DNA-stable	≥4	No detailed position of mismatch/es proximal to the PAM																											No	0.35
150	4	10.1111/pbi.13020	CRISPR/SpCas9	DNA-stable	≥4	No detailed position of mismatch/es proximal to the PAM																											No	0.71
150	4	10.1111/pbi.13020	CRISPR/SpCas9	DNA-stable	≥4	No detailed position of mismatch/es proximal to the PAM																											No	0.71
150	2	10.1111/pbi.13020	CRISPR/SpCas9	DNA-stable	≥4	No detailed position of mismatch/es proximal to the PAM																											No	0.35
150	2	10.1111/pbi.13020	CRISPR/SpCas9	DNA-stable	≥4	No detailed position of mismatch/es proximal to the PAM																											No	0.35
150	2	10.1111/pbi.13020	CRISPR/SpCas9	DNA-stable	≥4	No detailed position of mismatch/es proximal to the PAM																											No	0.35
150	2	10.1111/pbi.13020	CRISPR/SpCas9	DNA-stable	≥4	No detailed position of mismatch/es proximal to the PAM																											No	0.35
150	2	10.1111/pbi.13020	CRISPR/SpCas9	DNA-stable	≥4	No detailed position of mismatch/es proximal to the PAM																											No	0.35
150	2	10.1111/pbi.13020	CRISPR/SpCas9	DNA-stable	≥4	No detailed position of mismatch/es proximal to the PAM																											No	0.35
150	2	10.1111/pbi.13020	CRISPR/SpCas9	DNA-stable	≥4	No detailed position of mismatch/es proximal to the PAM																											No	0.35
150	2	10.1111/pbi.13020	CRISPR/SpCas9	DNA-stable	≥4	No detailed position of mismatch/es proximal to the PAM																											No	0.35
150	2	10.1111/pbi.13020	CRISPR/SpCas9	DNA-stable	≥4	No detailed position of mismatch/es proximal to the PAM																											No	0.35
150	2	10.1111/pbi.13020	CRISPR/SpCas9	DNA-stable	≥4	No detailed position of mismatch/es proximal to the PAM																											No	0.35
150	2	10.1111/pbi.13020	CRISPR/SpCas9	DNA-stable	≥4	No detailed position of mismatch/es proximal to the PAM																											No	0.35
150	2	10.1111/pbi.13020	CRISPR/SpCas9	DNA-stable	≥4	No detailed position of mismatch/es proximal to the PAM																											No	0.35
150	2	10.1111/pbi.13020	CRISPR/SpCas9	DNA-stable	≥4	No detailed position of mismatch/es proximal to the PAM																											No	0.35
150	2	10.1111/pbi.13020	CRISPR/SpCas9	DNA-stable	≥4	No detailed position of mismatch/es proximal to the PAM																											No	0.35
150	2	10.1111/pbi.13020	CRISPR/SpCas9	DNA-stable	≥4	No detailed position of mismatch/es proximal to the PAM																											No	0.35
150	2	10.1111/pbi.13020	CRISPR/SpCas9	DNA-stable	≥4	No detailed position of mismatch/es proximal to the PAM																											No	0.35
150	2	10.1111/pbi.13020	CRISPR/SpCas9	DNA-stable	≥4	No detailed position of mismatch/es proximal to the PAM																											No	0.35
150	2	10.1111/pbi.13020	CRISPR/SpCas9	DNA-stable	≥4	No detailed position of mismatch/es proximal to the PAM																											No	0.35
150	2	10.1111/pbi.13020	CRISPR/SpCas9	DNA-stable	≥4	No detailed position of mismatch/es proximal to the PAM																											No	0.35
150	2	10.1111/pbi.13020	CRISPR/SpCas9	DNA-stable	≥4	No detailed position of mismatch/es proximal to the PAM																											No	0.35
150	4	10.1111/pbi.13020	CRISPR/SpCas9	DNA-stable	≥4	No detailed position of mismatch/es proximal to the PAM																											No	0.71
150	4	10.1111/pbi.13020	CRISPR/SpCas9	DNA-stable	≥4	No detailed position of mismatch/es proximal to the PAM																											No	0.71
150	2	10.1111/pbi.13020	CRISPR/SpCas9	DNA-stable	≥4	No detailed position of mismatch/es proximal to the PAM																											No	0.35
150	2	10.1111/pbi.13020	CRISPR/SpCas9	DNA-stable	≥4	No detailed position of mismatch/es proximal to the PAM																											No	0.35
150	2	10.1111/pbi.13020	CRISPR/SpCas9	DNA-stable	≥4	No detailed position of mismatch/es proximal to the PAM																											No	0.35
150	2	10.1111/pbi.13020	CRISPR/SpCas9	DNA-stable	≥4	No detailed position of mismatch/es proximal to the PAM																											No	0.35
150	2	10.1111/pbi.13020	CRISPR/SpCas9	DNA-stable	≥4	No detailed position of mismatch/es proximal to the PAM																											No	0.35
150	2	10.1111/pbi.13020	CRISPR/SpCas9	DNA-stable	≥4	No detailed position of mismatch/es proximal to the PAM																											No	0.35
150	2	10.1111/pbi.13020	CRISPR/SpCas9	DNA-stable	≥4	No detailed position of mismatch/es proximal to the PAM																											No	0.35
150	2	10.1111/pbi.13020	CRISPR/SpCas9	DNA-stable	≥4	No detailed position of mismatch/es proximal to the PAM																											No	0.35
150	2	10.1111/pbi.13020	CRISPR/SpCas9	DNA-stable	≥4	No detailed position of mismatch/es proximal to the PAM																											No	0.35
150	2	10.1111/pbi.13020	CRISPR/SpCas9	DNA-stable	≥4	No detailed position of mismatch/es proximal to the PAM																											No	0.35
150	2	10.1111/pbi.13020	CRISPR/SpCas9	DNA-stable	≥4	No detailed position of mismatch/es proximal to the PAM																											No	0.35
150	2	10.1111/pbi.13020	CRISPR/SpCas9	DNA-stable	≥4	No detailed position of mismatch/es proximal to the PAM																											No	0.35
150	2	10.1111/pbi.13020	CRISPR/SpCas9	DNA-stable	≥4	No detailed position of mismatch/es proximal to the PAM																											No	0.35
150	2	10.1111/pbi.13020	CRISPR/SpCas9	DNA-stable	≥4	No detailed position of mismatch/es proximal to the PAM																											No	0.35
150	2	10.1111/pbi.13020	CRISPR/SpCas9	DNA-stable	≥4	No detailed position of mismatch/es proximal to the PAM																											No	0.35
150	2	10.1111/pbi.13020	CRISPR/SpCas9	DNA-stable	≥4	No detailed position of mismatch/es proximal to the PAM																											No	0.35
150	2	10.1111/pbi.13020	CRISPR/SpCas9	DNA-stable	≥4	No detailed position of mismatch/es proximal to the PAM																											No	0.35
150	2	10.1111/pbi.13020	CRISPR/SpCas9	DNA-stable	≥4	No detailed position of mismatch/es proximal to the PAM																											No	0.35
150	2	10.1111/pbi.13020	CRISPR/SpCas9	DNA-stable	≥4	No detailed position of mismatch/es proximal to the PAM																											No	0.35
150	2	10.1111/pbi.13020	CRISPR/SpCas9	DNA-stable	≥4	No detailed position of mismatch/es proximal to the PAM																											No	0.35
150	2	10.1111/pbi.13020	CRISPR/SpCas9	DNA-stable	≥4	No detailed position of mismatch/es proximal to the PAM																											No	0.35
150	2	10.1111/pbi.13020	CRISPR/SpCas9	DNA-stable	≥4	No detailed position of mismatch/es proximal to the PAM																											No	0.35
150	2	10.1111/pbi.13020	CRISPR/SpCas9	DNA-stable	≥4	No detailed position of mismatch/es proximal to the PAM																											No	0.35
150	2	10.1111/pbi.13020	CRISPR/SpCas9	DNA-stable	≥4	No detailed position of mismatch/es proximal to the PAM																											No	0.35
150	2	10.1111/pbi.13020	CRISPR/SpCas9	DNA-stable	≥4	No detailed position of mismatch/es proximal to the PAM																											No	0.35
150	2	10.1111/pbi.13020	CRISPR/SpCas9	DNA-stable	≥4	No detailed position of mismatch/es proximal to the PAM																											No	0.35
150	2	10.1111/pbi.13020	CRISPR/SpCas9	DNA-stable	≥4	No detailed position of mismatch/es proximal to the PAM																											No	0.35
150	2	10.1111/pbi.13020	CRISPR/SpCas9	DNA-stable	≥4	No detailed position of mismatch/es proximal to the PAM																											No	0.35
150	2	10.1111/pbi.13020	CRISPR/SpCas9	DNA-stable	≥4	No detailed position of mismatch/es proximal to the PAM																											No	0.35
150	2	10.1111/pbi.13020	CRISPR/SpCas9	DNA-stable	≥4	No detailed position of mismatch/es proximal to the PAM																											No	0.35
150	2	10.1111/pbi.13020	CRISPR/SpCas9	DNA-stable	≥4	No detailed position of mismatch/es proximal to the PAM																											No	0.35
150	2	10.1111/pbi.13020	CRISPR/SpCas9	DNA-stable	≥4	No detailed position of mismatch/es proximal to the PAM																											No	0.35
150	2	10.1111/pbi.13020	CRISPR/SpCas9	DNA-stable	≥4	No detailed position of mismatch/es proximal to the PAM																											No	0.35
150	4	10.1111/pbi.13020	CRISPR/SpCas9	DNA-stable	≥4	No detailed position of mismatch/es proximal to the PAM																											No	0.71
150	4	10.1111/pbi.13020	CRISPR/SpCas9	DNA-stable	≥4	No detailed position of mismatch/es proximal to the PAM																											No	0.71
150	4	10.1111/pbi.13020	CRISPR/SpCas9	DNA-stable	≥4	No detailed position of mismatch/es proximal to the PAM																											No	0.71
150	4	10.1111/pbi.13020	CRISPR/SpCas9	DNA-stable	≥4	No detailed position of mismatch/es proximal to the PAM																											No	0.71
150	2	10.1111/pbi.13020	CRISPR/SpCas9	DNA-stable	≥4	No detailed position of mismatch/es proximal to the PAM																											No	0.35
150	2	10.1111/pbi.13020	CRISPR/SpCas9	DNA-stable	≥4	No detailed position of mismatch/es proximal to the PAM																											No	0.35
150	2	10.1111/pbi.13020	CRISPR/SpCas9	DNA-stable	≥4	No detailed position of mismatch/es proximal to the PAM																											No	0.35
150	2	10.1111/pbi.13020	CRISPR/SpCas9	DNA-stable	≥4	No detailed position of mismatch/es proximal to the PAM																											No	0.35
150	2	10.1111/pbi.13020	CRISPR/SpCas9	DNA-stable	≥4	No detailed position of mismatch/es proximal to the PAM																											No	0.35
150	2	10.1111/pbi.13020	CRISPR/SpCas9	DNA-stable	≥4	No detailed position of mismatch/es proximal to the PAM																											No	0.35
150	2	10.1111/pbi.13020	CRISPR/SpCas9	DNA-stable	≥4	No detailed position of mismatch/es proximal to the PAM																											No	0.35
150	2	10.1111/pbi.13020	CRISPR/SpCas9	DNA-stable	≥4	No detailed position of mismatch/es proximal to the PAM																											No	0.35
150	2	10.1111/pbi.13020	CRISPR/SpCas9	DNA-stable	≥4	No detailed position of mismatch/es proximal to the PAM																											No	0.35
150	2	10.1111/pbi.13020	CRISPR/SpCas9	DNA-stable	≥4	No detailed position of mismatch/es proximal to the PAM																											No	0.35
150	2	10.1111/pbi.13020	CRISPR/SpCas9	DNA-stable	≥4	No detailed position of mismatch/es proximal to the PAM																											No	0.35
150	2	10.1111/pbi.13020	CRISPR/SpCas9	DNA-stable	≥4	No detailed position of mismatch/es proximal to the PAM																											No	0.35
150	2	10.1111/pbi.13020	CRISPR/SpCas9	DNA-stable	≥4	No detailed position of mismatch/es proximal to the PAM																											No	0.35
150	2	10.1111/pbi.13020	CRISPR/SpCas9	DNA-stable	≥4	No detailed position of mismatch/es proximal to the PAM																											No	0.35
150	2	10.1111/pbi.13020	CRISPR/SpCas9	DNA-stable	≥4	No detailed position of mismatch/es proximal to the PAM																											No	0.35
150	2	10.1111/pbi.13020	CRISPR/SpCas9	DNA-stable	≥4	No detailed position of mismatch/es proximal to the PAM																											No	0.35
150	2	10.1111/pbi.13020	CRISPR/SpCas9	DNA-stable	≥4	No detailed position of mismatch/es proximal to the PAM																											No	0.35
150	2	10.1111/pbi.13020	CRISPR/SpCas9	DNA-stable	≥4	No detailed position of mismatch/es proximal to the PAM																											No	0.35
150	2	10.1111/pbi.13020	CRISPR/SpCas9	DNA-stable	≥4	No detailed position of mismatch/es proximal to the PAM																											No	0.35
150	2	10.1111/pbi.13020	CRISPR/SpCas9	DNA-stable	≥4	No detailed position of mismatch/es proximal to the PAM																											No	0.35
150	2	10.1111/pbi.13020	CRISPR/SpCas9	DNA-stable	≥4	No detailed position of mismatch/es proximal to the PAM																											No	0.35
150	2	10.1111/pbi.13020	CRISPR/SpCas9	DNA-stable	≥4	No detailed position of mismatch/es proximal to the PAM																											No	0.35
150	2	10.1111/pbi.13020	CRISPR/SpCas9	DNA-stable	≥4	No detailed position of mismatch/es proximal to the PAM																											No	0.35
150	2	10.1111/pbi.13020	CRISPR/SpCas9	DNA-stable	≥4	No detailed position of mismatch/es proximal to the PAM																											No	0.35
150	4	10.1111/pbi.13020	CRISPR/SpCas9	DNA-stable	≥4	No detailed position of mismatch/es proximal to the PAM																											No	0.71
150	4	10.1111/pbi.13020	CRISPR/SpCas9	DNA-stable	≥4	No detailed position of mismatch/es proximal to the PAM																											No	0.71
150	4	10.1111/pbi.13020	CRISPR/SpCas9	DNA-stable	≥4	No detailed position of mismatch/es proximal to the PAM																											No	0.71
150	4	10.1111/pbi.13020	CRISPR/SpCas9	DNA-stable	≥4	No detailed position of mismatch/es proximal to the PAM																											No	0.71
150	4	10.1111/pbi.13020	CRISPR/SpCas9	DNA-stable	≥4	No detailed position of mismatch/es proximal to the PAM																											No	0.71
150	4	10.1111/pbi.13020	CRISPR/SpCas9	DNA-stable	≥4	No detailed position of mismatch/es proximal to the PAM																											No	0.71
150	2	10.1111/pbi.13020	CRISPR/SpCas9	DNA-stable	≥4	No detailed position of mismatch/es proximal to the PAM																											No	0.35
150	2	10.1111/pbi.13020	CRISPR/SpCas9	DNA-stable	≥4	No detailed position of mismatch/es proximal to the PAM																											No	0.35
150	2	10.1111/pbi.13020	CRISPR/SpCas9	DNA-stable	≥4	No detailed position of mismatch/es proximal to the PAM																											No	0.35
150	2	10.1111/pbi.13020	CRISPR/SpCas9	DNA-stable	≥4	No detailed position of mismatch/es proximal to the PAM																											No	0.35
150	2	10.1111/pbi.13020	CRISPR/SpCas9	DNA-stable	≥4	No detailed position of mismatch/es proximal to the PAM																											No	0.35
150	2	10.1111/pbi.13020	CRISPR/SpCas9	DNA-stable	≥4	No detailed position of mismatch/es proximal to the PAM																											No	0.35
150	2	10.1111/pbi.13020	CRISPR/SpCas9	DNA-stable	≥4	No detailed position of mismatch/es proximal to the PAM																											No	0.35
150	2	10.1111/pbi.13020	CRISPR/SpCas9	DNA-stable	≥4	No detailed position of mismatch/es proximal to the PAM																											No	0.35
150	2	10.1111/pbi.13020	CRISPR/SpCas9	DNA-stable	≥4	No detailed position of mismatch/es proximal to the PAM																											No	0.35
150	2	10.1111/pbi.13020	CRISPR/SpCas9	DNA-stable	≥4	No detailed position of mismatch/es proximal to the PAM																											No	0.35
150	2	10.1111/pbi.13020	CRISPR/SpCas9	DNA-stable	≥4	No detailed position of mismatch/es proximal to the PAM																											No	0.35
150	2	10.1111/pbi.13020	CRISPR/SpCas9	DNA-stable	≥4	No detailed position of mismatch/es proximal to the PAM																											No	0.35
150	2	10.1111/pbi.13020	CRISPR/SpCas9	DNA-stable	≥4	No detailed position of mismatch/es proximal to the PAM																											No	0.35
150	2	10.1111/pbi.13020	CRISPR/SpCas9	DNA-stable	≥4	No detailed position of mismatch/es proximal to the PAM																											No	0.35
150	2	10.1111/pbi.13020	CRISPR/SpCas9	DNA-stable	≥4	No detailed position of mismatch/es proximal to the PAM																											No	0.35
150	2	10.1111/pbi.13020	CRISPR/SpCas9	DNA-stable	≥4	No detailed position of mismatch/es proximal to the PAM																											No	0.35
150	2	10.1111/pbi.13020	CRISPR/SpCas9	DNA-stable	≥4	No detailed position of mismatch/es proximal to the PAM																											No	0.35
150	2	10.1111/pbi.13020	CRISPR/SpCas9	DNA-stable	≥4	No detailed position of mismatch/es proximal to the PAM																											No	0.35
150	2	10.1111/pbi.13020	CRISPR/SpCas9	DNA-stable	≥4	No detailed position of mismatch/es proximal to the PAM																											No	0.35
150	2	10.1111/pbi.13020	CRISPR/SpCas9	DNA-stable	≥4	No detailed position of mismatch/es proximal to the PAM																											No	0.35
150	2	10.1111/pbi.13020	CRISPR/SpCas9	DNA-stable	≥4	No detailed position of mismatch/es proximal to the PAM																											No	0.35
150	2	10.1111/pbi.13020	CRISPR/SpCas9	DNA-stable	≥4	No detailed position of mismatch/es proximal to the PAM																											No	0.35
150	2	10.1111/pbi.13020	CRISPR/SpCas9	DNA-stable	≥4	No detailed position of mismatch/es proximal to the PAM																											No	0.35
150	2	10.1111/pbi.13020	CRISPR/SpCas9	DNA-stable	≥4	No detailed position of mismatch/es proximal to the PAM																											No	0.35
150	2	10.1111/pbi.13020	CRISPR/SpCas9	DNA-stable	≥4	No detailed position of mismatch/es proximal to the PAM																											No	0.35
150	2	10.1111/pbi.13020	CRISPR/SpCas9	DNA-stable	≥4	No detailed position of mismatch/es proximal to the PAM																											No	0.35
150	2	10.1111/pbi.13020	CRISPR/SpCas9	DNA-stable	≥4	No detailed position of mismatch/es proximal to the PAM																											No	0.35
150	2	10.1111/pbi.13020	CRISPR/SpCas9	DNA-stable	≥4	No detailed position of mismatch/es proximal to the PAM																											No	0.35
150	2	10.1111/pbi.13020	CRISPR/SpCas9	DNA-stable	≥4	No detailed position of mismatch/es proximal to the PAM																											No	0.35
150	2	10.1111/pbi.13020	CRISPR/SpCas9	DNA-stable	≥4	No detailed position of mismatch/es proximal to the PAM																											No	0.35
150	2	10.1111/pbi.13020	CRISPR/SpCas9	DNA-stable	≥4	No detailed position of mismatch/es proximal to the PAM																											No	0.35
150	2	10.1111/pbi.13020	CRISPR/SpCas9	DNA-stable	≥4	No detailed position of mismatch/es proximal to the PAM																											No	0.35
150	2	10.1111/pbi.13020	CRISPR/SpCas9	DNA-stable	≥4	No detailed position of mismatch/es proximal to the PAM																											No	0.35
150	2	10.1111/pbi.13020	CRISPR/SpCas9	DNA-stable	≥4	No detailed position of mismatch/es proximal to the PAM																											No	0.35
150	2	10.1111/pbi.13020	CRISPR/SpCas9	DNA-stable	≥4	No detailed position of mismatch/es proximal to the PAM																											No	0.35
150	2	10.1111/pbi.13020	CRISPR/SpCas9	DNA-stable	≥4	No detailed position of mismatch/es proximal to the PAM																											No	0.35
150	2	10.1111/pbi.13020	CRISPR/SpCas9	DNA-stable	≥4	No detailed position of mismatch/es proximal to the PAM																											No	0.35
150	2	10.1111/pbi.13020	CRISPR/SpCas9	DNA-stable	≥4	No detailed position of mismatch/es proximal to the PAM																											No	0.35
150	2	10.1111/pbi.13020	CRISPR/SpCas9	DNA-stable	≥4	No detailed position of mismatch/es proximal to the PAM																											No	0.35
150	2	10.1111/pbi.13020	CRISPR/SpCas9	DNA-stable	≥4	No detailed position of mismatch/es proximal to the PAM																											No	0.35
150	2	10.1111/pbi.13020	CRISPR/SpCas9	DNA-stable	≥4	No detailed position of mismatch/es proximal to the PAM																											No	0.35
150	2	10.1111/pbi.13020	CRISPR/SpCas9	DNA-stable	≥4	No detailed position of mismatch/es proximal to the PAM																											No	0.35
150	2	10.1111/pbi.13020	CRISPR/SpCas9	DNA-stable	≥4	No detailed position of mismatch/es proximal to the PAM																											No	0.35
150	2	10.1111/pbi.13020	CRISPR/SpCas9	DNA-stable	≥4	No detailed position of mismatch/es proximal to the PAM																											No	0.35
150	2	10.1111/pbi.13020	CRISPR/SpCas9	DNA-stable	≥4	No detailed position of mismatch/es proximal to the PAM																											No	0.35
150	2	10.1111/pbi.13020	CRISPR/SpCas9	DNA-stable	≥4	No detailed position of mismatch/es proximal to the PAM																											No	0.35
150	2	10.1111/pbi.13020	CRISPR/SpCas9	DNA-stable	≥4	No detailed position of mismatch/es proximal to the PAM																											No	0.35
150	2	10.1111/pbi.13020	CRISPR/SpCas9	DNA-stable	≥4	No detailed position of mismatch/es proximal to the PAM																											No	0.35
150	2	10.1111/pbi.13020	CRISPR/SpCas9	DNA-stable	≥4	No detailed position of mismatch/es proximal to the PAM																											No	0.35
150	2	10.1111/pbi.13020	CRISPR/SpCas9	DNA-stable	≥4	No detailed position of mismatch/es proximal to the PAM																											No	0.35
150	2	10.1111/pbi.13020	CRISPR/SpCas9	DNA-stable	≥4	No detailed position of mismatch/es proximal to the PAM																											No	0.35
150	2	10.1111/pbi.13020	CRISPR/SpCas9	DNA-stable	≥4	No detailed position of mismatch/es proximal to the PAM																											No	0.35
150	2	10.1111/pbi.13020	CRISPR/SpCas9	DNA-stable	≥4	No detailed position of mismatch/es proximal to the PAM																											No	0.35
150	2	10.1111/pbi.13020	CRISPR/SpCas9	DNA-stable	≥4	No detailed position of mismatch/es proximal to the PAM																											No	0.35
150	2	10.1111/pbi.13020	CRISPR/SpCas9	DNA-stable	≥4	No detailed position of mismatch/es proximal to the PAM																											No	0.35
150	2	10.1111/pbi.13020	CRISPR/SpCas9	DNA-stable	≥4	No detailed position of mismatch/es proximal to the PAM																											No	0.35
150	2	10.1111/pbi.13020	CRISPR/SpCas9	DNA-stable	≥4	No detailed position of mismatch/es proximal to the PAM																											No	0.35
150	2	10.1111/pbi.13020	CRISPR/SpCas9	DNA-stable	≥4	No detailed position of mismatch/es proximal to the PAM																											No	0.35
150	2	10.1111/pbi.13020	CRISPR/SpCas9	DNA-stable	≥4	No detailed position of mismatch/es proximal to the PAM																											No	0.35
150	2	10.1111/pbi.13020	CRISPR/SpCas9	DNA-stable	≥4	No detailed position of mismatch/es proximal to the PAM																											No	0.35
150	2	10.1111/pbi.13020	CRISPR/SpCas9	DNA-stable	≥4	No detailed position of mismatch/es proximal to the PAM																											No	0.35
150	2	10.1111/pbi.13020	CRISPR/SpCas9	DNA-stable	≥4	No detailed position of mismatch/es proximal to the PAM																											No	0.35
150	2	10.1111/pbi.13020	CRISPR/SpCas9	DNA-stable	≥4	No detailed position of mismatch/es proximal to the PAM																											No	0.35
150	2	10.1111/pbi.13020	CRISPR/SpCas9	DNA-stable	≥4	No detailed position of mismatch/es proximal to the PAM																											No	0.35
150	2	10.1111/pbi.13020	CRISPR/SpCas9	DNA-stable	≥4	No detailed position of mismatch/es proximal to the PAM																											No	0.35
150	2	10.1111/pbi.13020	CRISPR/SpCas9	DNA-stable	≥4	No detailed position of mismatch/es proximal to the PAM																											No	0.35
150	2	10.1111/pbi.13020	CRISPR/SpCas9	DNA-stable	≥4	No detailed position of mismatch/es proximal to the PAM																											No	0.35
150	2	10.1111/pbi.13020	CRISPR/SpCas9	DNA-stable	≥4	No detailed position of mismatch/es proximal to the PAM																											No	0.35
150	2	10.1111/pbi.13020	CRISPR/SpCas9	DNA-stable	≥4	No detailed position of mismatch/es proximal to the PAM																											No	0.35
150	2	10.1111/pbi.13020	CRISPR/SpCas9	DNA-stable	≥4	No detailed position of mismatch/es proximal to the PAM																											No	0.35
150	2	10.1111/pbi.13020	CRISPR/SpCas9	DNA-stable	≥4	No detailed position of mismatch/es proximal to the PAM																											No	0.35
150	2	10.1111/pbi.13020	CRISPR/SpCas9	DNA-stable	≥4	No detailed position of mismatch/es proximal to the PAM																											No	0.35
150	2	10.1111/pbi.13020	CRISPR/SpCas9	DNA-stable	≥4	No detailed position of mismatch/es proximal to the PAM																											No	0.35
150	2	10.1111/pbi.13020	CRISPR/SpCas9	DNA-stable	≥4	No detailed position of mismatch/es proximal to the PAM																											No	0.35
150	2	10.1111/pbi.13020	CRISPR/SpCas9	DNA-stable	≥4	No detailed position of mismatch/es proximal to the PAM																											No	0.35
150	2	10.1111/pbi.13020	CRISPR/SpCas9	DNA-stable	≥4	No detailed position of mismatch/es proximal to the PAM																											No	0.35
150	2	10.1111/pbi.13020	CRISPR/SpCas9	DNA-stable	≥4	No detailed position of mismatch/es proximal to the PAM																											No	0.35
150	2	10.1111/pbi.13020	CRISPR/SpCas9	DNA-stable	≥4	No detailed position of mismatch/es proximal to the PAM																											No	0.35
150	2	10.1111/pbi.13020	CRISPR/SpCas9	DNA-stable	≥4	No detailed position of mismatch/es proximal to the PAM																											No	0.35
150	2	10.1111/pbi.13020	CRISPR/SpCas9	DNA-stable	≥4	No detailed position of mismatch/es proximal to the PAM																											No	0.35
150	2	10.1111/pbi.13020	CRISPR/SpCas9	DNA-stable	≥4	No detailed position of mismatch/es proximal to the PAM																											No	0.35
150	2	10.1111/pbi.13020	CRISPR/SpCas9	DNA-stable	≥4	No detailed position of mismatch/es proximal to the PAM																											No	0.35
150	6	10.1111/pbi.13020	CRISPR/SpCas9	DNA-stable	≥4	No detailed position of mismatch/es proximal to the PAM																											No	0.35
150	6	10.1111/pbi.13020	CRISPR/SpCas9	DNA-stable	≥4	No detailed position of mismatch/es proximal to the PAM																											No	0.35
150	6	10.1111/pbi.13020	CRISPR/SpCas9	DNA-stable	≥4	No detailed position of mismatch/es proximal to the PAM																											No	0.35
150	6	10.1111/pbi.13020	CRISPR/SpCas9	DNA-stable	≥4	No detailed position of mismatch/es proximal to the PAM																											No	0.35
150	6	10.1111/pbi.13020	CRISPR/SpCas9	DNA-stable	≥4	No detailed position of mismatch/es proximal to the PAM																											No	0.35
150	6	10.1111/pbi.13020	CRISPR/SpCas9	DNA-stable	≥4	No detailed position of mismatch/es proximal to the PAM																											No	0.35
150	6	10.1111/pbi.13020	CRISPR/SpCas9	DNA-stable	≥4	No detailed position of mismatch/es proximal to the PAM																											No	0.35
150	6	10.1111/pbi.13020	CRISPR/SpCas9	DNA-stable	≥4	No detailed position of mismatch/es proximal to the PAM																											No	0.35
150	6	10.1111/pbi.13020	CRISPR/SpCas9	DNA-stable	≥4	No detailed position of mismatch/es proximal to the PAM																											No	0.35
150	6	10.1111/pbi.13020	CRISPR/SpCas9	DNA-stable	≥4	No detailed position of mismatch/es proximal to the PAM																											No	0.35
150	6	10.1111/pbi.13020	CRISPR/SpCas9	DNA-stable	≥4	No detailed position of mismatch/es proximal to the PAM																											No	0.35
150	6	10.1111/pbi.13020	CRISPR/SpCas9	DNA-stable	≥4	No detailed position of mismatch/es proximal to the PAM																											No	0.35
150	6	10.1111/pbi.13020	CRISPR/SpCas9	DNA-stable	≥4	No detailed position of mismatch/es proximal to the PAM																											No	0.35
150	6	10.1111/pbi.13020	CRISPR/SpCas9	DNA-stable	≥4	No detailed position of mismatch/es proximal to the PAM																											No	0.35
150	6	10.1111/pbi.13020	CRISPR/SpCas9	DNA-stable	≥4	No detailed position of mismatch/es proximal to the PAM																											No	0.35
150	6	10.1111/pbi.13020	CRISPR/SpCas9	DNA-stable	≥4	No detailed position of mismatch/es proximal to the PAM																											No	0.35
150	6	10.1111/pbi.13020	CRISPR/SpCas9	DNA-stable	≥4	No detailed position of mismatch/es proximal to the PAM																											No	0.35
150	6	10.1111/pbi.13020	CRISPR/SpCas9	DNA-stable	≥4	No detailed position of mismatch/es proximal to the PAM																											No	0.35
150	6	10.1111/pbi.13020	CRISPR/SpCas9	DNA-stable	≥4	No detailed position of mismatch/es proximal to the PAM																											No	0.35
150	6	10.1111/pbi.13020	CRISPR/SpCas9	DNA-stable	≥4	No detailed position of mismatch/es proximal to the PAM																											No	0.35
150	6	10.1111/pbi.13020	CRISPR/SpCas9	DNA-stable	≥4	No detailed position of mismatch/es proximal to the PAM																											No	0.35
150	6	10.1111/pbi.13020	CRISPR/SpCas9	DNA-stable	≥4	No detailed position of mismatch/es proximal to the PAM																											No	0.35
150	6	10.1111/pbi.13020	CRISPR/SpCas9	DNA-stable	≥4	No detailed position of mismatch/es proximal to the PAM																											No	0.35
150	6	10.1111/pbi.13020	CRISPR/SpCas9	DNA-stable	≥4	No detailed position of mismatch/es proximal to the PAM																											No	0.35
150	6	10.1111/pbi.13020	CRISPR/SpCas9	DNA-stable	≥4	No detailed position of mismatch/es proximal to the PAM																											No	0.35
150	6	10.1111/pbi.13020	CRISPR/SpCas9	DNA-stable	≥4	No detailed position of mismatch/es proximal to the PAM																											No	0.35
150	6	10.1111/pbi.13020	CRISPR/SpCas9	DNA-stable	≥4	No detailed position of mismatch/es proximal to the PAM																											No	0.35
150	6	10.1111/pbi.13020	CRISPR/SpCas9	DNA-stable	≥4	No detailed position of mismatch/es proximal to the PAM																											No	0.35
150	6	10.1111/pbi.13020	CRISPR/SpCas9	DNA-stable	≥4	No detailed position of mismatch/es proximal to the PAM																											No	0.35
150	6	10.1111/pbi.13020	CRISPR/SpCas9	DNA-stable	≥4	No detailed position of mismatch/es proximal to the PAM																											No	0.35
150	6	10.1111/pbi.13020	CRISPR/SpCas9	DNA-stable	≥4	No detailed position of mismatch/es proximal to the PAM																											No	0.35
150	6	10.1111/pbi.13020	CRISPR/SpCas9	DNA-stable	≥4	No detailed position of mismatch/es proximal to the PAM																											No	0.35
150	6	10.1111/pbi.13020	CRISPR/SpCas9	DNA-stable	≥4	No detailed position of mismatch/es proximal to the PAM																											No	0.35
150	6	10.1111/pbi.13020	CRISPR/SpCas9	DNA-stable	≥4	No detailed position of mismatch/es proximal to the PAM																											No	0.35
150	6	10.1111/pbi.13020	CRISPR/SpCas9	DNA-stable	≥4	No detailed position of mismatch/es proximal to the PAM																											No	0.35
150	6	10.1111/pbi.13020	CRISPR/SpCas9	DNA-stable	≥4	No detailed position of mismatch/es proximal to the PAM																											No	0.35
150	6	10.1111/pbi.13020	CRISPR/SpCas9	DNA-stable	≥4	No detailed position of mismatch/es proximal to the PAM																											No	0.35
150	6	10.1111/pbi.13020	CRISPR/SpCas9	DNA-stable	≥4	No detailed position of mismatch/es proximal to the PAM																											No	0.35
150	6	10.1111/pbi.13020	CRISPR/SpCas9	DNA-stable	≥4	No detailed position of mismatch/es proximal to the PAM																											No	0.35
150	6	10.1111/pbi.13020	CRISPR/SpCas9	DNA-stable	≥4	No detailed position of mismatch/es proximal to the PAM																											No	0.35
150	6	10.1111/pbi.13020	CRISPR/SpCas9	DNA-stable	≥4	No detailed position of mismatch/es proximal to the PAM																											No	0.35
150	6	10.1111/pbi.13020	CRISPR/SpCas9	DNA-stable	≥4	No detailed position of mismatch/es proximal to the PAM																											No	0.35
150	6	10.1111/pbi.13020	CRISPR/SpCas9	DNA-stable	≥4	No detailed position of mismatch/es proximal to the PAM																											No	0.35
150	6	10.1111/pbi.13020	CRISPR/SpCas9	DNA-stable	≥4	No detailed position of mismatch/es proximal to the PAM																											No	0.35
150	6	10.1111/pbi.13020	CRISPR/SpCas9	DNA-stable	≥4	No detailed position of mismatch/es proximal to the PAM																											No	0.35
150	6	10.1111/pbi.13020	CRISPR/SpCas9	DNA-stable	≥4	No detailed position of mismatch/es proximal to the PAM																											No	0.35
150	6	10.1111/pbi.13020	CRISPR/SpCas9	DNA-stable	≥4	No detailed position of mismatch/es proximal to the PAM																											No	0.35
150	6	10.1111/pbi.13020	CRISPR/SpCas9	DNA-stable	≥4	No detailed position of mismatch/es proximal to the PAM																											No	0.35
150	6	10.1111/pbi.13020	CRISPR/SpCas9	DNA-stable	≥4	No detailed position of mismatch/es proximal to the PAM																											No	0.35
150	6	10.1111/pbi.13020	CRISPR/SpCas9	DNA-stable	≥4	No detailed position of mismatch/es proximal to the PAM																											No	0.35
150	6	10.1111/pbi.13020	CRISPR/SpCas9	DNA-stable	≥4	No detailed position of mismatch/es proximal to the PAM																											No	0.35
150	6	10.1111/pbi.13020	CRISPR/SpCas9	DNA-stable	≥4	No detailed position of mismatch/es proximal to the PAM																											No	0.35
150	6	10.1111/pbi.13020	CRISPR/SpCas9	DNA-stable	≥4	No detailed position of mismatch/es proximal to the PAM																											No	0.35
150	6	10.1111/pbi.13020	CRISPR/SpCas9	DNA-stable	≥4	No detailed position of mismatch/es proximal to the PAM																											No	0.35
150	6	10.1111/pbi.13020	CRISPR/SpCas9	DNA-stable	≥4	No detailed position of mismatch/es proximal to the PAM																											No	0.35
150	6	10.1111/pbi.13020	CRISPR/SpCas9	DNA-stable	≥4	No detailed position of mismatch/es proximal to the PAM																											No	0.35
150	6	10.1111/pbi.13020	CRISPR/SpCas9	DNA-stable	≥4	No detailed position of mismatch/es proximal to the PAM																											No	0.35
150	6	10.1111/pbi.13020	CRISPR/SpCas9	DNA-stable	≥4	No detailed position of mismatch/es proximal to the PAM																											No	0.35
150	6	10.1111/pbi.13020	CRISPR/SpCas9	DNA-stable	≥4	No detailed position of mismatch/es proximal to the PAM																											No	0.35
150	6	10.1111/pbi.13020	CRISPR/SpCas9	DNA-stable	≥4	No detailed position of mismatch/es proximal to the PAM																											No	0.35
150	6	10.1111/pbi.13020	CRISPR/SpCas9	DNA-stable	≥4	No detailed position of mismatch/es proximal to the PAM																											No	0.35
150	6	10.1111/pbi.13020	CRISPR/SpCas9	DNA-stable	≥4	No detailed position of mismatch/es proximal to the PAM																											No	0.35
150	6	10.1111/pbi.13020	CRISPR/SpCas9	DNA-stable	≥4	No detailed position of mismatch/es proximal to the PAM																											No	0.35
150	6	10.1111/pbi.13020	CRISPR/SpCas9	DNA-stable	≥4	No detailed position of mismatch/es proximal to the PAM																											No	0.35
150	6	10.1111/pbi.13020	CRISPR/SpCas9	DNA-stable	≥4	No detailed position of mismatch/es proximal to the PAM																											No	0.35
150	6	10.1111/pbi.13020	CRISPR/SpCas9	DNA-stable	≥4	No detailed position of mismatch/es proximal to the PAM																											No	0.35
150	6	10.1111/pbi.13020	CRISPR/SpCas9	DNA-stable	≥4	No detailed position of mismatch/es proximal to the PAM																											No	0.35
150	6	10.1111/pbi.13020	CRISPR/SpCas9	DNA-stable	≥4	No detailed position of mismatch/es proximal to the PAM																											No	0.35
150	6	10.1111/pbi.13020	CRISPR/SpCas9	DNA-stable	≥4	No detailed position of mismatch/es proximal to the PAM																											No	0.35
150	6	10.1111/pbi.13020	CRISPR/SpCas9	DNA-stable	≥4	No detailed position of mismatch/es proximal to the PAM																											No	0.35
150	6	10.1111/pbi.13020	CRISPR/SpCas9	DNA-stable	≥4	No detailed position of mismatch/es proximal to the PAM																											No	0.35
150	6	10.1111/pbi.13020	CRISPR/SpCas9	DNA-stable	≥4	No detailed position of mismatch/es proximal to the PAM																											No	0.35
150	6	10.1111/pbi.13020	CRISPR/SpCas9	DNA-stable	≥4	No detailed position of mismatch/es proximal to the PAM																											No	0.35
150	6	10.1111/pbi.13020	CRISPR/SpCas9	DNA-stable	≥4	No detailed position of mismatch/es proximal to the PAM																											No	0.35
150	6	10.1111/pbi.13020	CRISPR/SpCas9	DNA-stable	≥4	No detailed position of mismatch/es proximal to the PAM																											No	0.35
150	6	10.1111/pbi.13020	CRISPR/SpCas9	DNA-stable	≥4	No detailed position of mismatch/es proximal to the PAM																											No	0.35
150	6	10.1111/pbi.13020	CRISPR/SpCas9	DNA-stable	≥4	No detailed position of mismatch/es proximal to the PAM																											No	0.35
150	6	10.1111/pbi.13020	CRISPR/SpCas9	DNA-stable	≥4	No detailed position of mismatch/es proximal to the PAM																											No	0.35
150	6	10.1111/pbi.13020	CRISPR/SpCas9	DNA-stable	≥4	No detailed position of mismatch/es proximal to the PAM																											No	0.35
150	6	10.1111/pbi.13020	CRISPR/SpCas9	DNA-stable	≥4	No detailed position of mismatch/es proximal to the PAM																											No	0.35
150	6	10.1111/pbi.13020	CRISPR/SpCas9	DNA-stable	≥4	No detailed position of mismatch/es proximal to the PAM																											No	0.35
150	6	10.1111/pbi.13020	CRISPR/SpCas9	DNA-stable	≥4	No detailed position of mismatch/es proximal to the PAM																											No	0.35
150	6	10.1111/pbi.13020	CRISPR/SpCas9	DNA-stable	≥4	No detailed position of mismatch/es proximal to the PAM																											No	0.35
150	6	10.1111/pbi.13020	CRISPR/SpCas9	DNA-stable	≥4	No detailed position of mismatch/es proximal to the PAM																											No	0.35
150	6	10.1111/pbi.13020	CRISPR/SpCas9	DNA-stable	≥4	No detailed position of mismatch/es proximal to the PAM																											No	0.35
150	6	10.1111/pbi.13020	CRISPR/SpCas9	DNA-stable	≥4	No detailed position of mismatch/es proximal to the PAM																											No	0.35
150	6	10.1111/pbi.13020	CRISPR/SpCas9	DNA-stable	≥4	No detailed position of mismatch/es proximal to the PAM																											No	0.35
150	6	10.1111/pbi.13020	CRISPR/SpCas9	DNA-stable	≥4	No detailed position of mismatch/es proximal to the PAM																											No	0.35
150	6	10.1111/pbi.13020	CRISPR/SpCas9	DNA-stable	≥4	No detailed position of mismatch/es proximal to the PAM																											No	0.35
150	6	10.1111/pbi.13020	CRISPR/SpCas9	DNA-stable	≥4	No detailed position of mismatch/es proximal to the PAM																											No	0.35
150	6	10.1111/pbi.13020	CRISPR/SpCas9	DNA-stable	≥4	No detailed position of mismatch/es proximal to the PAM																											No	0.35
150	6	10.1111/pbi.13020	CRISPR/SpCas9	DNA-stable	≥4	No detailed position of mismatch/es proximal to the PAM																											No	0.35
150	6	10.1111/pbi.13020	CRISPR/SpCas9	DNA-stable	≥4	No detailed position of mismatch/es proximal to the PAM																											No	0.35
150	6	10.1111/pbi.13020	CRISPR/SpCas9	DNA-stable	≥4	No detailed position of mismatch/es proximal to the PAM																											No	0.35
150	6	10.1111/pbi.13020	CRISPR/SpCas9	DNA-stable	≥4	No detailed position of mismatch/es proximal to the PAM																											No	0.35
150	6	10.1111/pbi.13020	CRISPR/SpCas9	DNA-stable	≥4	No detailed position of mismatch/es proximal to the PAM																											No	0.35
150	6	10.1111/pbi.13020	CRISPR/SpCas9	DNA-stable	≥4	No detailed position of mismatch/es proximal to the PAM																											No	0.35
150	6	10.1111/pbi.13020	CRISPR/SpCas9	DNA-stable	≥4	No detailed position of mismatch/es proximal to the PAM																											No	0.35
150	6	10.1111/pbi.13020	CRISPR/SpCas9	DNA-stable	≥4	No detailed position of mismatch/es proximal to the PAM																											No	0.35
150	6	10.1111/pbi.13020	CRISPR/SpCas9	DNA-stable	≥4	No detailed position of mismatch/es proximal to the PAM																											No	0.35
150	6	10.1111/pbi.13020	CRISPR/SpCas9	DNA-stable	≥4	No detailed position of mismatch/es proximal to the PAM																											No	0.35
150	6	10.1111/pbi.13020	CRISPR/SpCas9	DNA-stable	≥4	No detailed position of mismatch/es proximal to the PAM																											No	0.35
150	6	10.1111/pbi.13020	CRISPR/SpCas9	DNA-stable	≥4	No detailed position of mismatch/es proximal to the PAM																											No	0.35
150	6	10.1111/pbi.13020	CRISPR/SpCas9	DNA-stable	≥4	No detailed position of mismatch/es proximal to the PAM																											No	0.35
150	6	10.1111/pbi.13020	CRISPR/SpCas9	DNA-stable	≥4	No detailed position of mismatch/es proximal to the PAM																											No	0.35
150	6	10.1111/pbi.13020	CRISPR/SpCas9	DNA-stable	≥4	No detailed position of mismatch/es proximal to the PAM																											No	0.35
150	6	10.1111/pbi.13020	CRISPR/SpCas9	DNA-stable	≥4	No detailed position of mismatch/es proximal to the PAM																											No	0.35
150	6	10.1111/pbi.13020	CRISPR/SpCas9	DNA-stable	≥4	No detailed position of mismatch/es proximal to the PAM																											No	0.35
150	6	10.1111/pbi.13020	CRISPR/SpCas9	DNA-stable	≥4	No detailed position of mismatch/es proximal to the PAM																											No	0.35
150	6	10.1111/pbi.13020	CRISPR/SpCas9	DNA-stable	≥4	No detailed position of mismatch/es proximal to the PAM																											No	0.35
150	6	10.1111/pbi.13020	CRISPR/SpCas9	DNA-stable	≥4	No detailed position of mismatch/es proximal to the PAM																											No	0.35
150	6	10.1111/pbi.13020	CRISPR/SpCas9	DNA-stable	≥4	No detailed position of mismatch/es proximal to the PAM																											No	0.35
150	6	10.1111/pbi.13020	CRISPR/SpCas9	DNA-stable	≥4	No detailed position of mismatch/es proximal to the PAM																											No	0.35
150	6	10.1111/pbi.13020	CRISPR/SpCas9	DNA-stable	≥4	No detailed position of mismatch/es proximal to the PAM																											No	0.35
150	6	10.1111/pbi.13020	CRISPR/SpCas9	DNA-stable	≥4	No detailed position of mismatch/es proximal to the PAM																											No	0.35
150	6	10.1111/pbi.13020	CRISPR/SpCas9	DNA-stable	≥4	No detailed position of mismatch/es proximal to the PAM																											No	0.35
150	6	10.1111/pbi.13020	CRISPR/SpCas9	DNA-stable	≥4	No detailed position of mismatch/es proximal to the PAM																											No	0.35
150	6	10.1111/pbi.13020	CRISPR/SpCas9	DNA-stable	≥4	No detailed position of mismatch/es proximal to the PAM																											No	0.35
150	6	10.1111/pbi.13020	CRISPR/SpCas9	DNA-stable	≥4	No detailed position of mismatch/es proximal to the PAM																											No	0.35
150	6	10.1111/pbi.13020	CRISPR/SpCas9	DNA-stable	≥4	No detailed position of mismatch/es proximal to the PAM																											No	0.35
150	6	10.1111/pbi.13020	CRISPR/SpCas9	DNA-stable	≥4	No detailed position of mismatch/es proximal to the PAM																											No	0.35
150	6	10.1111/pbi.13020	CRISPR/SpCas9	DNA-stable	≥4	No detailed position of mismatch/es proximal to the PAM																											No	0.35
150	6	10.1111/pbi.13020	CRISPR/SpCas9	DNA-stable	≥4	No detailed position of mismatch/es proximal to the PAM																											No	0.35
150	6	10.1111/pbi.13020	CRISPR/SpCas9	DNA-stable	≥4	No detailed position of mismatch/es proximal to the PAM																											No	0.35
150	6	10.1111/pbi.13020	CRISPR/SpCas9	DNA-stable	≥4	No detailed position of mismatch/es proximal to the PAM																											No	0.35
150	6	10.1111/pbi.13020	CRISPR/SpCas9	DNA-stable	≥4	No detailed position of mismatch/es proximal to the PAM																											No	0.35
150	6	10.1111/pbi.13020	CRISPR/SpCas9	DNA-stable	≥4	No detailed position of mismatch/es proximal to the PAM																											No	0.35
150	6	10.1111/pbi.13020	CRISPR/SpCas9	DNA-stable	≥4	No detailed position of mismatch/es proximal to the PAM																											No	0.35
150	6	10.1111/pbi.13020	CRISPR/SpCas9	DNA-stable	≥4	No detailed position of mismatch/es proximal to the PAM																											No	0.35
150	6	10.1111/pbi.13020	CRISPR/SpCas9	DNA-stable	≥4	No detailed position of mismatch/es proximal to the PAM																											No	0.35
150	6	10.1111/pbi.13020	CRISPR/SpCas9	DNA-stable	≥4	No detailed position of mismatch/es proximal to the PAM																											No	0.35
150	6	10.1111/pbi.13020	CRISPR/SpCas9	DNA-stable	≥4	No detailed position of mismatch/es proximal to the PAM																											No	0.35
150	6	10.1111/pbi.13020	CRISPR/SpCas9	DNA-stable	≥4	No detailed position of mismatch/es proximal to the PAM																											No	0.35
150	6	10.1111/pbi.13020	CRISPR/SpCas9	DNA-stable	≥4	No detailed position of mismatch/es proximal to the PAM																											No	0.35
150	6	10.1111/pbi.13020	CRISPR/SpCas9	DNA-stable	≥4	No detailed position of mismatch/es proximal to the PAM																											No	0.35
150	6	10.1111/pbi.13020	CRISPR/SpCas9	DNA-stable	≥4	No detailed position of mismatch/es proximal to the PAM																											No	0.35
150	6	10.1111/pbi.13020	CRISPR/SpCas9	DNA-stable	≥4	No detailed position of mismatch/es proximal to the PAM																											No	0.35
150	6	10.1111/pbi.13020	CRISPR/SpCas9	DNA-stable	≥4	No detailed position of mismatch/es proximal to the PAM																											No	0.35
150	6	10.1111/pbi.13020	CRISPR/SpCas9	DNA-stable	≥4	No detailed position of mismatch/es proximal to the PAM																											No	0.35
150	6	10.1111/pbi.13020	CRISPR/SpCas9	DNA-stable	≥4	No detailed position of mismatch/es proximal to the PAM																											No	0.35
150	6	10.1111/pbi.13020	CRISPR/SpCas9	DNA-stable	≥4	No detailed position of mismatch/es proximal to the PAM																											No	0.35
150	6	10.1111/pbi.13020	CRISPR/SpCas9	DNA-stable	≥4	No detailed position of mismatch/es proximal to the PAM																											No	0.35
150	6	10.1111/pbi.13020	CRISPR/SpCas9	DNA-stable	≥4	No detailed position of mismatch/es proximal to the PAM																											No	0.35
150	6	10.1111/pbi.13020	CRISPR/SpCas9	DNA-stable	≥4	No detailed position of mismatch/es proximal to the PAM																											No	0.35
150	6	10.1111/pbi.13020	CRISPR/SpCas9	DNA-stable	≥4	No detailed position of mismatch/es proximal to the PAM																											No	0.35
150	6	10.1111/pbi.13020	CRISPR/SpCas9	DNA-stable	≥4	No detailed position of mismatch/es proximal to the PAM																											No	0.35
150	6	10.1111/pbi.13020	CRISPR/SpCas9	DNA-stable	≥4	No detailed position of mismatch/es proximal to the PAM																											No	0.35
150	6	10.1111/pbi.13020	CRISPR/SpCas9	DNA-stable	≥4	No detailed position of mismatch/es proximal to the PAM																											No	0.35
150	6	10.1111/pbi.13020	CRISPR/SpCas9	DNA-stable	≥4	No detailed position of mismatch/es proximal to the PAM																											No	0.35
150	6	10.1111/pbi.13020	CRISPR/SpCas9	DNA-stable	≥4	No detailed position of mismatch/es proximal to the PAM																											No	0.35
150	6	10.1111/pbi.13020	CRISPR/SpCas9	DNA-stable	≥4	No detailed position of mismatch/es proximal to the PAM																											No	0.35
150	6	10.1111/pbi.13020	CRISPR/SpCas9	DNA-stable	≥4	No detailed position of mismatch/es proximal to the PAM																											No	0.35
150	6	10.1111/pbi.13020	CRISPR/SpCas9	DNA-stable	≥4	No detailed position of mismatch/es proximal to the PAM																											No	0.35
150	6	10.1111/pbi.13020	CRISPR/SpCas9	DNA-stable	≥4	No detailed position of mismatch/es proximal to the PAM																											No	0.35
150	6	10.1111/pbi.13020	CRISPR/SpCas9	DNA-stable	≥4	No detailed position of mismatch/es proximal to the PAM																											No	0.35
150	6	10.1111/pbi.13020	CRISPR/SpCas9	DNA-stable	≥4	No detailed position of mismatch/es proximal to the PAM																											No	0.35
150	6	10.1111/pbi.13020	CRISPR/SpCas9	DNA-stable	≥4	No detailed position of mismatch/es proximal to the PAM																											No	0.35
150	6	10.1111/pbi.13020	CRISPR/SpCas9	DNA-stable	≥4	No detailed position of mismatch/es proximal to the PAM																											No	0.35
150	6	10.1111/pbi.13020	CRISPR/SpCas9	DNA-stable	≥4	No detailed position of mismatch/es proximal to the PAM																											No	0.35
150	6	10.1111/pbi.13020	CRISPR/SpCas9	DNA-stable	≥4	No detailed position of mismatch/es proximal to the PAM																											No	0.35
150	6	10.1111/pbi.13020	CRISPR/SpCas9	DNA-stable	≥4	No detailed position of mismatch/es proximal to the PAM																											No	0.35
150	6	10.1111/pbi.13020	CRISPR/SpCas9	DNA-stable	≥4	No detailed position of mismatch/es proximal to the PAM																											No	0.35
150	6	10.1111/pbi.13020	CRISPR/SpCas9	DNA-stable	≥4	No detailed position of mismatch/es proximal to the PAM																											No	0.35
150	6	10.1111/pbi.13020	CRISPR/SpCas9	DNA-stable	≥4	No detailed position of mismatch/es proximal to the PAM																											No	0.35
150	6	10.1111/pbi.13020	CRISPR/SpCas9	DNA-stable	≥4	No detailed position of mismatch/es proximal to the PAM																											No	0.35
150	6	10.1111/pbi.13020	CRISPR/SpCas9	DNA-stable	≥4	No detailed position of mismatch/es proximal to the PAM																											No	0.35
150	6	10.1111/pbi.13020	CRISPR/SpCas9	DNA-stable	≥4	No detailed position of mismatch/es proximal to the PAM																											No	0.35
150	6	10.1111/pbi.13020	CRISPR/SpCas9	DNA-stable	≥4	No detailed position of mismatch/es proximal to the PAM																											No	0.35
150	6	10.1111/pbi.13020	CRISPR/SpCas9	DNA-stable	≥4	No detailed position of mismatch/es proximal to the PAM																											No	0.35
150	6	10.1111/pbi.13020	CRISPR/SpCas9	DNA-stable	≥4	No detailed position of mismatch/es proximal to the PAM																											No	0.35
150	6	10.1111/pbi.13020	CRISPR/SpCas9	DNA-stable	≥4	No detailed position of mismatch/es proximal to the PAM																											No	0.35
150	6	10.1111/pbi.13020	CRISPR/SpCas9	DNA-stable	≥4	No detailed position of mismatch/es proximal to the PAM																											No	0.35
150	6	10.1111/pbi.13020	CRISPR/SpCas9	DNA-stable	≥4	No detailed position of mismatch/es proximal to the PAM																											No	0.35
150	6	10.1111/pbi.13020	CRISPR/SpCas9	DNA-stable	≥4	No detailed position of mismatch/es proximal to the PAM																											No	0.35
150	6	10.1111/pbi.13020	CRISPR/SpCas9	DNA-stable	≥4	No detailed position of mismatch/es proximal to the PAM																											No	0.35
150	6	10.1111/pbi.13020	CRISPR/SpCas9	DNA-stable	≥4	No detailed position of mismatch/es proximal to the PAM																											No	0.35
150	6	10.1111/pbi.13020	CRISPR/SpCas9	DNA-stable	≥4	No detailed position of mismatch/es proximal to the PAM																											No	0.35
150	6	10.1111/pbi.13020	CRISPR/SpCas9	DNA-stable	≥4	No detailed position of mismatch/es proximal to the PAM																											No	0.35
150	6	10.1111/pbi.13020	CRISPR/SpCas9	DNA-stable	≥4	No detailed position of mismatch/es proximal to the PAM																											No	0.35
150	6	10.1111/pbi.13020	CRISPR/SpCas9	DNA-stable	≥4	No detailed position of mismatch/es proximal to the PAM																											No	0.35
150	6	10.1111/pbi.13020	CRISPR/SpCas9	DNA-stable	≥4	No detailed position of mismatch/es proximal to the PAM																											No	0.35
150	6	10.1111/pbi.13020	CRISPR/SpCas9	DNA-stable	≥4	No detailed position of mismatch/es proximal to the PAM																											No	0.35
150	6	10.1111/pbi.13020	CRISPR/SpCas9	DNA-stable	≥4	No detailed position of mismatch/es proximal to the PAM																											No	0.35
150	6	10.1111/pbi.13020	CRISPR/SpCas9	DNA-stable	≥4	No detailed position of mismatch/es proximal to the PAM																											No	0.35
150	6	10.1111/pbi.13020	CRISPR/SpCas9	DNA-stable	≥4	No detailed position of mismatch/es proximal to the PAM																											No	0.35
150	6	10.1111/pbi.13020	CRISPR/SpCas9	DNA-stable	≥4	No detailed position of mismatch/es proximal to the PAM																											No	0.35
150	6	10.1111/pbi.13020	CRISPR/SpCas9	DNA-stable	≥4	No detailed position of mismatch/es proximal to the PAM																											No	0.35
150	6	10.1111/pbi.13020	CRISPR/SpCas9	DNA-stable	≥4	No detailed position of mismatch/es proximal to the PAM																											No	0.35
150	6	10.1111/pbi.13020	CRISPR/SpCas9	DNA-stable	≥4	No detailed position of mismatch/es proximal to the PAM																											No	0.35
150	6	10.1111/pbi.13020	CRISPR/SpCas9	DNA-stable	≥4	No detailed position of mismatch/es proximal to the PAM																											No	0.35
150	6	10.1111/pbi.13020	CRISPR/SpCas9	DNA-stable	≥4	No detailed position of mismatch/es proximal to the PAM																											No	0.35
150	6	10.1111/pbi.13020	CRISPR/SpCas9	DNA-stable	≥4	No detailed position of mismatch/es proximal to the PAM																											No	0.35
150	6	10.1111/pbi.13020	CRISPR/SpCas9	DNA-stable	≥4	No detailed position of mismatch/es proximal to the PAM																											No	0.35
150	6	10.1111/pbi.13020	CRISPR/SpCas9	DNA-stable	≥4	No detailed position of mismatch/es proximal to the PAM																											No	0.35
150	6	10.1111/pbi.13020	CRISPR/SpCas9	DNA-stable	≥4	No detailed position of mismatch/es proximal to the PAM																											No	0.35
150	6	10.1111/pbi.13020	CRISPR/SpCas9	DNA-stable	≥4	No detailed position of mismatch/es proximal to the PAM																											No	0.35
150	6	10.1111/pbi.13020	CRISPR/SpCas9	DNA-stable	≥4	No detailed position of mismatch/es proximal to the PAM																											No	0.35
150	6	10.1111/pbi.13020	CRISPR/SpCas9	DNA-stable	≥4	No detailed position of mismatch/es proximal to the PAM																											No	0.35
150	6	10.1111/pbi.13020	CRISPR/SpCas9	DNA-stable	≥4	No detailed position of mismatch/es proximal to the PAM																											No	0.35
150	6	10.1111/pbi.13020	CRISPR/SpCas9	DNA-stable	≥4	No detailed position of mismatch/es proximal to the PAM																											No	0.35
150	6	10.1111/pbi.13020	CRISPR/SpCas9	DNA-stable	≥4	No detailed position of mismatch/es proximal to the PAM																											No	0.35
150	6	10.1111/pbi.13020	CRISPR/SpCas9	DNA-stable	≥4	No detailed position of mismatch/es proximal to the PAM																											No	0.35
150	6	10.1111/pbi.13020	CRISPR/SpCas9	DNA-stable	≥4	No detailed position of mismatch/es proximal to the PAM																											No	0.35
150	6	10.1111/pbi.13020	CRISPR/SpCas9	DNA-stable	≥4	No detailed position of mismatch/es proximal to the PAM																											No	0.35
150	6	10.1111/pbi.13020	CRISPR/SpCas9	DNA-stable	≥4	No detailed position of mismatch/es proximal to the PAM																											No	0.35
150	6	10.1111/pbi.13020	CRISPR/SpCas9	DNA-stable	≥4	No detailed position of mismatch/es proximal to the PAM																											No	0.35
150	6	10.1111/pbi.13020	CRISPR/SpCas9	DNA-stable	≥4	No detailed position of mismatch/es proximal to the PAM																											No	0.35
150	6	10.1111/pbi.13020	CRISPR/SpCas9	DNA-stable	≥4	No detailed position of mismatch/es proximal to the PAM																											No	0.35
150	6	10.1111/pbi.13020	CRISPR/SpCas9	DNA-stable	≥4	No detailed position of mismatch/es proximal to the PAM																											No	0.35
150	6	10.1111/pbi.13020	CRISPR/SpCas9	DNA-stable	≥4	No detailed position of mismatch/es proximal to the PAM																											No	0.35
150	6	10.1111/pbi.13020	CRISPR/SpCas9	DNA-stable	≥4	No detailed position of mismatch/es proximal to the PAM																											No	0.35
150	6	10.1111/pbi.13020	CRISPR/SpCas9	DNA-stable	≥4	No detailed position of mismatch/es proximal to the PAM																											No	0.35
150	6	10.1111/pbi.13020	CRISPR/SpCas9	DNA-stable	≥4	No detailed position of mismatch/es proximal to the PAM																											No	0.35
150	6	10.1111/pbi.13020	CRISPR/SpCas9	DNA-stable	≥4	No detailed position of mismatch/es proximal to the PAM																											No	0.35
150	6	10.1111/pbi.13020	CRISPR/SpCas9	DNA-stable	≥4	No detailed position of mismatch/es proximal to the PAM																											No	0.35
150	6	10.1111/pbi.13020	CRISPR/SpCas9	DNA-stable	≥4	No detailed position of mismatch/es proximal to the PAM																											No	0.35
150	6	10.1111/pbi.13020	CRISPR/SpCas9	DNA-stable	≥4	No detailed position of mismatch/es proximal to the PAM																											No	0.35
150	6	10.1111/pbi.13020	CRISPR/SpCas9	DNA-stable	≥4	No detailed position of mismatch/es proximal to the PAM																											No	0.35
150	6	10.1111/pbi.13020	CRISPR/SpCas9	DNA-stable	≥4	No detailed position of mismatch/es proximal to the PAM																											No	0.35
150	6	10.1111/pbi.13020	CRISPR/SpCas9	DNA-stable	≥4	No detailed position of mismatch/es proximal to the PAM																											No	0.35
150	6	10.1111/pbi.13020	CRISPR/SpCas9	DNA-stable	≥4	No detailed position of mismatch/es proximal to the PAM																											No	0.35
150	6	10.1111/pbi.13020	CRISPR/SpCas9	DNA-stable	≥4	No detailed position of mismatch/es proximal to the PAM																											No	0.35
150	6	10.1111/pbi.13020	CRISPR/SpCas9	DNA-stable	≥4	No detailed position of mismatch/es proximal to the PAM																											No	0.35
150	6	10.1111/pbi.13020	CRISPR/SpCas9	DNA-stable	≥4	No detailed position of mismatch/es proximal to the PAM																											No	0.35
150	6	10.1111/pbi.13020	CRISPR/SpCas9	DNA-stable	≥4	No detailed position of mismatch/es proximal to the PAM																											No	0.35
150	6	10.1111/pbi.13020	CRISPR/SpCas9	DNA-stable	≥4	No detailed position of mismatch/es proximal to the PAM																											No	0.35
150	6	10.1111/pbi.13020	CRISPR/SpCas9	DNA-stable	≥4	No detailed position of mismatch/es proximal to the PAM																											No	0.35
150	6	10.1111/pbi.13020	CRISPR/SpCas9	DNA-stable	≥4	No detailed position of mismatch/es proximal to the PAM																											No	0.35
150	6	10.1111/pbi.13020	CRISPR/SpCas9	DNA-stable	≥4	No detailed position of mismatch/es proximal to the PAM																											No	0.35
150	6	10.1111/pbi.13020	CRISPR/SpCas9	DNA-stable	≥4	No detailed position of mismatch/es proximal to the PAM																											No	0.35
150	6	10.1111/pbi.13020	CRISPR/SpCas9	DNA-stable	≥4	No detailed position of mismatch/es proximal to the PAM																											No	0.35
150	6	10.1111/pbi.13020	CRISPR/SpCas9	DNA-stable	≥4	No detailed position of mismatch/es proximal to the PAM																											No	0.35
150	6	10.1111/pbi.13020	CRISPR/SpCas9	DNA-stable	≥4	No detailed position of mismatch/es proximal to the PAM																											No	0.35
150	6	10.1111/pbi.13020	CRISPR/SpCas9	DNA-stable	≥4	No detailed position of mismatch/es proximal to the PAM																											No	0.35
150	6	10.1111/pbi.13020	CRISPR/SpCas9	DNA-stable	≥4	No detailed position of mismatch/es proximal to the PAM																											No	0.35
150	6	10.1111/pbi.13020	CRISPR/SpCas9	DNA-stable	≥4	No detailed position of mismatch/es proximal to the PAM																											No	0.35
150	6	10.1111/pbi.13020	CRISPR/SpCas9	DNA-stable	≥4	No detailed position of mismatch/es proximal to the PAM																											No	0.35
150	6	10.1111/pbi.13020	CRISPR/SpCas9	DNA-stable	≥4	No detailed position of mismatch/es proximal to the PAM																											No	0.35
150	6	10.1111/pbi.13020	CRISPR/SpCas9	DNA-stable	≥4	No detailed position of mismatch/es proximal to the PAM																											No	0.35
150	6	10.1111/pbi.13020	CRISPR/SpCas9	DNA-stable	≥4	No detailed position of mismatch/es proximal to the PAM																											No	0.35
150	6	10.1111/pbi.13020	CRISPR/SpCas9	DNA-stable	≥4	No detailed position of mismatch/es proximal to the PAM																											No	0.35
150	6	10.1111/pbi.13020	CRISPR/SpCas9	DNA-stable	≥4	No detailed position of mismatch/es proximal to the PAM																											No	0.35
150	6	10.1111/pbi.13020	CRISPR/SpCas9	DNA-stable	≥4	No detailed position of mismatch/es proximal to the PAM																											No	0.35
150	6	10.1111/pbi.13020	CRISPR/SpCas9	DNA-stable	≥4	No detailed position of mismatch/es proximal to the PAM																											No	0.35
150	6	10.1111/pbi.13020	CRISPR/SpCas9	DNA-stable	≥4	No detailed position of mismatch/es proximal to the PAM																											No	0.35
150	6	10.1111/pbi.13020	CRISPR/SpCas9	DNA-stable	≥4	No detailed position of mismatch/es proximal to the PAM																											No	0.35
150	6	10.1111/pbi.13020	CRISPR/SpCas9	DNA-stable	≥4	No detailed position of mismatch/es proximal to the PAM																											No	0.35
150	6	10.1111/pbi.13020	CRISPR/SpCas9	DNA-stable	≥4	No detailed position of mismatch/es proximal to the PAM																											No	0.35
150	6	10.1111/pbi.13020	CRISPR/SpCas9	DNA-stable	≥4	No detailed position of mismatch/es proximal to the PAM																											No	0.35
150	6	10.1111/pbi.13020	CRISPR/SpCas9	DNA-stable	≥4	No detailed position of mismatch/es proximal to the PAM																											No	0.35
150	6	10.1111/pbi.13020	CRISPR/SpCas9	DNA-stable	≥4	No detailed position of mismatch/es proximal to the PAM																											No	0.35
150	6	10.1111/pbi.13020	CRISPR/SpCas9	DNA-stable	≥4	No detailed position of mismatch/es proximal to the PAM																											No	0.35
150	6	10.1111/pbi.13020	CRISPR/SpCas9	DNA-stable	≥4	No detailed position of mismatch/es proximal to the PAM																											No	0.35
150	6	10.1111/pbi.13020	CRISPR/SpCas9	DNA-stable	≥4	No detailed position of mismatch/es proximal to the PAM																											No	0.35
150	6	10.1111/pbi.13020	CRISPR/SpCas9	DNA-stable	≥4	No detailed position of mismatch/es proximal to the PAM																											No	0.35
150	6	10.1111/pbi.13020	CRISPR/SpCas9	DNA-stable	≥4	No detailed position of mismatch/es proximal to the PAM																											No	0.35
150	6	10.1111/pbi.13020	CRISPR/SpCas9	DNA-stable	≥4	No detailed position of mismatch/es proximal to the PAM																											No	0.35
150	6	10.1111/pbi.13020	CRISPR/SpCas9	DNA-stable	≥4	No detailed position of mismatch/es proximal to the PAM																											No	0.35
150	6	10.1111/pbi.13020	CRISPR/SpCas9	DNA-stable	≥4	No detailed position of mismatch/es proximal to the PAM																											No	0.35
150	6	10.1111/pbi.13020	CRISPR/SpCas9	DNA-stable	≥4	No detailed position of mismatch/es proximal to the PAM																											No	0.35
150	6	10.1111/pbi.13020	CRISPR/SpCas9	DNA-stable	≥4	No detailed position of mismatch/es proximal to the PAM																											No	0.35
150	6	10.1111/pbi.13020	CRISPR/SpCas9	DNA-stable	≥4	No detailed position of mismatch/es proximal to the PAM																											No	0.35
150	6	10.1111/pbi.13020	CRISPR/SpCas9	DNA-stable	≥4	No detailed position of mismatch/es proximal to the PAM																											No	0.35
150	6	10.1111/pbi.13020	CRISPR/SpCas9	DNA-stable	≥4	No detailed position of mismatch/es proximal to the PAM																											No	0.35
150	6	10.1111/pbi.13020	CRISPR/SpCas9	DNA-stable	≥4	No detailed position of mismatch/es proximal to the PAM																											No	0.35
150	6	10.1111/pbi.13020	CRISPR/SpCas9	DNA-stable	≥4	No detailed position of mismatch/es proximal to the PAM																											No	0.35
150	6	10.1111/pbi.13020	CRISPR/SpCas9	DNA-stable	≥4	No detailed position of mismatch/es proximal to the PAM																											No	0.35
150	6	10.1111/pbi.13020	CRISPR/SpCas9	DNA-stable	≥4	No detailed position of mismatch/es proximal to the PAM																											No	0.35
150	6	10.1111/pbi.13020	CRISPR/SpCas9	DNA-stable	≥4	No detailed position of mismatch/es proximal to the PAM																											No	0.35
150	6	10.1111/pbi.13020	CRISPR/SpCas9	DNA-stable	≥4	No detailed position of mismatch/es proximal to the PAM																											No	0.35
150	6	10.1111/pbi.13020	CRISPR/SpCas9	DNA-stable	≥4	No detailed position of mismatch/es proximal to the PAM																											No	0.35
150	6	10.1111/pbi.13020	CRISPR/SpCas9	DNA-stable	≥4	No detailed position of mismatch/es proximal to the PAM																											No	0.35
150	6	10.1111/pbi.13020	CRISPR/SpCas9	DNA-stable	≥4	No detailed position of mismatch/es proximal to the PAM																											No	0.35
150	6	10.1111/pbi.13020	CRISPR/SpCas9	DNA-stable	≥4	No detailed position of mismatch/es proximal to the PAM																											No	0.35
150	6	10.1111/pbi.13020	CRISPR/SpCas9	DNA-stable	≥4	No detailed position of mismatch/es proximal to the PAM																											No	0.35
150	6	10.1111/pbi.13020	CRISPR/SpCas9	DNA-stable	≥4	No detailed position of mismatch/es proximal to the PAM																											No	0.35
150	6	10.1111/pbi.13020	CRISPR/SpCas9	DNA-stable	≥4	No detailed position of mismatch/es proximal to the PAM																											No	0.35
150	6	10.1111/pbi.13020	CRISPR/SpCas9	DNA-stable	≥4	No detailed position of mismatch/es proximal to the PAM																											No	0.35
150	6	10.1111/pbi.13020	CRISPR/SpCas9	DNA-stable	≥4	No detailed position of mismatch/es proximal to the PAM																											No	0.35
150	6	10.1111/pbi.13020	CRISPR/SpCas9	DNA-stable	≥4	No detailed position of mismatch/es proximal to the PAM																											No	0.35
150	6	10.1111/pbi.13020	CRISPR/SpCas9	DNA-stable	≥4	No detailed position of mismatch/es proximal to the PAM																											No	0.35
150	6	10.1111/pbi.13020	CRISPR/SpCas9	DNA-stable	≥4	No detailed position of mismatch/es proximal to the PAM																											No	0.35
150	6	10.1111/pbi.13020	CRISPR/SpCas9	DNA-stable	≥4	No detailed position of mismatch/es proximal to the PAM																											No	0.35
150	6	10.1111/pbi.13020	CRISPR/SpCas9	DNA-stable	≥4	No detailed position of mismatch/es proximal to the PAM																											No	0.35
150	6	10.1111/pbi.13020	CRISPR/SpCas9	DNA-stable	≥4	No detailed position of mismatch/es proximal to the PAM																											No	0.35
150	6	10.1111/pbi.13020	CRISPR/SpCas9	DNA-stable	≥4	No detailed position of mismatch/es proximal to the PAM																											No	0.35
150	6	10.1111/pbi.13020	CRISPR/SpCas9	DNA-stable	≥4	No detailed position of mismatch/es proximal to the PAM																											No	0.35
150	6	10.1111/pbi.13020	CRISPR/SpCas9	DNA-stable	≥4	No detailed position of mismatch/es proximal to the PAM																											No	0.35
150	6	10.1111/pbi.13020	CRISPR/SpCas9	DNA-stable	≥4	No detailed position of mismatch/es proximal to the PAM																											No	0.35
150	6	10.1111/pbi.13020	CRISPR/SpCas9	DNA-stable	≥4	No detailed position of mismatch/es proximal to the PAM																											No	0.35
150	6	10.1111/pbi.13020	CRISPR/SpCas9	DNA-stable	≥4	No detailed position of mismatch/es proximal to the PAM																											No	0.35
150	6	10.1111/pbi.13020	CRISPR/SpCas9	DNA-stable	≥4	No detailed position of mismatch/es proximal to the PAM																											No	0.35
150	6	10.1111/pbi.13020	CRISPR/SpCas9	DNA-stable	≥4	No detailed position of mismatch/es proximal to the PAM																											No	0.35
150	6	10.1111/pbi.13020	CRISPR/SpCas9	DNA-stable	≥4	No detailed position of mismatch/es proximal to the PAM																											No	0.35
150	6	10.1111/pbi.13020	CRISPR/SpCas9	DNA-stable	≥4	No detailed position of mismatch/es proximal to the PAM																											No	0.35
150	6	10.1111/pbi.13020	CRISPR/SpCas9	DNA-stable	≥4	No detailed position of mismatch/es proximal to the PAM																											No	0.35
150	6	10.1111/pbi.13020	CRISPR/SpCas9	DNA-stable	≥4	No detailed position of mismatch/es proximal to the PAM																											No	0.35
150	6	10.1111/pbi.13020	CRISPR/SpCas9	DNA-stable	≥4	No detailed position of mismatch/es proximal to the PAM																											No	0.35
150	6	10.1111/pbi.13020	CRISPR/SpCas9	DNA-stable	≥4	No detailed position of mismatch/es proximal to the PAM																											No	0.35
150	6	10.1111/pbi.13020	CRISPR/SpCas9	DNA-stable	≥4	No detailed position of mismatch/es proximal to the PAM																											No	0.35
150	6	10.1111/pbi.13020	CRISPR/SpCas9	DNA-stable	≥4	No detailed position of mismatch/es proximal to the PAM																											No	0.35
150	6	10.1111/pbi.13020	CRISPR/SpCas9	DNA-stable	≥4	No detailed position of mismatch/es proximal to the PAM																											No	0.35
150	6	10.1111/pbi.13020	CRISPR/SpCas9	DNA-stable	≥4	No detailed position of mismatch/es proximal to the PAM																											No	0.35
150	6	10.1111/pbi.13020	CRISPR/SpCas9	DNA-stable	≥4	No detailed position of mismatch/es proximal to the PAM																											No	0.35
150	6	10.1111/pbi.13020	CRISPR/SpCas9	DNA-stable	≥4	No detailed position of mismatch/es proximal to the PAM																											No	0.35
150	6	10.1111/pbi.13020	CRISPR/SpCas9	DNA-stable	≥4	No detailed position of mismatch/es proximal to the PAM																											No	0.35
150	6	10.1111/pbi.13020	CRISPR/SpCas9	DNA-stable	≥4	No detailed position of mismatch/es proximal to the PAM																											No	0.35
150	6	10.1111/pbi.13020	CRISPR/SpCas9	DNA-stable	≥4	No detailed position of mismatch/es proximal to the PAM																											No	0.35
150	6	10.1111/pbi.13020	CRISPR/SpCas9	DNA-stable	≥4	No detailed position of mismatch/es proximal to the PAM																											No	0.35
150	6	10.1111/pbi.13020	CRISPR/SpCas9	DNA-stable	≥4	No detailed position of mismatch/es proximal to the PAM																											No	0.35
150	6	10.1111/pbi.13020	CRISPR/SpCas9	DNA-stable	≥4	No detailed position of mismatch/es proximal to the PAM																											No	0.35
150	6	10.1111/pbi.13020	CRISPR/SpCas9	DNA-stable	≥4	No detailed position of mismatch/es proximal to the PAM																											No	0.35
150	6	10.1111/pbi.13020	CRISPR/SpCas9	DNA-stable	≥4	No detailed position of mismatch/es proximal to the PAM																											No	0.35
150	6	10.1111/pbi.13020	CRISPR/SpCas9	DNA-stable	≥4	No detailed position of mismatch/es proximal to the PAM																											No	0.35
150	6	10.1111/pbi.13020	CRISPR/SpCas9	DNA-stable	≥4	No detailed position of mismatch/es proximal to the PAM																											No	0.35
150	6	10.1111/pbi.13020	CRISPR/SpCas9	DNA-stable	≥4	No detailed position of mismatch/es proximal to the PAM																											No	0.35
150	6	10.1111/pbi.13020	CRISPR/SpCas9	DNA-stable	≥4	No detailed position of mismatch/es proximal to the PAM																											No	0.35
150	6	10.1111/pbi.13020	CRISPR/SpCas9	DNA-stable	≥4	No detailed position of mismatch/es proximal to the PAM																											No	0.35
150	6	10.1111/pbi.13020	CRISPR/SpCas9	DNA-stable	≥4	No detailed position of mismatch/es proximal to the PAM																											No	0.35
150	6	10.1111/pbi.13020	CRISPR/SpCas9	DNA-stable	≥4	No detailed position of mismatch/es proximal to the PAM																											No	0.35
150	6	10.1111/pbi.13020	CRISPR/SpCas9	DNA-stable	≥4	No detailed position of mismatch/es proximal to the PAM																											No	0.35
150	6	10.1111/pbi.13020	CRISPR/SpCas9	DNA-stable	≥4	No detailed position of mismatch/es proximal to the PAM																											No	0.35
150	6	10.1111/pbi.13020	CRISPR/SpCas9	DNA-stable	≥4	No detailed position of mismatch/es proximal to the PAM																											No	0.35
150	6	10.1111/pbi.13020	CRISPR/SpCas9	DNA-stable	≥4	No detailed position of mismatch/es proximal to the PAM																											No	0.35
150	6	10.1111/pbi.13020	CRISPR/SpCas9	DNA-stable	≥4	No detailed position of mismatch/es proximal to the PAM																											No	0.35
150	6	10.1111/pbi.13020	CRISPR/SpCas9	DNA-stable	≥4	No detailed position of mismatch/es proximal to the PAM																											No	0.35
150	6	10.1111/pbi.13020	CRISPR/SpCas9	DNA-stable	≥4	No detailed position of mismatch/es proximal to the PAM																											No	0.35
150	6	10.1111/pbi.13020	CRISPR/SpCas9	DNA-stable	≥4	No detailed position of mismatch/es proximal to the PAM																											No	0.35
150	6	10.1111/pbi.13020	CRISPR/SpCas9	DNA-stable	≥4	No detailed position of mismatch/es proximal to the PAM																											No	0.35
150	6	10.1111/pbi.13020	CRISPR/SpCas9	DNA-stable	≥4	No detailed position of mismatch/es proximal to the PAM																											No	0.35
150	6	10.1111/pbi.13020	CRISPR/SpCas9	DNA-stable	≥4	No detailed position of mismatch/es proximal to the PAM																											No	0.35
150	6	10.1111/pbi.13020	CRISPR/SpCas9	DNA-stable	≥4	No detailed position of mismatch/es proximal to the PAM																											No	0.35
150	6	10.1111/pbi.13020	CRISPR/SpCas9	DNA-stable	≥4	No detailed position of mismatch/es proximal to the PAM																											No	0.35
150	6	10.1111/pbi.13020	CRISPR/SpCas9	DNA-stable	≥4	No detailed position of mismatch/es proximal to the PAM																											No	0.35
150	6	10.1111/pbi.13020	CRISPR/SpCas9	DNA-stable	≥4	No detailed position of mismatch/es proximal to the PAM																											No	0.35
150	6	10.1111/pbi.13020	CRISPR/SpCas9	DNA-stable	≥4	No detailed position of mismatch/es proximal to the PAM																											No	0.35
150	6	10.1111/pbi.13020	CRISPR/SpCas9	DNA-stable	≥4	No detailed position of mismatch/es proximal to the PAM																											No	0.35
150	6	10.1111/pbi.13020	CRISPR/SpCas9	DNA-stable	≥4	No detailed position of mismatch/es proximal to the PAM																											No	0.35
150	6	10.1111/pbi.13020	CRISPR/SpCas9	DNA-stable	≥4	No detailed position of mismatch/es proximal to the PAM																											No	0.35
150	6	10.1111/pbi.13020	CRISPR/SpCas9	DNA-stable	≥4	No detailed position of mismatch/es proximal to the PAM																											No	0.35
150	6	10.1111/pbi.13020	CRISPR/SpCas9	DNA-stable	≥4	No detailed position of mismatch/es proximal to the PAM																											No	0.35
150	6	10.1111/pbi.13020	CRISPR/SpCas9	DNA-stable	≥4	No detailed position of mismatch/es proximal to the PAM																											No	0.35
150	6	10.1111/pbi.13020	CRISPR/SpCas9	DNA-stable	≥4	No detailed position of mismatch/es proximal to the PAM																											No	0.35
150	6	10.1111/pbi.13020	CRISPR/SpCas9	DNA-stable	≥4	No detailed position of mismatch/es proximal to the PAM																											No	0.35
150	6	10.1111/pbi.13020	CRISPR/SpCas9	DNA-stable	≥4	No detailed position of mismatch/es proximal to the PAM																											No	0.35
150	6	10.1111/pbi.13020	CRISPR/SpCas9	DNA-stable	≥4	No detailed position of mismatch/es proximal to the PAM																											No	0.35
150	6	10.1111/pbi.13020	CRISPR/SpCas9	DNA-stable	≥4	No detailed position of mismatch/es proximal to the PAM																											No	0.35
150	6	10.1111/pbi.13020	CRISPR/SpCas9	DNA-stable	≥4	No detailed position of mismatch/es proximal to the PAM																											No	0.35
150	6	10.1111/pbi.13020	CRISPR/SpCas9	DNA-stable	≥4	No detailed position of mismatch/es proximal to the PAM																											No	0.35
150	6	10.1111/pbi.13020	CRISPR/SpCas9	DNA-stable	≥4	No detailed position of mismatch/es proximal to the PAM																											No	0.35
150	6	10.1111/pbi.13020	CRISPR/SpCas9	DNA-stable	≥4	No detailed position of mismatch/es proximal to the PAM																											No	0.35
150	6	10.1111/pbi.13020	CRISPR/SpCas9	DNA-stable	≥4	No detailed position of mismatch/es proximal to the PAM																											No	0.35
150	6	10.1111/pbi.13020	CRISPR/SpCas9	DNA-stable	≥4	No detailed position of mismatch/es proximal to the PAM																											No	0.35
150	6	10.1111/pbi.13020	CRISPR/SpCas9	DNA-stable	≥4	No detailed position of mismatch/es proximal to the PAM																											No	0.35
150	6	10.1111/pbi.13020	CRISPR/SpCas9	DNA-stable	≥4	No detailed position of mismatch/es proximal to the PAM																											No	0.35
150	6	10.1111/pbi.13020	CRISPR/SpCas9	DNA-stable	≥4	No detailed position of mismatch/es proximal to the PAM																											No	0.35
150	6	10.1111/pbi.13020	CRISPR/SpCas9	DNA-stable	≥4	No detailed position of mismatch/es proximal to the PAM																											No	0.35
150	6	10.1111/pbi.13020	CRISPR/SpCas9	DNA-stable	≥4	No detailed position of mismatch/es proximal to the PAM																											No	0.35
150	6	10.1111/pbi.13020	CRISPR/SpCas9	DNA-stable	≥4	No detailed position of mismatch/es proximal to the PAM																											No	0.35
150	6	10.1111/pbi.13020	CRISPR/SpCas9	DNA-stable	≥4	No detailed position of mismatch/es proximal to the PAM																											No	0.35
150	6	10.1111/pbi.13020	CRISPR/SpCas9	DNA-stable	≥4	No detailed position of mismatch/es proximal to the PAM																											No	0.35
150	6	10.1111/pbi.13020	CRISPR/SpCas9	DNA-stable	≥4	No detailed position of mismatch/es proximal to the PAM																											No	0.35
150	6	10.1111/pbi.13020	CRISPR/SpCas9	DNA-stable	≥4	No detailed position of mismatch/es proximal to the PAM																											No	0.35
150	6	10.1111/pbi.13020	CRISPR/SpCas9	DNA-stable	≥4	No detailed position of mismatch/es proximal to the PAM																											No	0.35
150	6	10.1111/pbi.13020	CRISPR/SpCas9	DNA-stable	≥4	No detailed position of mismatch/es proximal to the PAM																											No	0.35
150	6	10.1111/pbi.13020	CRISPR/SpCas9	DNA-stable	≥4	No detailed position of mismatch/es proximal to the PAM																											No	0.35
150	6	10.1111/pbi.13020	CRISPR/SpCas9	DNA-stable	≥4	No detailed position of mismatch/es proximal to the PAM																											No	0.35
150	6	10.1111/pbi.13020	CRISPR/SpCas9	DNA-stable	≥4	No detailed position of mismatch/es proximal to the PAM																											No	0.35
150	6	10.1111/pbi.13020	CRISPR/SpCas9	DNA-stable	≥4	No detailed position of mismatch/es proximal to the PAM																											No	0.35
150	6	10.1111/pbi.13020	CRISPR/SpCas9	DNA-stable	≥4	No detailed position of mismatch/es proximal to the PAM																											No	0.35
150	6	10.1111/pbi.13020	CRISPR/SpCas9	DNA-stable	≥4	No detailed position of mismatch/es proximal to the PAM																											No	0.35
150	6	10.1111/pbi.13020	CRISPR/SpCas9	DNA-stable	≥4	No detailed position of mismatch/es proximal to the PAM																											No	0.35
150	6	10.1111/pbi.13020	CRISPR/SpCas9	DNA-stable	≥4	No detailed position of mismatch/es proximal to the PAM																											No	0.35
150	6	10.1111/pbi.13020	CRISPR/SpCas9	DNA-stable	≥4	No detailed position of mismatch/es proximal to the PAM																											No	0.35
150	6	10.1111/pbi.13020	CRISPR/SpCas9	DNA-stable	≥4	No detailed position of mismatch/es proximal to the PAM																											No	0.35
150	6	10.1111/pbi.13020	CRISPR/SpCas9	DNA-stable	≥4	No detailed position of mismatch/es proximal to the PAM																											No	0.35
150	6	10.1111/pbi.13020	CRISPR/SpCas9	DNA-stable	≥4	No detailed position of mismatch/es proximal to the PAM																											No	0.35
150	6	10.1111/pbi.13020	CRISPR/SpCas9	DNA-stable	≥4	No detailed position of mismatch/es proximal to the PAM																											No	0.35
150	6	10.1111/pbi.13020	CRISPR/SpCas9	DNA-stable	≥4	No detailed position of mismatch/es proximal to the PAM																											No	0.35
150	6	10.1111/pbi.13020	CRISPR/SpCas9	DNA-stable	≥4	No detailed position of mismatch/es proximal to the PAM																											No	0.35
150	6	10.1111/pbi.13020	CRISPR/SpCas9	DNA-stable	≥4	No detailed position of mismatch/es proximal to the PAM																											No	0.35
150	6	10.1111/pbi.13020	CRISPR/SpCas9	DNA-stable	≥4	No detailed position of mismatch/es proximal to the PAM																											No	0.35
150	6	10.1111/pbi.13020	CRISPR/SpCas9	DNA-stable	≥4	No detailed position of mismatch/es proximal to the PAM																											No	0.35
150	6	10.1111/pbi.13020	CRISPR/SpCas9	DNA-stable	≥4	No detailed position of mismatch/es proximal to the PAM																											No	0.35
150	6	10.1111/pbi.13020	CRISPR/SpCas9	DNA-stable	≥4	No detailed position of mismatch/es proximal to the PAM																											No	0.35
150	6	10.1111/pbi.13020	CRISPR/SpCas9	DNA-stable	≥4	No detailed position of mismatch/es proximal to the PAM																											No	0.35
150	6	10.1111/pbi.13020	CRISPR/SpCas9	DNA-stable	≥4	No detailed position of mismatch/es proximal to the PAM																											No	0.35
150	6	10.1111/pbi.13020	CRISPR/SpCas9	DNA-stable	≥4	No detailed position of mismatch/es proximal to the PAM																											No	0.35
150	6	10.1111/pbi.13020	CRISPR/SpCas9	DNA-stable	≥4	No detailed position of mismatch/es proximal to the PAM																											No	0.35
150	6	10.1111/pbi.13020	CRISPR/SpCas9	DNA-stable	≥4	No detailed position of mismatch/es proximal to the PAM																											No	0.35
150	6	10.1111/pbi.13020	CRISPR/SpCas9	DNA-stable	≥4	No detailed position of mismatch/es proximal to the PAM																											No	0.35
150	6	10.1111/pbi.13020	CRISPR/SpCas9	DNA-stable	≥4	No detailed position of mismatch/es proximal to the PAM																											No	0.35
150	6	10.1111/pbi.13020	CRISPR/SpCas9	DNA-stable	≥4	No detailed position of mismatch/es proximal to the PAM																											No	0.35
150	6	10.1111/pbi.13020	CRISPR/SpCas9	DNA-stable	≥4	No detailed position of mismatch/es proximal to the PAM																											No	0.35
150	6	10.1111/pbi.13020	CRISPR/SpCas9	DNA-stable	≥4	No detailed position of mismatch/es proximal to the PAM																											No	0.35
150	6	10.1111/pbi.13020	CRISPR/SpCas9	DNA-stable	≥4	No detailed position of mismatch/es proximal to the PAM																											No	0.35
150	6	10.1111/pbi.13020	CRISPR/SpCas9	DNA-stable	≥4	No detailed position of mismatch/es proximal to the PAM																											No	0.35
150	6	10.1111/pbi.13020	CRISPR/SpCas9	DNA-stable	≥4	No detailed position of mismatch/es proximal to the PAM																											No	0.35
150	6	10.1111/pbi.13020	CRISPR/SpCas9	DNA-stable	≥4	No detailed position of mismatch/es proximal to the PAM																											No	0.35
150	6	10.1111/pbi.13020	CRISPR/SpCas9	DNA-stable	≥4	No detailed position of mismatch/es proximal to the PAM																											No	0.35
150	6	10.1111/pbi.13020	CRISPR/SpCas9	DNA-stable	≥4	No detailed position of mismatch/es proximal to the PAM																											No	0.35
150	6	10.1111/pbi.13020	CRISPR/SpCas9	DNA-stable	≥4	No detailed position of mismatch/es proximal to the PAM																											No	0.35
150	6	10.1111/pbi.13020	CRISPR/SpCas9	DNA-stable	≥4	No detailed position of mismatch/es proximal to the PAM																											No	0.35
150	6	10.1111/pbi.13020	CRISPR/SpCas9	DNA-stable	≥4	No detailed position of mismatch/es proximal to the PAM																											No	0.35
150	6	10.1111/pbi.13020	CRISPR/SpCas9	DNA-stable	≥4	No detailed position of mismatch/es proximal to the PAM																											No	0.35
150	6	10.1111/pbi.13020	CRISPR/SpCas9	DNA-stable	≥4	No detailed position of mismatch/es proximal to the PAM																											No	0.35
150	6	10.1111/pbi.13020	CRISPR/SpCas9	DNA-stable	≥4	No detailed position of mismatch/es proximal to the PAM																											No	0.35
150	6	10.1111/pbi.13020	CRISPR/SpCas9	DNA-stable	≥4	No detailed position of mismatch/es proximal to the PAM																											No	0.35
150	6	10.1111/pbi.13020	CRISPR/SpCas9	DNA-stable	≥4	No detailed position of mismatch/es proximal to the PAM																											No	0.35
150	6	10.1111/pbi.13020	CRISPR/SpCas9	DNA-stable	≥4	No detailed position of mismatch/es proximal to the PAM																											No	0.35
150	6	10.1111/pbi.13020	CRISPR/SpCas9	DNA-stable	≥4	No detailed position of mismatch/es proximal to the PAM																											No	0.35
150	6	10.1111/pbi.13020	CRISPR/SpCas9	DNA-stable	≥4	No detailed position of mismatch/es proximal to the PAM																											No	0.35
150	6	10.1111/pbi.13020	CRISPR/SpCas9	DNA-stable	≥4	No detailed position of mismatch/es proximal to the PAM																											No	0.35
150	6	10.1111/pbi.13020	CRISPR/SpCas9	DNA-stable	≥4	No detailed position of mismatch/es proximal to the PAM																											No	0.35
150	6	10.1111/pbi.13020	CRISPR/SpCas9	DNA-stable	≥4	No detailed position of mismatch/es proximal to the PAM																											No	0.35
150	6	10.1111/pbi.13020	CRISPR/SpCas9	DNA-stable	≥4	No detailed position of mismatch/es proximal to the PAM																											No	0.35
150	6	10.1111/pbi.13020	CRISPR/SpCas9	DNA-stable	≥4	No detailed position of mismatch/es proximal to the PAM																											No	0.35
150	6	10.1111/pbi.13020	CRISPR/SpCas9	DNA-stable	≥4	No detailed position of mismatch/es proximal to the PAM																											No	0.35
150	6	10.1111/pbi.13020	CRISPR/SpCas9	DNA-stable	≥4	No detailed position of mismatch/es proximal to the PAM																											No	0.35
150	6	10.1111/pbi.13020	CRISPR/SpCas9	DNA-stable	≥4	No detailed position of mismatch/es proximal to the PAM																											No	0.35
150	6	10.1111/pbi.13020	CRISPR/SpCas9	DNA-stable	≥4	No detailed position of mismatch/es proximal to the PAM																											No	0.35
150	6	10.1111/pbi.13020	CRISPR/SpCas9	DNA-stable	≥4	No detailed position of mismatch/es proximal to the PAM																											No	0.35
150	6	10.1111/pbi.13020	CRISPR/SpCas9	DNA-stable	≥4	No detailed position of mismatch/es proximal to the PAM																											No	0.35
150	6	10.1111/pbi.13020	CRISPR/SpCas9	DNA-stable	≥4	No detailed position of mismatch/es proximal to the PAM																											No	0.35
150	6	10.1111/pbi.13020	CRISPR/SpCas9	DNA-stable	≥4	No detailed position of mismatch/es proximal to the PAM																											No	0.35
150	6	10.1111/pbi.13020	CRISPR/SpCas9	DNA-stable	≥4	No detailed position of mismatch/es proximal to the PAM																											No	0.35
150	6	10.1111/pbi.13020	CRISPR/SpCas9	DNA-stable	≥4	No detailed position of mismatch/es proximal to the PAM																											No	0.35
150	6	10.1111/pbi.13020	CRISPR/SpCas9	DNA-stable	≥4	No detailed position of mismatch/es proximal to the PAM																											No	0.35
150	6	10.1111/pbi.13020	CRISPR/SpCas9	DNA-stable	≥4	No detailed position of mismatch/es proximal to the PAM																											No	0.35
150	6	10.1111/pbi.13020	CRISPR/SpCas9	DNA-stable	≥4	No detailed position of mismatch/es proximal to the PAM																											No	0.35
150	6	10.1111/pbi.13020	CRISPR/SpCas9	DNA-stable	≥4	No detailed position of mismatch/es proximal to the PAM																											No	0.35
150	6	10.1111/pbi.13020	CRISPR/SpCas9	DNA-stable	≥4	No detailed position of mismatch/es proximal to the PAM																											No	0.35
150	6	10.1111/pbi.13020	CRISPR/SpCas9	DNA-stable	≥4	No detailed position of mismatch/es proximal to the PAM																											No	0.35
150	6	10.1111/pbi.13020	CRISPR/SpCas9	DNA-stable	≥4	No detailed position of mismatch/es proximal to the PAM																											No	0.35
150	6	10.1111/pbi.13020	CRISPR/SpCas9	DNA-stable	≥4	No detailed position of mismatch/es proximal to the PAM																											No	0.35
150	6	10.1111/pbi.13020	CRISPR/SpCas9	DNA-stable	≥4	No detailed position of mismatch/es proximal to the PAM																											No	0.35
150	6	10.1111/pbi.13020	CRISPR/SpCas9	DNA-stable	≥4	No detailed position of mismatch/es proximal to the PAM																											No	0.35
150	6	10.1111/pbi.13020	CRISPR/SpCas9	DNA-stable	≥4	No detailed position of mismatch/es proximal to the PAM																											No	0.35
150	6	10.1111/pbi.13020	CRISPR/SpCas9	DNA-stable	≥4	No detailed position of mismatch/es proximal to the PAM																											No	0.35
150	6	10.1111/pbi.13020	CRISPR/SpCas9	DNA-stable	≥4	No detailed position of mismatch/es proximal to the PAM																											No	0.35
150	6	10.1111/pbi.13020	CRISPR/SpCas9	DNA-stable	≥4	No detailed position of mismatch/es proximal to the PAM																											No	0.35
150	6	10.1111/pbi.13020	CRISPR/SpCas9	DNA-stable	≥4	No detailed position of mismatch/es proximal to the PAM																											No	0.35
150	6	10.1111/pbi.13020	CRISPR/SpCas9	DNA-stable	≥4	No detailed position of mismatch/es proximal to the PAM																											No	0.35
150	6	10.1111/pbi.13020	CRISPR/SpCas9	DNA-stable	≥4	No detailed position of mismatch/es proximal to the PAM																											No	0.35
150	6	10.1111/pbi.13020	CRISPR/SpCas9	DNA-stable	≥4	No detailed position of mismatch/es proximal to the PAM																											No	0.35
150	6	10.1111/pbi.13020	CRISPR/SpCas9	DNA-stable	≥4	No detailed position of mismatch/es proximal to the PAM																											No	0.35
150	6	10.1111/pbi.13020	CRISPR/SpCas9	DNA-stable	≥4	No detailed position of mismatch/es proximal to the PAM																											No	0.35
150	6	10.1111/pbi.13020	CRISPR/SpCas9	DNA-stable	≥4	No detailed position of mismatch/es proximal to the PAM																											No	0.35
150	6	10.1111/pbi.13020	CRISPR/SpCas9	DNA-stable	≥4	No detailed position of mismatch/es proximal to the PAM																											No	0.35
150	6	10.1111/pbi.13020	CRISPR/SpCas9	DNA-stable	≥4	No detailed position of mismatch/es proximal to the PAM																											No	0.35
150	6	10.1111/pbi.13020	CRISPR/SpCas9	DNA-stable	≥4	No detailed position of mismatch/es proximal to the PAM																											No	0.35
150	6	10.1111/pbi.13020	CRISPR/SpCas9	DNA-stable	≥4	No detailed position of mismatch/es proximal to the PAM																											No	0.35
150	6	10.1111/pbi.13020	CRISPR/SpCas9	DNA-stable	≥4	No detailed position of mismatch/es proximal to the PAM																											No	0.35
150	6	10.1111/pbi.13020	CRISPR/SpCas9	DNA-stable	≥4	No detailed position of mismatch/es proximal to the PAM																											No	0.35
150	6	10.1111/pbi.13020	CRISPR/SpCas9	DNA-stable	≥4	No detailed position of mismatch/es proximal to the PAM																											No	0.35
150	6	10.1111/pbi.13020	CRISPR/SpCas9	DNA-stable	≥4	No detailed position of mismatch/es proximal to the PAM																											No	0.35
150	6	10.1111/pbi.13020	CRISPR/SpCas9	DNA-stable	≥4	No detailed position of mismatch/es proximal to the PAM																											No	0.35
150	6	10.1111/pbi.13020	CRISPR/SpCas9	DNA-stable	≥4	No detailed position of mismatch/es proximal to the PAM																											No	0.35
150	6	10.1111/pbi.13020	CRISPR/SpCas9	DNA-stable	≥4	No detailed position of mismatch/es proximal to the PAM																											No	0.35
150	6	10.1111/pbi.13020	CRISPR/SpCas9	DNA-stable	≥4	No detailed position of mismatch/es proximal to the PAM																											No	0.35
150	6	10.1111/pbi.13020	CRISPR/SpCas9	DNA-stable	≥4	No detailed position of mismatch/es proximal to the PAM																											No	0.35
150	6	10.1111/pbi.13020	CRISPR/SpCas9	DNA-stable	≥4	No detailed position of mismatch/es proximal to the PAM																											No	0.35
150	6	10.1111/pbi.13020	CRISPR/SpCas9	DNA-stable	≥4	No detailed position of mismatch/es proximal to the PAM																											No	0.35
150	6	10.1111/pbi.13020	CRISPR/SpCas9	DNA-stable	≥4	No detailed position of mismatch/es proximal to the PAM																											No	0.35
150	6	10.1111/pbi.13020	CRISPR/SpCas9	DNA-stable	≥4	No detailed position of mismatch/es proximal to the PAM																											No	0.35
150	6	10.1111/pbi.13020	CRISPR/SpCas9	DNA-stable	≥4	No detailed position of mismatch/es proximal to the PAM																											No	0.35
150	6	10.1111/pbi.13020	CRISPR/SpCas9	DNA-stable	≥4	No detailed position of mismatch/es proximal to the PAM																											No	0.35
150	6	10.1111/pbi.13020	CRISPR/SpCas9	DNA-stable	≥4	No detailed position of mismatch/es proximal to the PAM																											No	0.35
150	6	10.1111/pbi.13020	CRISPR/SpCas9	DNA-stable	≥4	No detailed position of mismatch/es proximal to the PAM																											No	0.35
150	6	10.1111/pbi.13020	CRISPR/SpCas9	DNA-stable	≥4	No detailed position of mismatch/es proximal to the PAM																											No	0.35
150	6	10.1111/pbi.13020	CRISPR/SpCas9	DNA-stable	≥4	No detailed position of mismatch/es proximal to the PAM																											No	0.35
150	6	10.1111/pbi.13020	CRISPR/SpCas9	DNA-stable	≥4	No detailed position of mismatch/es proximal to the PAM																											No	0.35
150	6	10.1111/pbi.13020	CRISPR/SpCas9	DNA-stable	≥4	No detailed position of mismatch/es proximal to the PAM																											No	0.35
150	6	10.1111/pbi.13020	CRISPR/SpCas9	DNA-stable	≥4	No detailed position of mismatch/es proximal to the PAM																											No	0.35
150	6	10.1111/pbi.13020	CRISPR/SpCas9	DNA-stable	≥4	No detailed position of mismatch/es proximal to the PAM																											No	0.35
150	6	10.1111/pbi.13020	CRISPR/SpCas9	DNA-stable	≥4	No detailed position of mismatch/es proximal to the PAM																											No	0.35
150	6	10.1111/pbi.13020	CRISPR/SpCas9	DNA-stable	≥4	No detailed position of mismatch/es proximal to the PAM																											No	0.35
150	6	10.1111/pbi.13020	CRISPR/SpCas9	DNA-stable	≥4	No detailed position of mismatch/es proximal to the PAM																											No	0.35
150	6	10.1111/pbi.13020	CRISPR/SpCas9	DNA-stable	≥4	No detailed position of mismatch/es proximal to the PAM																											No	0.35
150	6	10.1111/pbi.13020	CRISPR/SpCas9	DNA-stable	≥4	No detailed position of mismatch/es proximal to the PAM																											No	0.35
150	6	10.1111/pbi.13020	CRISPR/SpCas9	DNA-stable	≥4	No detailed position of mismatch/es proximal to the PAM																											No	0.35
150	6	10.1111/pbi.13020	CRISPR/SpCas9	DNA-stable	≥4	No detailed position of mismatch/es proximal to the PAM																											No	0.35
150	6	10.1111/pbi.13020	CRISPR/SpCas9	DNA-stable	≥4	No detailed position of mismatch/es proximal to the PAM																											No	0.35
150	6	10.1111/pbi.13020	CRISPR/SpCas9	DNA-stable	≥4	No detailed position of mismatch/es proximal to the PAM																											No	0.35
150	6	10.1111/pbi.13020	CRISPR/SpCas9	DNA-stable	≥4	No detailed position of mismatch/es proximal to the PAM																											No	0.35
150	6	10.1111/pbi.13020	CRISPR/SpCas9	DNA-stable	≥4	No detailed position of mismatch/es proximal to the PAM																											No	0.35
150	6	10.1111/pbi.13020	CRISPR/SpCas9	DNA-stable	≥4	No detailed position of mismatch/es proximal to the PAM																											No	0.35
150	6	10.1111/pbi.13020	CRISPR/SpCas9	DNA-stable	≥4	No detailed position of mismatch/es proximal to the PAM																											No	0.35
150	6	10.1111/pbi.13020	CRISPR/SpCas9	DNA-stable	≥4	No detailed position of mismatch/es proximal to the PAM																											No	0.35
150	6	10.1111/pbi.13020	CRISPR/SpCas9	DNA-stable	≥4	No detailed position of mismatch/es proximal to the PAM																											No	0.35
150	6	10.1111/pbi.13020	CRISPR/SpCas9	DNA-stable	≥4	No detailed position of mismatch/es proximal to the PAM																											No	0.35
150	6	10.1111/pbi.13020	CRISPR/SpCas9	DNA-stable	≥4	No detailed position of mismatch/es proximal to the PAM																											No	0.35
150	6	10.1111/pbi.13020	CRISPR/SpCas9	DNA-stable	≥4	No detailed position of mismatch/es proximal to the PAM																											No	0.35
150	6	10.1111/pbi.13020	CRISPR/SpCas9	DNA-stable	≥4	No detailed position of mismatch/es proximal to the PAM																											No	0.35
150	6	10.1111/pbi.13020	CRISPR/SpCas9	DNA-stable	≥4	No detailed position of mismatch/es proximal to the PAM																											No	0.35
150	6	10.1111/pbi.13020	CRISPR/SpCas9	DNA-stable	≥4	No detailed position of mismatch/es proximal to the PAM																											No	0.35
150	6	10.1111/pbi.13020	CRISPR/SpCas9	DNA-stable	≥4	No detailed position of mismatch/es proximal to the PAM																											No	0.35
150	6	10.1111/pbi.13020	CRISPR/SpCas9	DNA-stable	≥4	No detailed position of mismatch/es proximal to the PAM																											No	0.35
150	6	10.1111/pbi.13020	CRISPR/SpCas9	DNA-stable	≥4	No detailed position of mismatch/es proximal to the PAM																											No	0.35
150	6	10.1111/pbi.13020	CRISPR/SpCas9	DNA-stable	≥4	No detailed position of mismatch/es proximal to the PAM																											No	0.35
150	6	10.1111/pbi.13020	CRISPR/SpCas9	DNA-stable	≥4	No detailed position of mismatch/es proximal to the PAM																											No	0.35
150	6	10.1111/pbi.13020	CRISPR/SpCas9	DNA-stable	≥4	No detailed position of mismatch/es proximal to the PAM																											No	0.35
150	6	10.1111/pbi.13020	CRISPR/SpCas9	DNA-stable	≥4	No detailed position of mismatch/es proximal to the PAM																											No	0.35
150	6	10.1111/pbi.13020	CRISPR/SpCas9	DNA-stable	≥4	No detailed position of mismatch/es proximal to the PAM																											No	0.35
150	6	10.1111/pbi.13020	CRISPR/SpCas9	DNA-stable	≥4	No detailed position of mismatch/es proximal to the PAM																											No	0.35
150	6	10.1111/pbi.13020	CRISPR/SpCas9	DNA-stable	≥4	No detailed position of mismatch/es proximal to the PAM																											No	0.35
150	6	10.1111/pbi.13020	CRISPR/SpCas9	DNA-stable	≥4	No detailed position of mismatch/es proximal to the PAM																											No	0.35
150	6	10.1111/pbi.13020	CRISPR/SpCas9	DNA-stable	≥4	No detailed position of mismatch/es proximal to the PAM																											No	0.35
150	6	10.1111/pbi.13020	CRISPR/SpCas9	DNA-stable	≥4	No detailed position of mismatch/es proximal to the PAM																											No	0.35
150	6	10.1111/pbi.13020	CRISPR/SpCas9	DNA-stable	≥4	No detailed position of mismatch/es proximal to the PAM																											No	0.35
150	6	10.1111/pbi.13020	CRISPR/SpCas9	DNA-stable	≥4	No detailed position of mismatch/es proximal to the PAM																											No	0.35
150	6	10.1111/pbi.13020	CRISPR/SpCas9	DNA-stable	≥4	No detailed position of mismatch/es proximal to the PAM																											No	0.35
150	6	10.1111/pbi.13020	CRISPR/SpCas9	DNA-stable	≥4	No detailed position of mismatch/es proximal to the PAM																											No	0.35
150	6	10.1111/pbi.13020	CRISPR/SpCas9	DNA-stable	≥4	No detailed position of mismatch/es proximal to the PAM																											No	0.35
150	6	10.1111/pbi.13020	CRISPR/SpCas9	DNA-stable	≥4	No detailed position of mismatch/es proximal to the PAM																											No	0.35
150	6	10.1111/pbi.13020	CRISPR/SpCas9	DNA-stable	≥4	No detailed position of mismatch/es proximal to the PAM																											No	0.35
150	6	10.1111/pbi.13020	CRISPR/SpCas9	DNA-stable	≥4	No detailed position of mismatch/es proximal to the PAM																											No	0.35
150	6	10.1111/pbi.13020	CRISPR/SpCas9	DNA-stable	≥4	No detailed position of mismatch/es proximal to the PAM																											No	0.35
150	6	10.1111/pbi.13020	CRISPR/SpCas9	DNA-stable	≥4	No detailed position of mismatch/es proximal to the PAM																											No	0.35
150	6	10.1111/pbi.13020	CRISPR/SpCas9	DNA-stable	≥4	No detailed position of mismatch/es proximal to the PAM																											No	0.35
150	6	10.1111/pbi.13020	CRISPR/SpCas9	DNA-stable	≥4	No detailed position of mismatch/es proximal to the PAM																											No	0.35
150	6	10.1111/pbi.13020	CRISPR/SpCas9	DNA-stable	≥4	No detailed position of mismatch/es proximal to the PAM																											No	0.35
150	6	10.1111/pbi.13020	CRISPR/SpCas9	DNA-stable	≥4	No detailed position of mismatch/es proximal to the PAM																											No	0.35
150	6	10.1111/pbi.13020	CRISPR/SpCas9	DNA-stable	≥4	No detailed position of mismatch/es proximal to the PAM																											No	0.35
150	6	10.1111/pbi.13020	CRISPR/SpCas9	DNA-stable	≥4	No detailed position of mismatch/es proximal to the PAM																											No	0.35
150	6	10.1111/pbi.13020	CRISPR/SpCas9	DNA-stable	≥4	No detailed position of mismatch/es proximal to the PAM																											No	0.35
150	6	10.1111/pbi.13020	CRISPR/SpCas9	DNA-stable	≥4	No detailed position of mismatch/es proximal to the PAM																											No	0.35
150	6	10.1111/pbi.13020	CRISPR/SpCas9	DNA-stable	≥4	No detailed position of mismatch/es proximal to the PAM																											No	0.35
150	6	10.1111/pbi.13020	CRISPR/SpCas9	DNA-stable	≥4	No detailed position of mismatch/es proximal to the PAM																											No	0.35
150	6	10.1111/pbi.13020	CRISPR/SpCas9	DNA-stable	≥4	No detailed position of mismatch/es proximal to the PAM																											No	0.35
150	6	10.1111/pbi.13020	CRISPR/SpCas9	DNA-stable	≥4	No detailed position of mismatch/es proximal to the PAM																											No	0.35
150	6	10.1111/pbi.13020	CRISPR/SpCas9	DNA-stable	≥4	No detailed position of mismatch/es proximal to the PAM																											No	0.35
150	6	10.1111/pbi.13020	CRISPR/SpCas9	DNA-stable	≥4	No detailed position of mismatch/es proximal to the PAM																											No	0.35
150	6	10.1111/pbi.13020	CRISPR/SpCas9	DNA-stable	≥4	No detailed position of mismatch/es proximal to the PAM																											No	0.35
150	6	10.1111/pbi.13020	CRISPR/SpCas9	DNA-stable	≥4	No detailed position of mismatch/es proximal to the PAM																											No	0.35
150	6	10.1111/pbi.13020	CRISPR/SpCas9	DNA-stable	≥4	No detailed position of mismatch/es proximal to the PAM																											No	0.35
150	6	10.1111/pbi.13020	CRISPR/SpCas9	DNA-stable	≥4	No detailed position of mismatch/es proximal to the PAM																											No	0.35
150	6	10.1111/pbi.13020	CRISPR/SpCas9	DNA-stable	≥4	No detailed position of mismatch/es proximal to the PAM																											No	0.35
150	6	10.1111/pbi.13020	CRISPR/SpCas9	DNA-stable	≥4	No detailed position of mismatch/es proximal to the PAM																											No	0.35
150	6	10.1111/pbi.13020	CRISPR/SpCas9	DNA-stable	≥4	No detailed position of mismatch/es proximal to the PAM																											No	0.35
150	6	10.1111/pbi.13020	CRISPR/SpCas9	DNA-stable	≥4	No detailed position of mismatch/es proximal to the PAM																											No	0.35
150	6	10.1111/pbi.13020	CRISPR/SpCas9	DNA-stable	≥4	No detailed position of mismatch/es proximal to the PAM																											No	0.35
150	6	10.1111/pbi.13020	CRISPR/SpCas9	DNA-stable	≥4	No detailed position of mismatch/es proximal to the PAM																											No	0.35
150	6	10.1111/pbi.13020	CRISPR/SpCas9	DNA-stable	≥4	No detailed position of mismatch/es proximal to the PAM																											No	0.35
150	6	10.1111/pbi.13020	CRISPR/SpCas9	DNA-stable	≥4	No detailed position of mismatch/es proximal to the PAM																											No	0.35
150	6	10.1111/pbi.13020	CRISPR/SpCas9	DNA-stable	≥4	No detailed position of mismatch/es proximal to the PAM																											No	0.35
150	6	10.1111/pbi.13020	CRISPR/SpCas9	DNA-stable	≥4	No detailed position of mismatch/es proximal to the PAM																											No	0.35
150	6	10.1111/pbi.13020	CRISPR/SpCas9	DNA-stable	≥4	No detailed position of mismatch/es proximal to the PAM																											No	0.35
150	6	10.1111/pbi.13020	CRISPR/SpCas9	DNA-stable	≥4	No detailed position of mismatch/es proximal to the PAM																											No	0.35
150	6	10.1111/pbi.13020	CRISPR/SpCas9	DNA-stable	≥4	No detailed position of mismatch/es proximal to the PAM																											No	0.35
150	6	10.1111/pbi.13020	CRISPR/SpCas9	DNA-stable	≥4	No detailed position of mismatch/es proximal to the PAM																											No	0.35
150	6	10.1111/pbi.13020	CRISPR/SpCas9	DNA-stable	≥4	No detailed position of mismatch/es proximal to the PAM																											No	0.35
150	6	10.1111/pbi.13020	CRISPR/SpCas9	DNA-stable	≥4	No detailed position of mismatch/es proximal to the PAM																											No	0.35
150	6	10.1111/pbi.13020	CRISPR/SpCas9	DNA-stable	≥4	No detailed position of mismatch/es proximal to the PAM																											No	0.35
150	6	10.1111/pbi.13020	CRISPR/SpCas9	DNA-stable	≥4	No detailed position of mismatch/es proximal to the PAM																											No	0.35
150	6	10.1111/pbi.13020	CRISPR/SpCas9	DNA-stable	≥4	No detailed position of mismatch/es proximal to the PAM																											No	0.35
150	6	10.1111/pbi.13020	CRISPR/SpCas9	DNA-stable	≥4	No detailed position of mismatch/es proximal to the PAM																											No	0.35
150	6	10.1111/pbi.13020	CRISPR/SpCas9	DNA-stable	≥4	No detailed position of mismatch/es proximal to the PAM																											No	0.35
150	6	10.1111/pbi.13020	CRISPR/SpCas9	DNA-stable	≥4	No detailed position of mismatch/es proximal to the PAM																											No	0.35
150	6	10.1111/pbi.13020	CRISPR/SpCas9	DNA-stable	≥4	No detailed position of mismatch/es proximal to the PAM																											No	0.35
150	6	10.1111/pbi.13020	CRISPR/SpCas9	DNA-stable	≥4	No detailed position of mismatch/es proximal to the PAM																											No	0.35
150	6	10.1111/pbi.13020	CRISPR/SpCas9	DNA-stable	≥4	No detailed position of mismatch/es proximal to the PAM																											No	0.35
150	6	10.1111/pbi.13020	CRISPR/SpCas9	DNA-stable	≥4	No detailed position of mismatch/es proximal to the PAM																											No	0.35
150	6	10.1111/pbi.13020	CRISPR/SpCas9	DNA-stable	≥4	No detailed position of mismatch/es proximal to the PAM																											No	0.35
150	6	10.1111/pbi.13020	CRISPR/SpCas9	DNA-stable	≥4	No detailed position of mismatch/es proximal to the PAM																											No	0.35
150	6	10.1111/pbi.13020	CRISPR/SpCas9	DNA-stable	≥4	No detailed position of mismatch/es proximal to the PAM																											No	0.35
150	6	10.1111/pbi.13020	CRISPR/SpCas9	DNA-stable	≥4	No detailed position of mismatch/es proximal to the PAM																											No	0.35
150	6	10.1111/pbi.13020	CRISPR/SpCas9	DNA-stable	≥4	No detailed position of mismatch/es proximal to the PAM																											No	0.35
150	6	10.1111/pbi.13020	CRISPR/SpCas9	DNA-stable	≥4	No detailed position of mismatch/es proximal to the PAM																											No	0.35
150	6	10.1111/pbi.13020	CRISPR/SpCas9	DNA-stable	≥4	No detailed position of mismatch/es proximal to the PAM																											No	0.35
150	6	10.1111/pbi.13020	CRISPR/SpCas9	DNA-stable	≥4	No detailed position of mismatch/es proximal to the PAM																											No	0.35
150	6	10.1111/pbi.13020	CRISPR/SpCas9	DNA-stable	≥4	No detailed position of mismatch/es proximal to the PAM																											No	0.35
150	6	10.1111/pbi.13020	CRISPR/SpCas9	DNA-stable	≥4	No detailed position of mismatch/es proximal to the PAM																											No	0.35
150	6	10.1111/pbi.13020	CRISPR/SpCas9	DNA-stable	≥4	No detailed position of mismatch/es proximal to the PAM																											No	0.35
150	6	10.1111/pbi.13020	CRISPR/SpCas9	DNA-stable	≥4	No detailed position of mismatch/es proximal to the PAM																											No	0.35
150	6	10.1111/pbi.13020	CRISPR/SpCas9	DNA-stable	≥4	No detailed position of mismatch/es proximal to the PAM																											No	0.35
150	6	10.1111/pbi.13020	CRISPR/SpCas9	DNA-stable	≥4	No detailed position of mismatch/es proximal to the PAM																											No	0.35
150	6	10.1111/pbi.13020	CRISPR/SpCas9	DNA-stable	≥4	No detailed position of mismatch/es proximal to the PAM																											No	0.35
150	6	10.1111/pbi.13020	CRISPR/SpCas9	DNA-stable	≥4	No detailed position of mismatch/es proximal to the PAM																											No	0.35
150	6	10.1111/pbi.13020	CRISPR/SpCas9	DNA-stable	≥4	No detailed position of mismatch/es proximal to the PAM																											No	0.35
150	6	10.1111/pbi.13020	CRISPR/SpCas9	DNA-stable	≥4	No detailed position of mismatch/es proximal to the PAM																											No	0.35
150	6	10.1111/pbi.13020	CRISPR/SpCas9	DNA-stable	≥4	No detailed position of mismatch/es proximal to the PAM																											No	0.35
150	6	10.1111/pbi.13020	CRISPR/SpCas9	DNA-stable	≥4	No detailed position of mismatch/es proximal to the PAM																											No	0.35
150	6	10.1111/pbi.13020	CRISPR/SpCas9	DNA-stable	≥4	No detailed position of mismatch/es proximal to the PAM																											No	0.35
150	6	10.1111/pbi.13020	CRISPR/SpCas9	DNA-stable	≥4	No detailed position of mismatch/es proximal to the PAM																											No	0.35
150	6	10.1111/pbi.13020	CRISPR/SpCas9	DNA-stable	≥4	No detailed position of mismatch/es proximal to the PAM																											No	0.35
150	6	10.1111/pbi.13020	CRISPR/SpCas9	DNA-stable	≥4	No detailed position of mismatch/es proximal to the PAM																											No	0.35
150	6	10.1111/pbi.13020	CRISPR/SpCas9	DNA-stable	≥4	No detailed position of mismatch/es proximal to the PAM																											No	0.35
150	6	10.1111/pbi.13020	CRISPR/SpCas9	DNA-stable	≥4	No detailed position of mismatch/es proximal to the PAM																											No	0.35
150	6	10.1111/pbi.13020	CRISPR/SpCas9	DNA-stable	≥4	No detailed position of mismatch/es proximal to the PAM																											No	0.35
150	6	10.1111/pbi.13020	CRISPR/SpCas9	DNA-stable	≥4	No detailed position of mismatch/es proximal to the PAM																											No	0.35
150	6	10.1111/pbi.13020	CRISPR/SpCas9	DNA-stable	≥4	No detailed position of mismatch/es proximal to the PAM																											No	0.35
150	6	10.1111/pbi.13020	CRISPR/SpCas9	DNA-stable	≥4	No detailed position of mismatch/es proximal to the PAM																											No	0.35
150	6	10.1111/pbi.13020	CRISPR/SpCas9	DNA-stable	≥4	No detailed position of mismatch/es proximal to the PAM																											No	0.35
150	6	10.1111/pbi.13020	CRISPR/SpCas9	DNA-stable	≥4	No detailed position of mismatch/es proximal to the PAM																											No	0.35
150	6	10.1111/pbi.13020	CRISPR/SpCas9	DNA-stable	≥4	No detailed position of mismatch/es proximal to the PAM																											No	0.35
150	6	10.1111/pbi.13020	CRISPR/SpCas9	DNA-stable	≥4	No detailed position of mismatch/es proximal to the PAM																											No	0.35
150	6	10.1111/pbi.13020	CRISPR/SpCas9	DNA-stable	≥4	No detailed position of mismatch/es proximal to the PAM																											No	0.35
150	6	10.1111/pbi.13020	CRISPR/SpCas9	DNA-stable	≥4	No detailed position of mismatch/es proximal to the PAM																											No	0.35
150	6	10.1111/pbi.13020	CRISPR/SpCas9	DNA-stable	≥4	No detailed position of mismatch/es proximal to the PAM																											No	0.35
150	6	10.1111/pbi.13020	CRISPR/SpCas9	DNA-stable	≥4	No detailed position of mismatch/es proximal to the PAM																											No	0.35
150	6	10.1111/pbi.13020	CRISPR/SpCas9	DNA-stable	≥4	No detailed position of mismatch/es proximal to the PAM																											No	0.35
150	6	10.1111/pbi.13020	CRISPR/SpCas9	DNA-stable	≥4	No detailed position of mismatch/es proximal to the PAM																											No	0.35
150	6	10.1111/pbi.13020	CRISPR/SpCas9	DNA-stable	≥4	No detailed position of mismatch/es proximal to the PAM																											No	0.35
150	6	10.1111/pbi.13020	CRISPR/SpCas9	DNA-stable	≥4	No detailed position of mismatch/es proximal to the PAM																											No	0.35
150	6	10.1111/pbi.13020	CRISPR/SpCas9	DNA-stable	≥4	No detailed position of mismatch/es proximal to the PAM																											No	0.35
150	6	10.1111/pbi.13020	CRISPR/SpCas9	DNA-stable	≥4	No detailed position of mismatch/es proximal to the PAM																											No	0.35
150	6	10.1111/pbi.13020	CRISPR/SpCas9	DNA-stable	≥4	No detailed position of mismatch/es proximal to the PAM																											No	0.35
150	6	10.1111/pbi.13020	CRISPR/SpCas9	DNA-stable	≥4	No detailed position of mismatch/es proximal to the PAM																											No	0.35
150	6	10.1111/pbi.13020	CRISPR/SpCas9	DNA-stable	≥4	No detailed position of mismatch/es proximal to the PAM																											No	0.35
150	6	10.1111/pbi.13020	CRISPR/SpCas9	DNA-stable	≥4	No detailed position of mismatch/es proximal to the PAM																											No	0.35
150	6	10.1111/pbi.13020	CRISPR/SpCas9	DNA-stable	≥4	No detailed position of mismatch/es proximal to the PAM																											No	0.35
150	6	10.1111/pbi.13020	CRISPR/SpCas9	DNA-stable	≥4	No detailed position of mismatch/es proximal to the PAM																											No	0.35
150	6	10.1111/pbi.13020	CRISPR/SpCas9	DNA-stable	≥4	No detailed position of mismatch/es proximal to the PAM																											No	0.35
150	6	10.1111/pbi.13020	CRISPR/SpCas9	DNA-stable	≥4	No detailed position of mismatch/es proximal to the PAM																											No	0.35
150	6	10.1111/pbi.13020	CRISPR/SpCas9	DNA-stable	≥4	No detailed position of mismatch/es proximal to the PAM																											No	0.35
150	6	10.1111/pbi.13020	CRISPR/SpCas9	DNA-stable	≥4	No detailed position of mismatch/es proximal to the PAM																											No	0.35
150	6	10.1111/pbi.13020	CRISPR/SpCas9	DNA-stable	≥4	No detailed position of mismatch/es proximal to the PAM																											No	0.35
150	6	10.1111/pbi.13020	CRISPR/SpCas9	DNA-stable	≥4	No detailed position of mismatch/es proximal to the PAM																											No	0.35
150	6	10.1111/pbi.13020	CRISPR/SpCas9	DNA-stable	≥4	No detailed position of mismatch/es proximal to the PAM																											No	0.35
150	6	10.1111/pbi.13020	CRISPR/SpCas9	DNA-stable	≥4	No detailed position of mismatch/es proximal to the PAM																											No	0.35
150	6	10.1111/pbi.13020	CRISPR/SpCas9	DNA-stable	≥4	No detailed position of mismatch/es proximal to the PAM																											No	0.35
150	6	10.1111/pbi.13020	CRISPR/SpCas9	DNA-stable	≥4	No detailed position of mismatch/es proximal to the PAM																											No	0.35
150	6	10.1111/pbi.13020	CRISPR/SpCas9	DNA-stable	≥4	No detailed position of mismatch/es proximal to the PAM																											No	0.35
150	6	10.1111/pbi.13020	CRISPR/SpCas9	DNA-stable	≥4	No detailed position of mismatch/es proximal to the PAM																											No	0.35
150	6	10.1111/pbi.13020	CRISPR/SpCas9	DNA-stable	≥4	No detailed position of mismatch/es proximal to the PAM																											No	0.35
150	6	10.1111/pbi.13020	CRISPR/SpCas9	DNA-stable	≥4	No detailed position of mismatch/es proximal to the PAM																											No	0.35
150	6	10.1111/pbi.13020	CRISPR/SpCas9	DNA-stable	≥4	No detailed position of mismatch/es proximal to the PAM																											No	0.35
150	6	10.1111/pbi.13020	CRISPR/SpCas9	DNA-stable	≥4	No detailed position of mismatch/es proximal to the PAM																											No	0.35
150	6	10.1111/pbi.13020	CRISPR/SpCas9	DNA-stable	≥4	No detailed position of mismatch/es proximal to the PAM																											No	0.35
150	6	10.1111/pbi.13020	CRISPR/SpCas9	DNA-stable	≥4	No detailed position of mismatch/es proximal to the PAM																											No	0.35
150	6	10.1111/pbi.13020	CRISPR/SpCas9	DNA-stable	≥4	No detailed position of mismatch/es proximal to the PAM																											No	0.35
150	6	10.1111/pbi.13020	CRISPR/SpCas9	DNA-stable	≥4	No detailed position of mismatch/es proximal to the PAM																											No	0.35
150	6	10.1111/pbi.13020	CRISPR/SpCas9	DNA-stable	≥4	No detailed position of mismatch/es proximal to the PAM																											No	0.35
150	6	10.1111/pbi.13020	CRISPR/SpCas9	DNA-stable	≥4	No detailed position of mismatch/es proximal to the PAM																											No	0.35
150	6	10.1111/pbi.13020	CRISPR/SpCas9	DNA-stable	≥4	No detailed position of mismatch/es proximal to the PAM																											No	0.35
150	6	10.1111/pbi.13020	CRISPR/SpCas9	DNA-stable	≥4	No detailed position of mismatch/es proximal to the PAM																											No	0.35
150	6	10.1111/pbi.13020	CRISPR/SpCas9	DNA-stable	≥4	No detailed position of mismatch/es proximal to the PAM																											No	0.35
150	6	10.1111/pbi.13020	CRISPR/SpCas9	DNA-stable	≥4	No detailed position of mismatch/es proximal to the PAM																											No	0.35
150	6	10.1111/pbi.13020	CRISPR/SpCas9	DNA-stable	≥4	No detailed position of mismatch/es proximal to the PAM																											No	0.35
150	6	10.1111/pbi.13020	CRISPR/SpCas9	DNA-stable	≥4	No detailed position of mismatch/es proximal to the PAM																											No	0.35
150	6	10.1111/pbi.13020	CRISPR/SpCas9	DNA-stable	≥4	No detailed position of mismatch/es proximal to the PAM																											No	0.35
150	6	10.1111/pbi.13020	CRISPR/SpCas9	DNA-stable	≥4	No detailed position of mismatch/es proximal to the PAM																											No	0.35
150	6	10.1111/pbi.13020	CRISPR/SpCas9	DNA-stable	≥4	No detailed position of mismatch/es proximal to the PAM																											No	0.35
150	6	10.1111/pbi.13020	CRISPR/SpCas9	DNA-stable	≥4	No detailed position of mismatch/es proximal to the PAM																											No	0.35
150	6	10.1111/pbi.13020	CRISPR/SpCas9	DNA-stable	≥4	No detailed position of mismatch/es proximal to the PAM																											No	0.35
150	6	10.1111/pbi.13020	CRISPR/SpCas9	DNA-stable	≥4	No detailed position of mismatch/es proximal to the PAM																											No	0.35
150	6	10.1111/pbi.13020	CRISPR/SpCas9	DNA-stable	≥4	No detailed position of mismatch/es proximal to the PAM																											No	0.35
150	6	10.1111/pbi.13020	CRISPR/SpCas9	DNA-stable	≥4	No detailed position of mismatch/es proximal to the PAM																											No	0.35
150	6	10.1111/pbi.13020	CRISPR/SpCas9	DNA-stable	≥4	No detailed position of mismatch/es proximal to the PAM																											No	0.35
150	6	10.1111/pbi.13020	CRISPR/SpCas9	DNA-stable	≥4	No detailed position of mismatch/es proximal to the PAM																											No	0.35
150	6	10.1111/pbi.13020	CRISPR/SpCas9	DNA-stable	≥4	No detailed position of mismatch/es proximal to the PAM																											No	0.35
150	6	10.1111/pbi.13020	CRISPR/SpCas9	DNA-stable	≥4	No detailed position of mismatch/es proximal to the PAM																											No	0.35
150	6	10.1111/pbi.13020	CRISPR/SpCas9	DNA-stable	≥4	No detailed position of mismatch/es proximal to the PAM																											No	0.35
150	6	10.1111/pbi.13020	CRISPR/SpCas9	DNA-stable	≥4	No detailed position of mismatch/es proximal to the PAM																											No	0.35
150	6	10.1111/pbi.13020	CRISPR/SpCas9	DNA-stable	≥4	No detailed position of mismatch/es proximal to the PAM																											No	0.35
150	6	10.1111/pbi.13020	CRISPR/SpCas9	DNA-stable	≥4	No detailed position of mismatch/es proximal to the PAM																											No	0.35
150	6	10.1111/pbi.13020	CRISPR/SpCas9	DNA-stable	≥4	No detailed position of mismatch/es proximal to the PAM																											No	0.35
150	6	10.1111/pbi.13020	CRISPR/SpCas9	DNA-stable	≥4	No detailed position of mismatch/es proximal to the PAM																											No	0.35
150	6	10.1111/pbi.13020	CRISPR/SpCas9	DNA-stable	≥4	No detailed position of mismatch/es proximal to the PAM																											No	0.35
150	6	10.1111/pbi.13020	CRISPR/SpCas9	DNA-stable	≥4	No detailed position of mismatch/es proximal to the PAM																											No	0.35
150	6	10.1111/pbi.13020	CRISPR/SpCas9	DNA-stable	≥4	No detailed position of mismatch/es proximal to the PAM																											No	0.35
150	6	10.1111/pbi.13020	CRISPR/SpCas9	DNA-stable	≥4	No detailed position of mismatch/es proximal to the PAM																											No	0.35
150	6	10.1111/pbi.13020	CRISPR/SpCas9	DNA-stable	≥4	No detailed position of mismatch/es proximal to the PAM																											No	0.35
150	6	10.1111/pbi.13020	CRISPR/SpCas9	DNA-stable	≥4	No detailed position of mismatch/es proximal to the PAM																											No	0.35
150	6	10.1111/pbi.13020	CRISPR/SpCas9	DNA-stable	≥4	No detailed position of mismatch/es proximal to the PAM																											No	0.35
150	6	10.1111/pbi.13020	CRISPR/SpCas9	DNA-stable	≥4	No detailed position of mismatch/es proximal to the PAM																											No	0.35
150	6	10.1111/pbi.13020	CRISPR/SpCas9	DNA-stable	≥4	No detailed position of mismatch/es proximal to the PAM																											No	0.35
150	6	10.1111/pbi.13020	CRISPR/SpCas9	DNA-stable	≥4	No detailed position of mismatch/es proximal to the PAM																											No	0.35
150	6	10.1111/pbi.13020	CRISPR/SpCas9	DNA-stable	≥4	No detailed position of mismatch/es proximal to the PAM																											No	0.35
150	6	10.1111/pbi.13020	CRISPR/SpCas9	DNA-stable	≥4	No detailed position of mismatch/es proximal to the PAM																											No	0.35
150	6	10.1111/pbi.13020	CRISPR/SpCas9	DNA-stable	≥4	No detailed position of mismatch/es proximal to the PAM																											No	0.35
150	6	10.1111/pbi.13020	CRISPR/SpCas9	DNA-stable	≥4	No detailed position of mismatch/es proximal to the PAM																											No	0.35
150	6	10.1111/pbi.13020	CRISPR/SpCas9	DNA-stable	≥4	No detailed position of mismatch/es proximal to the PAM																											No	0.35
150	6	10.1111/pbi.13020	CRISPR/SpCas9	DNA-stable	≥4	No detailed position of mismatch/es proximal to the PAM																											No	0.35
150	6	10.1111/pbi.13020	CRISPR/SpCas9	DNA-stable	≥4	No detailed position of mismatch/es proximal to the PAM																											No	0.35
150	6	10.1111/pbi.13020	CRISPR/SpCas9	DNA-stable	≥4	No detailed position of mismatch/es proximal to the PAM																											No	0.35
150	6	10.1111/pbi.13020	CRISPR/SpCas9	DNA-stable	≥4	No detailed position of mismatch/es proximal to the PAM																											No	0.35
150	6	10.1111/pbi.13020	CRISPR/SpCas9	DNA-stable	≥4	No detailed position of mismatch/es proximal to the PAM																											No	0.35
150	6	10.1111/pbi.13020	CRISPR/SpCas9	DNA-stable	≥4	No detailed position of mismatch/es proximal to the PAM																											No	0.35
150	6	10.1111/pbi.13020	CRISPR/SpCas9	DNA-stable	≥4	No detailed position of mismatch/es proximal to the PAM																											No	0.35
150	6	10.1111/pbi.13020	CRISPR/SpCas9	DNA-stable	≥4	No detailed position of mismatch/es proximal to the PAM																											No	0.35
150	6	10.1111/pbi.13020	CRISPR/SpCas9	DNA-stable	≥4	No detailed position of mismatch/es proximal to the PAM																											No	0.35
150	6	10.1111/pbi.13020	CRISPR/SpCas9	DNA-stable	≥4	No detailed position of mismatch/es proximal to the PAM																											No	0.35
150	6	10.1111/pbi.13020	CRISPR/SpCas9	DNA-stable	≥4	No detailed position of mismatch/es proximal to the PAM																											No	0.35
150	6	10.1111/pbi.13020	CRISPR/SpCas9	DNA-stable	≥4	No detailed position of mismatch/es proximal to the PAM																											No	0.35
150	6	10.1111/pbi.13020	CRISPR/SpCas9	DNA-stable	≥4	No detailed position of mismatch/es proximal to the PAM																											No	0.35
150	6	10.1111/pbi.13020	CRISPR/SpCas9	DNA-stable	≥4	No detailed position of mismatch/es proximal to the PAM																											No	0.35
150	6	10.1111/pbi.13020	CRISPR/SpCas9	DNA-stable	≥4	No detailed position of mismatch/es proximal to the PAM																											No	0.35
150	6	10.1111/pbi.13020	CRISPR/SpCas9	DNA-stable	≥4	No detailed position of mismatch/es proximal to the PAM																											No	0.35
150	6	10.1111/pbi.13020	CRISPR/SpCas9	DNA-stable	≥4	No detailed position of mismatch/es proximal to the PAM																											No	0.35
150	6	10.1111/pbi.13020	CRISPR/SpCas9	DNA-stable	≥4	No detailed position of mismatch/es proximal to the PAM																											No	0.35
150	6	10.1111/pbi.13020	CRISPR/SpCas9	DNA-stable	≥4	No detailed position of mismatch/es proximal to the PAM																											No	0.35
150	6	10.1111/pbi.13020	CRISPR/SpCas9	DNA-stable	≥4	No detailed position of mismatch/es proximal to the PAM																											No	0.35
150	6	10.1111/pbi.13020	CRISPR/SpCas9	DNA-stable	≥4	No detailed position of mismatch/es proximal to the PAM																											No	0.35
150	6	10.1111/pbi.13020	CRISPR/SpCas9	DNA-stable	≥4	No detailed position of mismatch/es proximal to the PAM																											No	0.35
150	6	10.1111/pbi.13020	CRISPR/SpCas9	DNA-stable	≥4	No detailed position of mismatch/es proximal to the PAM																											No	0.35
150	6	10.1111/pbi.13020	CRISPR/SpCas9	DNA-stable	≥4	No detailed position of mismatch/es proximal to the PAM																											No	0.35
150	6	10.1111/pbi.13020	CRISPR/SpCas9	DNA-stable	≥4	No detailed position of mismatch/es proximal to the PAM																											No	0.35
150	6	10.1111/pbi.13020	CRISPR/SpCas9	DNA-stable	≥4	No detailed position of mismatch/es proximal to the PAM																											No	0.35
150	6	10.1111/pbi.13020	CRISPR/SpCas9	DNA-stable	≥4	No detailed position of mismatch/es proximal to the PAM																											No	0.35
150	6	10.1111/pbi.13020	CRISPR/SpCas9	DNA-stable	≥4	No detailed position of mismatch/es proximal to the PAM																											No	0.35
150	6	10.1111/pbi.13020	CRISPR/SpCas9	DNA-stable	≥4	No detailed position of mismatch/es proximal to the PAM																											No	0.35
150	6	10.1111/pbi.13020	CRISPR/SpCas9	DNA-stable	≥4	No detailed position of mismatch/es proximal to the PAM																											No	0.35
150	6	10.1111/pbi.13020	CRISPR/SpCas9	DNA-stable	≥4	No detailed position of mismatch/es proximal to the PAM																											No	0.35
150	6	10.1111/pbi.13020	CRISPR/SpCas9	DNA-stable	≥4	No detailed position of mismatch/es proximal to the PAM																											No	0.35
150	6	10.1111/pbi.13020	CRISPR/SpCas9	DNA-stable	≥4	No detailed position of mismatch/es proximal to the PAM																											No	0.35
150	6	10.1111/pbi.13020	CRISPR/SpCas9	DNA-stable	≥4	No detailed position of mismatch/es proximal to the PAM																											No	0.35
150	6	10.1111/pbi.13020	CRISPR/SpCas9	DNA-stable	≥4	No detailed position of mismatch/es proximal to the PAM																											No	0.35
150	6	10.1111/pbi.13020	CRISPR/SpCas9	DNA-stable	≥4	No detailed position of mismatch/es proximal to the PAM																											No	0.35
150	6	10.1111/pbi.13020	CRISPR/SpCas9	DNA-stable	≥4	No detailed position of mismatch/es proximal to the PAM																											No	0.35
150	6	10.1111/pbi.13020	CRISPR/SpCas9	DNA-stable	≥4	No detailed position of mismatch/es proximal to the PAM																											No	0.35
150	6	10.1111/pbi.13020	CRISPR/SpCas9	DNA-stable	≥4	No detailed position of mismatch/es proximal to the PAM																											No	0.35
150	6	10.1111/pbi.13020	CRISPR/SpCas9	DNA-stable	≥4	No detailed position of mismatch/es proximal to the PAM																											No	0.35
150	6	10.1111/pbi.13020	CRISPR/SpCas9	DNA-stable	≥4	No detailed position of mismatch/es proximal to the PAM																											No	0.35
150	6	10.1111/pbi.13020	CRISPR/SpCas9	DNA-stable	≥4	No detailed position of mismatch/es proximal to the PAM																											No	0.35
150	6	10.1111/pbi.13020	CRISPR/SpCas9	DNA-stable	≥4	No detailed position of mismatch/es proximal to the PAM																											No	0.35
150	6	10.1111/pbi.13020	CRISPR/SpCas9	DNA-stable	≥4	No detailed position of mismatch/es proximal to the PAM																											No	0.35
150	6	10.1111/pbi.13020	CRISPR/SpCas9	DNA-stable	≥4	No detailed position of mismatch/es proximal to the PAM																											No	0.35
150	6	10.1111/pbi.13020	CRISPR/SpCas9	DNA-stable	≥4	No detailed position of mismatch/es proximal to the PAM																											No	0.35
150	6	10.1111/pbi.13020	CRISPR/SpCas9	DNA-stable	≥4	No detailed position of mismatch/es proximal to the PAM																											No	0.35
150	6	10.1111/pbi.13020	CRISPR/SpCas9	DNA-stable	≥4	No detailed position of mismatch/es proximal to the PAM																											No	0.35
150	6	10.1111/pbi.13020	CRISPR/SpCas9	DNA-stable	≥4	No detailed position of mismatch/es proximal to the PAM																											No	0.35
150	6	10.1111/pbi.13020	CRISPR/SpCas9	DNA-stable	≥4	No detailed position of mismatch/es proximal to the PAM																											No	0.35
150	6	10.1111/pbi.13020	CRISPR/SpCas9	DNA-stable	≥4	No detailed position of mismatch/es proximal to the PAM																											No	0.35
150	6	10.1111/pbi.13020	CRISPR/SpCas9	DNA-stable	≥4	No detailed position of mismatch/es proximal to the PAM																											No	0.35
150	6	10.1111/pbi.13020	CRISPR/SpCas9	DNA-stable	≥4	No detailed position of mismatch/es proximal to the PAM																											No	0.35
150	6	10.1111/pbi.13020	CRISPR/SpCas9	DNA-stable	≥4	No detailed position of mismatch/es proximal to the PAM																											No	0.35
150	6	10.1111/pbi.13020	CRISPR/SpCas9	DNA-stable	≥4	No detailed position of mismatch/es proximal to the PAM																											No	0.35
150	6	10.1111/pbi.13020	CRISPR/SpCas9	DNA-stable	≥4	No detailed position of mismatch/es proximal to the PAM																											No	0.35
150	6	10.1111/pbi.13020	CRISPR/SpCas9	DNA-stable	≥4	No detailed position of mismatch/es proximal to the PAM																											No	0.35
150	6	10.1111/pbi.13020	CRISPR/SpCas9	DNA-stable	≥4	No detailed position of mismatch/es proximal to the PAM																											No	0.35
150	6	10.1111/pbi.13020	CRISPR/SpCas9	DNA-stable	≥4	No detailed position of mismatch/es proximal to the PAM																											No	0.35
150	6	10.1111/pbi.13020	CRISPR/SpCas9	DNA-stable	≥4	No detailed position of mismatch/es proximal to the PAM																											No	0.35
150	6	10.1111/pbi.13020	CRISPR/SpCas9	DNA-stable	≥4	No detailed position of mismatch/es proximal to the PAM																											No	0.35
150	6	10.1111/pbi.13020	CRISPR/SpCas9	DNA-stable	≥4	No detailed position of mismatch/es proximal to the PAM																											No	0.35
150	6	10.1111/pbi.13020	CRISPR/SpCas9	DNA-stable	≥4	No detailed position of mismatch/es proximal to the PAM																											No	0.35
150	6	10.1111/pbi.13020	CRISPR/SpCas9	DNA-stable	≥4	No detailed position of mismatch/es proximal to the PAM																											No	0.35
150	6	10.1111/pbi.13020	CRISPR/SpCas9	DNA-stable	≥4	No detailed position of mismatch/es proximal to the PAM																											No	0.35
150	6	10.1111/pbi.13020	CRISPR/SpCas9	DNA-stable	≥4	No detailed position of mismatch/es proximal to the PAM																											No	0.35
150	6	10.1111/pbi.13020	CRISPR/SpCas9	DNA-stable	≥4	No detailed position of mismatch/es proximal to the PAM																											No	0.35
150	6	10.1111/pbi.13020	CRISPR/SpCas9	DNA-stable	≥4	No detailed position of mismatch/es proximal to the PAM																											No	0.35
150	6	10.1111/pbi.13020	CRISPR/SpCas9	DNA-stable	≥4	No detailed position of mismatch/es proximal to the PAM																											No	0.35
150	6	10.1111/pbi.13020	CRISPR/SpCas9	DNA-stable	≥4	No detailed position of mismatch/es proximal to the PAM																											No	0.35
150	6	10.1111/pbi.13020	CRISPR/SpCas9	DNA-stable	≥4	No detailed position of mismatch/es proximal to the PAM																											No	0.35
150	6	10.1111/pbi.13020	CRISPR/SpCas9	DNA-stable	≥4	No detailed position of mismatch/es proximal to the PAM																											No	0.35
150	6	10.1111/pbi.13020	CRISPR/SpCas9	DNA-stable	≥4	No detailed position of mismatch/es proximal to the PAM																											No	0.35
150	6	10.1111/pbi.13020	CRISPR/SpCas9	DNA-stable	≥4	No detailed position of mismatch/es proximal to the PAM																											No	0.35
150	6	10.1111/pbi.13020	CRISPR/SpCas9	DNA-stable	≥4	No detailed position of mismatch/es proximal to the PAM																											No	0.35
150	6	10.1111/pbi.13020	CRISPR/SpCas9	DNA-stable	≥4	No detailed position of mismatch/es proximal to the PAM																											No	0.35
150	6	10.1111/pbi.13020	CRISPR/SpCas9	DNA-stable	≥4	No detailed position of mismatch/es proximal to the PAM																											No	0.35
150	6	10.1111/pbi.13020	CRISPR/SpCas9	DNA-stable	≥4	No detailed position of mismatch/es proximal to the PAM																											No	0.35
150	6	10.1111/pbi.13020	CRISPR/SpCas9	DNA-stable	≥4	No detailed position of mismatch/es proximal to the PAM																											No	0.35
150	6	10.1111/pbi.13020	CRISPR/SpCas9	DNA-stable	≥4	No detailed position of mismatch/es proximal to the PAM																											No	0.35
150	6	10.1111/pbi.13020	CRISPR/SpCas9	DNA-stable	≥4	No detailed position of mismatch/es proximal to the PAM																											No	0.35
150	6	10.1111/pbi.13020	CRISPR/SpCas9	DNA-stable	≥4	No detailed position of mismatch/es proximal to the PAM																											No	0.35
150	6	10.1111/pbi.13020	CRISPR/SpCas9	DNA-stable	≥4	No detailed position of mismatch/es proximal to the PAM																											No	0.35
150	6	10.1111/pbi.13020	CRISPR/SpCas9	DNA-stable	≥4	No detailed position of mismatch/es proximal to the PAM																											No	0.35
150	6	10.1111/pbi.13020	CRISPR/SpCas9	DNA-stable	≥4	No detailed position of mismatch/es proximal to the PAM																											No	0.35
150	6	10.1111/pbi.13020	CRISPR/SpCas9	DNA-stable	≥4	No detailed position of mismatch/es proximal to the PAM																											No	0.35
150	6	10.1111/pbi.13020	CRISPR/SpCas9	DNA-stable	≥4	No detailed position of mismatch/es proximal to the PAM																											No	0.35
150	6	10.1111/pbi.13020	CRISPR/SpCas9	DNA-stable	≥4	No detailed position of mismatch/es proximal to the PAM																											No	0.35
150	6	10.1111/pbi.13020	CRISPR/SpCas9	DNA-stable	≥4	No detailed position of mismatch/es proximal to the PAM																											No	0.35
150	6	10.1111/pbi.13020	CRISPR/SpCas9	DNA-stable	≥4	No detailed position of mismatch/es proximal to the PAM																											No	0.35
150	6	10.1111/pbi.13020	CRISPR/SpCas9	DNA-stable	≥4	No detailed position of mismatch/es proximal to the PAM																											No	0.35
150	6	10.1111/pbi.13020	CRISPR/SpCas9	DNA-stable	≥4	No detailed position of mismatch/es proximal to the PAM																											No	0.35
150	6	10.1111/pbi.13020	CRISPR/SpCas9	DNA-stable	≥4	No detailed position of mismatch/es proximal to the PAM																											No	0.35
150	6	10.1111/pbi.13020	CRISPR/SpCas9	DNA-stable	≥4	No detailed position of mismatch/es proximal to the PAM																											No	0.35
150	6	10.1111/pbi.13020	CRISPR/SpCas9	DNA-stable	≥4	No detailed position of mismatch/es proximal to the PAM																											No	0.35
150	6	10.1111/pbi.13020	CRISPR/SpCas9	DNA-stable	≥4	No detailed position of mismatch/es proximal to the PAM																											No	0.35
150	6	10.1111/pbi.13020	CRISPR/SpCas9	DNA-stable	≥4	No detailed position of mismatch/es proximal to the PAM																											No	0.35
150	6	10.1111/pbi.13020	CRISPR/SpCas9	DNA-stable	≥4	No detailed position of mismatch/es proximal to the PAM																											No	0.35
150	6	10.1111/pbi.13020	CRISPR/SpCas9	DNA-stable	≥4	No detailed position of mismatch/es proximal to the PAM																											No	0.35
150	6	10.1111/pbi.13020	CRISPR/SpCas9	DNA-stable	≥4	No detailed position of mismatch/es proximal to the PAM																											No	0.35
150	6	10.1111/pbi.13020	CRISPR/SpCas9	DNA-stable	≥4	No detailed position of mismatch/es proximal to the PAM																											No	0.35
150	6	10.1111/pbi.13020	CRISPR/SpCas9	DNA-stable	≥4	No detailed position of mismatch/es proximal to the PAM																											No	0.35
150	6	10.1111/pbi.13020	CRISPR/SpCas9	DNA-stable	≥4	No detailed position of mismatch/es proximal to the PAM																											No	0.35
150	6	10.1111/pbi.13020	CRISPR/SpCas9	DNA-stable	≥4	No detailed position of mismatch/es proximal to the PAM																											No	0.35
150	6	10.1111/pbi.13020	CRISPR/SpCas9	DNA-stable	≥4	No detailed position of mismatch/es proximal to the PAM																											No	0.35
150	6	10.1111/pbi.13020	CRISPR/SpCas9	DNA-stable	≥4	No detailed position of mismatch/es proximal to the PAM																											No	0.35
150	6	10.1111/pbi.13020	CRISPR/SpCas9	DNA-stable	≥4	No detailed position of mismatch/es proximal to the PAM																											No	0.35
150	6	10.1111/pbi.13020	CRISPR/SpCas9	DNA-stable	≥4	No detailed position of mismatch/es proximal to the PAM																											No	0.35
150	6	10.1111/pbi.13020	CRISPR/SpCas9	DNA-stable	≥4	No detailed position of mismatch/es proximal to the PAM																											No	0.35
150	6	10.1111/pbi.13020	CRISPR/SpCas9	DNA-stable	≥4	No detailed position of mismatch/es proximal to the PAM																											No	0.35
150	6	10.1111/pbi.13020	CRISPR/SpCas9	DNA-stable	≥4	No detailed position of mismatch/es proximal to the PAM																											No	0.35
150	6	10.1111/pbi.13020	CRISPR/SpCas9	DNA-stable	≥4	No detailed position of mismatch/es proximal to the PAM																											No	0.35
150	6	10.1111/pbi.13020	CRISPR/SpCas9	DNA-stable	≥4	No detailed position of mismatch/es proximal to the PAM																											No	0.35
150	6	10.1111/pbi.13020	CRISPR/SpCas9	DNA-stable	≥4	No detailed position of mismatch/es proximal to the PAM																											No	0.35
150	6	10.1111/pbi.13020	CRISPR/SpCas9	DNA-stable	≥4	No detailed position of mismatch/es proximal to the PAM																											No	0.35
150	6	10.1111/pbi.13020	CRISPR/SpCas9	DNA-stable	≥4	No detailed position of mismatch/es proximal to the PAM																											No	0.35
150	6	10.1111/pbi.13020	CRISPR/SpCas9	DNA-stable	≥4	No detailed position of mismatch/es proximal to the PAM																											No	0.35
150	6	10.1111/pbi.13020	CRISPR/SpCas9	DNA-stable	≥4	No detailed position of mismatch/es proximal to the PAM																											No	0.35
150	6	10.1111/pbi.13020	CRISPR/SpCas9	DNA-stable	≥4	No detailed position of mismatch/es proximal to the PAM																											No	0.35
150	6	10.1111/pbi.13020	CRISPR/SpCas9	DNA-stable	≥4	No detailed position of mismatch/es proximal to the PAM																											No	0.35
150	6	10.1111/pbi.13020	CRISPR/SpCas9	DNA-stable	≥4	No detailed position of mismatch/es proximal to the PAM																											No	0.35
150	6	10.1111/pbi.13020	CRISPR/SpCas9	DNA-stable	≥4	No detailed position of mismatch/es proximal to the PAM																											No	0.35
150	6	10.1111/pbi.13020	CRISPR/SpCas9	DNA-stable	≥4	No detailed position of mismatch/es proximal to the PAM																											No	0.35
150	6	10.1111/pbi.13020	CRISPR/SpCas9	DNA-stable	≥4	No detailed position of mismatch/es proximal to the PAM																											No	0.35
150	6	10.1111/pbi.13020	CRISPR/SpCas9	DNA-stable	≥4	No detailed position of mismatch/es proximal to the PAM																											No	0.35
150	6	10.1111/pbi.13020	CRISPR/SpCas9	DNA-stable	≥4	No detailed position of mismatch/es proximal to the PAM																											No	0.35
150	6	10.1111/pbi.13020	CRISPR/SpCas9	DNA-stable	≥4	No detailed position of mismatch/es proximal to the PAM																											No	0.35
150	6	10.1111/pbi.13020	CRISPR/SpCas9	DNA-stable	≥4	No detailed position of mismatch/es proximal to the PAM																											No	0.35
150	6	10.1111/pbi.13020	CRISPR/SpCas9	DNA-stable	≥4	No detailed position of mismatch/es proximal to the PAM																											No	0.35
150	6	10.1111/pbi.13020	CRISPR/SpCas9	DNA-stable	≥4	No detailed position of mismatch/es proximal to the PAM																											No	0.35
150	6	10.1111/pbi.13020	CRISPR/SpCas9	DNA-stable	≥4	No detailed position of mismatch/es proximal to the PAM																											No	0.35
150	6	10.1111/pbi.13020	CRISPR/SpCas9	DNA-stable	≥4	No detailed position of mismatch/es proximal to the PAM																											No	0.35
150	6	10.1111/pbi.13020	CRISPR/SpCas9	DNA-stable	≥4	No detailed position of mismatch/es proximal to the PAM																											No	0.35
150	6	10.1111/pbi.13020	CRISPR/SpCas9	DNA-stable	≥4	No detailed position of mismatch/es proximal to the PAM																											No	0.35
150	6	10.1111/pbi.13020	CRISPR/SpCas9	DNA-stable	≥4	No detailed position of mismatch/es proximal to the PAM																											No	0.35
150	6	10.1111/pbi.13020	CRISPR/SpCas9	DNA-stable	≥4	No detailed position of mismatch/es proximal to the PAM																											No	0.35
150	6	10.1111/pbi.13020	CRISPR/SpCas9	DNA-stable	≥4	No detailed position of mismatch/es proximal to the PAM																											No	0.35
150	6	10.1111/pbi.13020	CRISPR/SpCas9	DNA-stable	≥4	No detailed position of mismatch/es proximal to the PAM																											No	0.35
150	6	10.1111/pbi.13020	CRISPR/SpCas9	DNA-stable	≥4	No detailed position of mismatch/es proximal to the PAM																											No	0.35
150	6	10.1111/pbi.13020	CRISPR/SpCas9	DNA-stable	≥4	No detailed position of mismatch/es proximal to the PAM																											No	0.35
150	6	10.1111/pbi.13020	CRISPR/SpCas9	DNA-stable	≥4	No detailed position of mismatch/es proximal to the PAM																											No	0.35
150	6	10.1111/pbi.13020	CRISPR/SpCas9	DNA-stable	≥4	No detailed position of mismatch/es proximal to the PAM																											No	0.35
150	6	10.1111/pbi.13020	CRISPR/SpCas9	DNA-stable	≥4	No detailed position of mismatch/es proximal to the PAM																											No	0.35
150	6	10.1111/pbi.13020	CRISPR/SpCas9	DNA-stable	≥4	No detailed position of mismatch/es proximal to the PAM																											No	0.35
150	6	10.1111/pbi.13020	CRISPR/SpCas9	DNA-stable	≥4	No detailed position of mismatch/es proximal to the PAM																											No	0.35
150	6	10.1111/pbi.13020	CRISPR/SpCas9	DNA-stable	≥4	No detailed position of mismatch/es proximal to the PAM																											No	0.35
150	6	10.1111/pbi.13020	CRISPR/SpCas9	DNA-stable	≥4	No detailed position of mismatch/es proximal to the PAM																											No	0.35
150	6	10.1111/pbi.13020	CRISPR/SpCas9	DNA-stable	≥4	No detailed position of mismatch/es proximal to the PAM																											No	0.35
150	6	10.1111/pbi.13020	CRISPR/SpCas9	DNA-stable	≥4	No detailed position of mismatch/es proximal to the PAM																											No	0.35
150	6	10.1111/pbi.13020	CRISPR/SpCas9	DNA-stable	≥4	No detailed position of mismatch/es proximal to the PAM																											No	0.35
150	6	10.1111/pbi.13020	CRISPR/SpCas9	DNA-stable	≥4	No detailed position of mismatch/es proximal to the PAM																											No	0.35
150	6	10.1111/pbi.13020	CRISPR/SpCas9	DNA-stable	≥4	No detailed position of mismatch/es proximal to the PAM																											No	0.35
150	6	10.1111/pbi.13020	CRISPR/SpCas9	DNA-stable	≥4	No detailed position of mismatch/es proximal to the PAM																											No	0.35
150	6	10.1111/pbi.13020	CRISPR/SpCas9	DNA-stable	≥4	No detailed position of mismatch/es proximal to the PAM																											No	0.35
150	6	10.1111/pbi.13020	CRISPR/SpCas9	DNA-stable	≥4	No detailed position of mismatch/es proximal to the PAM																											No	0.35
150	6	10.1111/pbi.13020	CRISPR/SpCas9	DNA-stable	≥4	No detailed position of mismatch/es proximal to the PAM																											No	0.35
150	6	10.1111/pbi.13020	CRISPR/SpCas9	DNA-stable	≥4	No detailed position of mismatch/es proximal to the PAM																											No	0.35
150	6	10.1111/pbi.13020	CRISPR/SpCas9	DNA-stable	≥4	No detailed position of mismatch/es proximal to the PAM																											No	0.35
150	6	10.1111/pbi.13020	CRISPR/SpCas9	DNA-stable	≥4	No detailed position of mismatch/es proximal to the PAM																											No	0.35
150	6	10.1111/pbi.13020	CRISPR/SpCas9	DNA-stable	≥4	No detailed position of mismatch/es proximal to the PAM																											No	0.35
150	6	10.1111/pbi.13020	CRISPR/SpCas9	DNA-stable	≥4	No detailed position of mismatch/es proximal to the PAM																											No	0.35
150	6	10.1111/pbi.13020	CRISPR/SpCas9	DNA-stable	≥4	No detailed position of mismatch/es proximal to the PAM																											No	0.35
150	6	10.1111/pbi.13020	CRISPR/SpCas9	DNA-stable	≥4	No detailed position of mismatch/es proximal to the PAM																											No	0.35
150	6	10.1111/pbi.13020	CRISPR/SpCas9	DNA-stable	≥4	No detailed position of mismatch/es proximal to the PAM																											No	0.35
150	6	10.1111/pbi.13020	CRISPR/SpCas9	DNA-stable	≥4	No detailed position of mismatch/es proximal to the PAM																											No	0.35
150	6	10.1111/pbi.13020	CRISPR/SpCas9	DNA-stable	≥4	No detailed position of mismatch/es proximal to the PAM																											No	0.35
150	6	10.1111/pbi.13020	CRISPR/SpCas9	DNA-stable	≥4	No detailed position of mismatch/es proximal to the PAM																											No	0.35
150	6	10.1111/pbi.13020	CRISPR/SpCas9	DNA-stable	≥4	No detailed position of mismatch/es proximal to the PAM																											No	0.35
150	6	10.1111/pbi.13020	CRISPR/SpCas9	DNA-stable	≥4	No detailed position of mismatch/es proximal to the PAM																											No	0.35
150	6	10.1111/pbi.13020	CRISPR/SpCas9	DNA-stable	≥4	No detailed position of mismatch/es proximal to the PAM																											No	0.35
150	6	10.1111/pbi.13020	CRISPR/SpCas9	DNA-stable	≥4	No detailed position of mismatch/es proximal to the PAM																											No	0.35
150	6	10.1111/pbi.13020	CRISPR/SpCas9	DNA-stable	≥4	No detailed position of mismatch/es proximal to the PAM																											No	0.35
150	6	10.1111/pbi.13020	CRISPR/SpCas9	DNA-stable	≥4	No detailed position of mismatch/es proximal to the PAM																											No	0.35
150	6	10.1111/pbi.13020	CRISPR/SpCas9	DNA-stable	≥4	No detailed position of mismatch/es proximal to the PAM																											No	0.35
150	6	10.1111/pbi.13020	CRISPR/SpCas9	DNA-stable	≥4	No detailed position of mismatch/es proximal to the PAM																											No	0.35
150	6	10.1111/pbi.13020	CRISPR/SpCas9	DNA-stable	≥4	No detailed position of mismatch/es proximal to the PAM																											No	0.35
150	6	10.1111/pbi.13020	CRISPR/SpCas9	DNA-stable	≥4	No detailed position of mismatch/es proximal to the PAM																											No	0.35
150	6	10.1111/pbi.13020	CRISPR/SpCas9	DNA-stable	≥4	No detailed position of mismatch/es proximal to the PAM																											No	0.35
150	6	10.1111/pbi.13020	CRISPR/SpCas9	DNA-stable	≥4	No detailed position of mismatch/es proximal to the PAM																											No	0.35
150	6	10.1111/pbi.13020	CRISPR/SpCas9	DNA-stable	≥4	No detailed position of mismatch/es proximal to the PAM																											No	0.35
150	6	10.1111/pbi.13020	CRISPR/SpCas9	DNA-stable	≥4	No detailed position of mismatch/es proximal to the PAM																											No	0.35
150	6	10.1111/pbi.13020	CRISPR/SpCas9	DNA-stable	≥4	No detailed position of mismatch/es proximal to the PAM																											No	0.35
150	6	10.1111/pbi.13020	CRISPR/SpCas9	DNA-stable	≥4	No detailed position of mismatch/es proximal to the PAM																											No	0.35
150	6	10.1111/pbi.13020	CRISPR/SpCas9	DNA-stable	≥4	No detailed position of mismatch/es proximal to the PAM																											No	0.35
150	6	10.1111/pbi.13020	CRISPR/SpCas9	DNA-stable	≥4	No detailed position of mismatch/es proximal to the PAM																											No	0.35
150	6	10.1111/pbi.13020	CRISPR/SpCas9	DNA-stable	≥4	No detailed position of mismatch/es proximal to the PAM																											No	0.35
150	6	10.1111/pbi.13020	CRISPR/SpCas9	DNA-stable	≥4	No detailed position of mismatch/es proximal to the PAM																											No	0.35
150	6	10.1111/pbi.13020	CRISPR/SpCas9	DNA-stable	≥4	No detailed position of mismatch/es proximal to the PAM																											No	0.35
150	6	10.1111/pbi.13020	CRISPR/SpCas9	DNA-stable	≥4	No detailed position of mismatch/es proximal to the PAM																											No	0.35
150	6	10.1111/pbi.13020	CRISPR/SpCas9	DNA-stable	≥4	No detailed position of mismatch/es proximal to the PAM																											No	0.35
150	6	10.1111/pbi.13020	CRISPR/SpCas9	DNA-stable	≥4	No detailed position of mismatch/es proximal to the PAM																											No	0.35
150	6	10.1111/pbi.13020	CRISPR/SpCas9	DNA-stable	≥4	No detailed position of mismatch/es proximal to the PAM																											No	0.35
150	6	10.1111/pbi.13020	CRISPR/SpCas9	DNA-stable	≥4	No detailed position of mismatch/es proximal to the PAM																											No	0.35
150	6	10.1111/pbi.13020	CRISPR/SpCas9	DNA-stable	≥4	No detailed position of mismatch/es proximal to the PAM																											No	0.35
150	6	10.1111/pbi.13020	CRISPR/SpCas9	DNA-stable	≥4	No detailed position of mismatch/es proximal to the PAM																											No	0.35
150	6	10.1111/pbi.13020	CRISPR/SpCas9	DNA-stable	≥4	No detailed position of mismatch/es proximal to the PAM																											No	0.35
150	6	10.1111/pbi.13020	CRISPR/SpCas9	DNA-stable	≥4	No detailed position of mismatch/es proximal to the PAM																											No	0.35
150	6	10.1111/pbi.13020	CRISPR/SpCas9	DNA-stable	≥4	No detailed position of mismatch/es proximal to the PAM																											No	0.35
150	6	10.1111/pbi.13020	CRISPR/SpCas9	DNA-stable	≥4	No detailed position of mismatch/es proximal to the PAM																											No	0.35
150	6	10.1111/pbi.13020	CRISPR/SpCas9	DNA-stable	≥4	No detailed position of mismatch/es proximal to the PAM																											No	0.35
150	6	10.1111/pbi.13020	CRISPR/SpCas9	DNA-stable	≥4	No detailed position of mismatch/es proximal to the PAM																											No	0.35
150	6	10.1111/pbi.13020	CRISPR/SpCas9	DNA-stable	≥4	No detailed position of mismatch/es proximal to the PAM																											No	0.35
150	6	10.1111/pbi.13020	CRISPR/SpCas9	DNA-stable	≥4	No detailed position of mismatch/es proximal to the PAM																											No	0.35
150	6	10.1111/pbi.13020	CRISPR/SpCas9	DNA-stable	≥4	No detailed position of mismatch/es proximal to the PAM																											No	0.35
150	6	10.1111/pbi.13020	CRISPR/SpCas9	DNA-stable	≥4	No detailed position of mismatch/es proximal to the PAM																											No	0.35
150	6	10.1111/pbi.13020	CRISPR/SpCas9	DNA-stable	≥4	No detailed position of mismatch/es proximal to the PAM																											No	0.35
150	6	10.1111/pbi.13020	CRISPR/SpCas9	DNA-stable	≥4	No detailed position of mismatch/es proximal to the PAM																											No	0.35
150	6	10.1111/pbi.13020	CRISPR/SpCas9	DNA-stable	≥4	No detailed position of mismatch/es proximal to the PAM																											No	0.35
150	6	10.1111/pbi.13020	CRISPR/SpCas9	DNA-stable	≥4	No detailed position of mismatch/es proximal to the PAM																											No	0.35
150	6	10.1111/pbi.13020	CRISPR/SpCas9	DNA-stable	≥4	No detailed position of mismatch/es proximal to the PAM																											No	0.35
150	6	10.1111/pbi.13020	CRISPR/SpCas9	DNA-stable	≥4	No detailed position of mismatch/es proximal to the PAM																											No	0.35
150	6	10.1111/pbi.13020	CRISPR/SpCas9	DNA-stable	≥4	No detailed position of mismatch/es proximal to the PAM																											No	0.35
150	6	10.1111/pbi.13020	CRISPR/SpCas9	DNA-stable	≥4	No detailed position of mismatch/es proximal to the PAM																											No	0.35
150	6	10.1111/pbi.13020	CRISPR/SpCas9	DNA-stable	≥4	No detailed position of mismatch/es proximal to the PAM																											No	0.35
150	6	10.1111/pbi.13020	CRISPR/SpCas9	DNA-stable	≥4	No detailed position of mismatch/es proximal to the PAM																											No	0.35
150	6	10.1111/pbi.13020	CRISPR/SpCas9	DNA-stable	≥4	No detailed position of mismatch/es proximal to the PAM																											No	0.35
150	6	10.1111/pbi.13020	CRISPR/SpCas9	DNA-stable	≥4	No detailed position of mismatch/es proximal to the PAM																											No	0.35
150	6	10.1111/pbi.13020	CRISPR/SpCas9	DNA-stable	≥4	No detailed position of mismatch/es proximal to the PAM																											No	0.35
150	6	10.1111/pbi.13020	CRISPR/SpCas9	DNA-stable	≥4	No detailed position of mismatch/es proximal to the PAM																											No	0.35
150	6	10.1111/pbi.13020	CRISPR/SpCas9	DNA-stable	≥4	No detailed position of mismatch/es proximal to the PAM																											No	0.35
150	6	10.1111/pbi.13020	CRISPR/SpCas9	DNA-stable	≥4	No detailed position of mismatch/es proximal to the PAM																											No	0.35
150	6	10.1111/pbi.13020	CRISPR/SpCas9	DNA-stable	≥4	No detailed position of mismatch/es proximal to the PAM																											No	0.35
150	6	10.1111/pbi.13020	CRISPR/SpCas9	DNA-stable	≥4	No detailed position of mismatch/es proximal to the PAM																											No	0.35
150	6	10.1111/pbi.13020	CRISPR/SpCas9	DNA-stable	≥4	No detailed position of mismatch/es proximal to the PAM																											No	0.35
150	6	10.1111/pbi.13020	CRISPR/SpCas9	DNA-stable	≥4	No detailed position of mismatch/es proximal to the PAM																											No	0.35
150	6	10.1111/pbi.13020	CRISPR/SpCas9	DNA-stable	≥4	No detailed position of mismatch/es proximal to the PAM																											No	0.35
150	6	10.1111/pbi.13020	CRISPR/SpCas9	DNA-stable	≥4	No detailed position of mismatch/es proximal to the PAM																											No	0.35
150	6	10.1111/pbi.13020	CRISPR/SpCas9	DNA-stable	≥4	No detailed position of mismatch/es proximal to the PAM																											No	0.35
150	6	10.1111/pbi.13020	CRISPR/SpCas9	DNA-stable	≥4	No detailed position of mismatch/es proximal to the PAM																											No	0.35
150	6	10.1111/pbi.13020	CRISPR/SpCas9	DNA-stable	≥4	No detailed position of mismatch/es proximal to the PAM																											No	0.35
150	6	10.1111/pbi.13020	CRISPR/SpCas9	DNA-stable	≥4	No detailed position of mismatch/es proximal to the PAM																											No	0.35
150	6	10.1111/pbi.13020	CRISPR/SpCas9	DNA-stable	≥4	No detailed position of mismatch/es proximal to the PAM																											No	0.35
150	6	10.1111/pbi.13020	CRISPR/SpCas9	DNA-stable	≥4	No detailed position of mismatch/es proximal to the PAM																											No	0.35
150	6	10.1111/pbi.13020	CRISPR/SpCas9	DNA-stable	≥4	No detailed position of mismatch/es proximal to the PAM																											No	0.35
150	6	10.1111/pbi.13020	CRISPR/SpCas9	DNA-stable	≥4	No detailed position of mismatch/es proximal to the PAM																											No	0.35
150	6	10.1111/pbi.13020	CRISPR/SpCas9	DNA-stable	≥4	No detailed position of mismatch/es proximal to the PAM																											No	0.35
150	6	10.1111/pbi.13020	CRISPR/SpCas9	DNA-stable	≥4	No detailed position of mismatch/es proximal to the PAM																											No	0.35
150	6	10.1111/pbi.13020	CRISPR/SpCas9	DNA-stable	≥4	No detailed position of mismatch/es proximal to the PAM																											No	0.35
150	6	10.1111/pbi.13020	CRISPR/SpCas9	DNA-stable	≥4	No detailed position of mismatch/es proximal to the PAM																											No	0.35
150	6	10.1111/pbi.13020	CRISPR/SpCas9	DNA-stable	≥4	No detailed position of mismatch/es proximal to the PAM																											No	0.35
150	6	10.1111/pbi.13020	CRISPR/SpCas9	DNA-stable	≥4	No detailed position of mismatch/es proximal to the PAM																											No	0.35
150	6	10.1111/pbi.13020	CRISPR/SpCas9	DNA-stable	≥4	No detailed position of mismatch/es proximal to the PAM																											No	0.35
150	6	10.1111/pbi.13020	CRISPR/SpCas9	DNA-stable	≥4	No detailed position of mismatch/es proximal to the PAM																											No	0.35
150	6	10.1111/pbi.13020	CRISPR/SpCas9	DNA-stable	≥4	No detailed position of mismatch/es proximal to the PAM																											No	0.35
150	6	10.1111/pbi.13020	CRISPR/SpCas9	DNA-stable	≥4	No detailed position of mismatch/es proximal to the PAM																											No	0.35
150	6	10.1111/pbi.13020	CRISPR/SpCas9	DNA-stable	≥4	No detailed position of mismatch/es proximal to the PAM																											No	0.35
150	6	10.1111/pbi.13020	CRISPR/SpCas9	DNA-stable	≥4	No detailed position of mismatch/es proximal to the PAM																											No	0.35
150	6	10.1111/pbi.13020	CRISPR/SpCas9	DNA-stable	≥4	No detailed position of mismatch/es proximal to the PAM																											No	0.35
150	6	10.1111/pbi.13020	CRISPR/SpCas9	DNA-stable	≥4	No detailed position of mismatch/es proximal to the PAM																											No	0.35
150	6	10.1111/pbi.13020	CRISPR/SpCas9	DNA-stable	≥4	No detailed position of mismatch/es proximal to the PAM																											No	0.35
150	6	10.1111/pbi.13020	CRISPR/SpCas9	DNA-stable	≥4	No detailed position of mismatch/es proximal to the PAM																											No	0.35
150	6	10.1111/pbi.13020	CRISPR/SpCas9	DNA-stable	≥4	No detailed position of mismatch/es proximal to the PAM																											No	0.35
150	6	10.1111/pbi.13020	CRISPR/SpCas9	DNA-stable	≥4	No detailed position of mismatch/es proximal to the PAM																											No	0.35
150	6	10.1111/pbi.13020	CRISPR/SpCas9	DNA-stable	≥4	No detailed position of mismatch/es proximal to the PAM																											No	0.35
150	6	10.1111/pbi.13020	CRISPR/SpCas9	DNA-stable	≥4	No detailed position of mismatch/es proximal to the PAM																											No	0.35
150	6	10.1111/pbi.13020	CRISPR/SpCas9	DNA-stable	≥4	No detailed position of mismatch/es proximal to the PAM																											No	0.35
150	6	10.1111/pbi.13020	CRISPR/SpCas9	DNA-stable	≥4	No detailed position of mismatch/es proximal to the PAM																											No	0.35
150	6	10.1111/pbi.13020	CRISPR/SpCas9	DNA-stable	≥4	No detailed position of mismatch/es proximal to the PAM																											No	0.35
150	6	10.1111/pbi.13020	CRISPR/SpCas9	DNA-stable	≥4	No detailed position of mismatch/es proximal to the PAM																											No	0.35
150	6	10.1111/pbi.13020	CRISPR/SpCas9	DNA-stable	≥4	No detailed position of mismatch/es proximal to the PAM																											No	0.35
150	6	10.1111/pbi.13020	CRISPR/SpCas9	DNA-stable	≥4	No detailed position of mismatch/es proximal to the PAM																											No	0.35
150	6	10.1111/pbi.13020	CRISPR/SpCas9	DNA-stable	≥4	No detailed position of mismatch/es proximal to the PAM																											No	0.35
150	6	10.1111/pbi.13020	CRISPR/SpCas9	DNA-stable	≥4	No detailed position of mismatch/es proximal to the PAM																											No	0.35
150	6	10.1111/pbi.13020	CRISPR/SpCas9	DNA-stable	≥4	No detailed position of mismatch/es proximal to the PAM																											No	0.35
150	6	10.1111/pbi.13020	CRISPR/SpCas9	DNA-stable	≥4	No detailed position of mismatch/es proximal to the PAM																											No	0.35
150	6	10.1111/pbi.13020	CRISPR/SpCas9	DNA-stable	≥4	No detailed position of mismatch/es proximal to the PAM																											No	0.35
150	6	10.1111/pbi.13020	CRISPR/SpCas9	DNA-stable	≥4	No detailed position of mismatch/es proximal to the PAM																											No	0.35
150	6	10.1111/pbi.13020	CRISPR/SpCas9	DNA-stable	≥4	No detailed position of mismatch/es proximal to the PAM																											No	0.35
150	6	10.1111/pbi.13020	CRISPR/SpCas9	DNA-stable	≥4	No detailed position of mismatch/es proximal to the PAM																											No	0.35
150	6	10.1111/pbi.13020	CRISPR/SpCas9	DNA-stable	≥4	No detailed position of mismatch/es proximal to the PAM																											No	0.35
150	6	10.1111/pbi.13020	CRISPR/SpCas9	DNA-stable	≥4	No detailed position of mismatch/es proximal to the PAM																											No	0.35
150	6	10.1111/pbi.13020	CRISPR/SpCas9	DNA-stable	≥4	No detailed position of mismatch/es proximal to the PAM																											No	0.35
150	6	10.1111/pbi.13020	CRISPR/SpCas9	DNA-stable	≥4	No detailed position of mismatch/es proximal to the PAM																											No	0.35
150	6	10.1111/pbi.13020	CRISPR/SpCas9	DNA-stable	≥4	No detailed position of mismatch/es proximal to the PAM																											No	0.35
150	6	10.1111/pbi.13020	CRISPR/SpCas9	DNA-stable	≥4	No detailed position of mismatch/es proximal to the PAM																											No	0.35
150	6	10.1111/pbi.13020	CRISPR/SpCas9	DNA-stable	≥4	No detailed position of mismatch/es proximal to the PAM																											No	0.35
150	6	10.1111/pbi.13020	CRISPR/SpCas9	DNA-stable	≥4	No detailed position of mismatch/es proximal to the PAM																											No	0.35
150	6	10.1111/pbi.13020	CRISPR/SpCas9	DNA-stable	≥4	No detailed position of mismatch/es proximal to the PAM																											No	0.35
150	6	10.1111/pbi.13020	CRISPR/SpCas9	DNA-stable	≥4	No detailed position of mismatch/es proximal to the PAM																											No	0.35
150	6	10.1111/pbi.13020	CRISPR/SpCas9	DNA-stable	≥4	No detailed position of mismatch/es proximal to the PAM																											No	0.35
150	6	10.1111/pbi.13020	CRISPR/SpCas9	DNA-stable	≥4	No detailed position of mismatch/es proximal to the PAM																											No	0.35
150	6	10.1111/pbi.13020	CRISPR/SpCas9	DNA-stable	≥4	No detailed position of mismatch/es proximal to the PAM																											No	0.35
150	6	10.1111/pbi.13020	CRISPR/SpCas9	DNA-stable	≥4	No detailed position of mismatch/es proximal to the PAM																											No	0.35
150	6	10.1111/pbi.13020	CRISPR/SpCas9	DNA-stable	≥4	No detailed position of mismatch/es proximal to the PAM																											No	0.35
150	6	10.1111/pbi.13020	CRISPR/SpCas9	DNA-stable	≥4	No detailed position of mismatch/es proximal to the PAM																											No	0.35
150	6	10.1111/pbi.13020	CRISPR/SpCas9	DNA-stable	≥4	No detailed position of mismatch/es proximal to the PAM																											No	0.35
150	6	10.1111/pbi.13020	CRISPR/SpCas9	DNA-stable	≥4	No detailed position of mismatch/es proximal to the PAM																											No	0.35
150	6	10.1111/pbi.13020	CRISPR/SpCas9	DNA-stable	≥4	No detailed position of mismatch/es proximal to the PAM																											No	0.35
150	6	10.1111/pbi.13020	CRISPR/SpCas9	DNA-stable	≥4	No detailed position of mismatch/es proximal to the PAM																											No	0.35
150	6	10.1111/pbi.13020	CRISPR/SpCas9	DNA-stable	≥4	No detailed position of mismatch/es proximal to the PAM																											No	0.35
150	6	10.1111/pbi.13020	CRISPR/SpCas9	DNA-stable	≥4	No detailed position of mismatch/es proximal to the PAM																											No	0.35
150	6	10.1111/pbi.13020	CRISPR/SpCas9	DNA-stable	≥4	No detailed position of mismatch/es proximal to the PAM																											No	0.35
150	6	10.1111/pbi.13020	CRISPR/SpCas9	DNA-stable	≥4	No detailed position of mismatch/es proximal to the PAM																											No	0.35
150	6	10.1111/pbi.13020	CRISPR/SpCas9	DNA-stable	≥4	No detailed position of mismatch/es proximal to the PAM																											No	0.35
150	6	10.1111/pbi.13020	CRISPR/SpCas9	DNA-stable	≥4	No detailed position of mismatch/es proximal to the PAM																											No	0.35
150	6	10.1111/pbi.13020	CRISPR/SpCas9	DNA-stable	≥4	No detailed position of mismatch/es proximal to the PAM																											No	0.35
150	6	10.1111/pbi.13020	CRISPR/SpCas9	DNA-stable	≥4	No detailed position of mismatch/es proximal to the PAM																											No	0.35
150	6	10.1111/pbi.13020	CRISPR/SpCas9	DNA-stable	≥4	No detailed position of mismatch/es proximal to the PAM																											No	0.35
150	6	10.1111/pbi.13020	CRISPR/SpCas9	DNA-stable	≥4	No detailed position of mismatch/es proximal to the PAM																											No	0.35
150	6	10.1111/pbi.13020	CRISPR/SpCas9	DNA-stable	≥4	No detailed position of mismatch/es proximal to the PAM																											No	0.35
150	6	10.1111/pbi.13020	CRISPR/SpCas9	DNA-stable	≥4	No detailed position of mismatch/es proximal to the PAM																											No	0.35
150	6	10.1111/pbi.13020	CRISPR/SpCas9	DNA-stable	≥4	No detailed position of mismatch/es proximal to the PAM																											No	0.35
150	6	10.1111/pbi.13020	CRISPR/SpCas9	DNA-stable	≥4	No detailed position of mismatch/es proximal to the PAM																											No	0.35
150	6	10.1111/pbi.13020	CRISPR/SpCas9	DNA-stable	≥4	No detailed position of mismatch/es proximal to the PAM																											No	0.35
150	6	10.1111/pbi.13020	CRISPR/SpCas9	DNA-stable	≥4	No detailed position of mismatch/es proximal to the PAM																											No	0.35
150	6	10.1111/pbi.13020	CRISPR/SpCas9	DNA-stable	≥4	No detailed position of mismatch/es proximal to the PAM																											No	0.35
150	6	10.1111/pbi.13020	CRISPR/SpCas9	DNA-stable	≥4	No detailed position of mismatch/es proximal to the PAM																											No	0.35
150	6	10.1111/pbi.13020	CRISPR/SpCas9	DNA-stable	≥4	No detailed position of mismatch/es proximal to the PAM																											No	0.35
150	6	10.1111/pbi.13020	CRISPR/SpCas9	DNA-stable	≥4	No detailed position of mismatch/es proximal to the PAM																											No	0.35
150	6	10.1111/pbi.13020	CRISPR/SpCas9	DNA-stable	≥4	No detailed position of mismatch/es proximal to the PAM																											No	0.35
150	6	10.1111/pbi.13020	CRISPR/SpCas9	DNA-stable	≥4	No detailed position of mismatch/es proximal to the PAM																											No	0.35
150	6	10.1111/pbi.13020	CRISPR/SpCas9	DNA-stable	≥4	No detailed position of mismatch/es proximal to the PAM																											No	0.35
150	6	10.1111/pbi.13020	CRISPR/SpCas9	DNA-stable	≥4	No detailed position of mismatch/es proximal to the PAM																											No	0.35
150	6	10.1111/pbi.13020	CRISPR/SpCas9	DNA-stable	≥4	No detailed position of mismatch/es proximal to the PAM																											No	0.35
150	6	10.1111/pbi.13020	CRISPR/SpCas9	DNA-stable	≥4	No detailed position of mismatch/es proximal to the PAM																											No	0.35
150	6	10.1111/pbi.13020	CRISPR/SpCas9	DNA-stable	≥4	No detailed position of mismatch/es proximal to the PAM																											No	0.35
150	6	10.1111/pbi.13020	CRISPR/SpCas9	DNA-stable	≥4	No detailed position of mismatch/es proximal to the PAM																											No	0.35
150	6	10.1111/pbi.13020	CRISPR/SpCas9	DNA-stable	≥4	No detailed position of mismatch/es proximal to the PAM																											No	0.35
150	6	10.1111/pbi.13020	CRISPR/SpCas9	DNA-stable	≥4	No detailed position of mismatch/es proximal to the PAM																											No	0.35
150	6	10.1111/pbi.13020	CRISPR/SpCas9	DNA-stable	≥4	No detailed position of mismatch/es proximal to the PAM																											No	0.35
150	6	10.1111/pbi.13020	CRISPR/SpCas9	DNA-stable	≥4	No detailed position of mismatch/es proximal to the PAM																											No	0.35
150	6	10.1111/pbi.13020	CRISPR/SpCas9	DNA-stable	≥4	No detailed position of mismatch/es proximal to the PAM																											No	0.35
150	6	10.1111/pbi.13020	CRISPR/SpCas9	DNA-stable	≥4	No detailed position of mismatch/es proximal to the PAM																											No	0.35
150	6	10.1111/pbi.13020	CRISPR/SpCas9	DNA-stable	≥4	No detailed position of mismatch/es proximal to the PAM																											No	0.35
150	6	10.1111/pbi.13020	CRISPR/SpCas9	DNA-stable	≥4	No detailed position of mismatch/es proximal to the PAM																											No	0.35
150	6	10.1111/pbi.13020	CRISPR/SpCas9	DNA-stable	≥4	No detailed position of mismatch/es proximal to the PAM																											No	0.35
150	6	10.1111/pbi.13020	CRISPR/SpCas9	DNA-stable	≥4	No detailed position of mismatch/es proximal to the PAM																											No	0.35
150	6	10.1111/pbi.13020	CRISPR/SpCas9	DNA-stable	≥4	No detailed position of mismatch/es proximal to the PAM																											No	0.35
150	6	10.1111/pbi.13020	CRISPR/SpCas9	DNA-stable	≥4	No detailed position of mismatch/es proximal to the PAM																											No	0.35
150	6	10.1111/pbi.13020	CRISPR/SpCas9	DNA-stable	≥4	No detailed position of mismatch/es proximal to the PAM																											No	0.35
150	6	10.1111/pbi.13020	CRISPR/SpCas9	DNA-stable	≥4	No detailed position of mismatch/es proximal to the PAM																											No	0.35
150	6	10.1111/pbi.13020	CRISPR/SpCas9	DNA-stable	≥4	No detailed position of mismatch/es proximal to the PAM																											No	0.35
150	6	10.1111/pbi.13020	CRISPR/SpCas9	DNA-stable	≥4	No detailed position of mismatch/es proximal to the PAM																											No	0.35
150	6	10.1111/pbi.13020	CRISPR/SpCas9	DNA-stable	≥4	No detailed position of mismatch/es proximal to the PAM																											No	0.35
150	6	10.1111/pbi.13020	CRISPR/SpCas9	DNA-stable	≥4	No detailed position of mismatch/es proximal to the PAM																											No	0.35
150	6	10.1111/pbi.13020	CRISPR/SpCas9	DNA-stable	≥4	No detailed position of mismatch/es proximal to the PAM																											No	0.35
150	6	10.1111/pbi.13020	CRISPR/SpCas9	DNA-stable	≥4	No detailed position of mismatch/es proximal to the PAM																											No	0.35
150	6	10.1111/pbi.13020	CRISPR/SpCas9	DNA-stable	≥4	No detailed position of mismatch/es proximal to the PAM																											No	0.35
150	6	10.1111/pbi.13020	CRISPR/SpCas9	DNA-stable	≥4	No detailed position of mismatch/es proximal to the PAM																											No	0.35
150	6	10.1111/pbi.13020	CRISPR/SpCas9	DNA-stable	≥4	No detailed position of mismatch/es proximal to the PAM																											No	0.35
150	6	10.1111/pbi.13020	CRISPR/SpCas9	DNA-stable	≥4	No detailed position of mismatch/es proximal to the PAM																											No	0.35
150	6	10.1111/pbi.13020	CRISPR/SpCas9	DNA-stable	≥4	No detailed position of mismatch/es proximal to the PAM																											No	0.35
150	6	10.1111/pbi.13020	CRISPR/SpCas9	DNA-stable	≥4	No detailed position of mismatch/es proximal to the PAM																											No	0.35
150	6	10.1111/pbi.13020	CRISPR/SpCas9	DNA-stable	≥4	No detailed position of mismatch/es proximal to the PAM																											No	0.35
150	6	10.1111/pbi.13020	CRISPR/SpCas9	DNA-stable	≥4	No detailed position of mismatch/es proximal to the PAM																											No	0.35
150	6	10.1111/pbi.13020	CRISPR/SpCas9	DNA-stable	≥4	No detailed position of mismatch/es proximal to the PAM																											No	0.35
150	6	10.1111/pbi.13020	CRISPR/SpCas9	DNA-stable	≥4	No detailed position of mismatch/es proximal to the PAM																											No	0.35
150	6	10.1111/pbi.13020	CRISPR/SpCas9	DNA-stable	≥4	No detailed position of mismatch/es proximal to the PAM																											No	0.35
150	6	10.1111/pbi.13020	CRISPR/SpCas9	DNA-stable	≥4	No detailed position of mismatch/es proximal to the PAM																											No	0.35
150	6	10.1111/pbi.13020	CRISPR/SpCas9	DNA-stable	≥4	No detailed position of mismatch/es proximal to the PAM																											No	0.35
150	6	10.1111/pbi.13020	CRISPR/SpCas9	DNA-stable	≥4	No detailed position of mismatch/es proximal to the PAM																											No	0.35
150	6	10.1111/pbi.13020	CRISPR/SpCas9	DNA-stable	≥4	No detailed position of mismatch/es proximal to the PAM																											No	0.35
150	6	10.1111/pbi.13020	CRISPR/SpCas9	DNA-stable	≥4	No detailed position of mismatch/es proximal to the PAM																											No	0.35
150	6	10.1111/pbi.13020	CRISPR/SpCas9	DNA-stable	≥4	No detailed position of mismatch/es proximal to the PAM																											No	0.35
150	6	10.1111/pbi.13020	CRISPR/SpCas9	DNA-stable	≥4	No detailed position of mismatch/es proximal to the PAM																											No	0.35
150	6	10.1111/pbi.13020	CRISPR/SpCas9	DNA-stable	≥4	No detailed position of mismatch/es proximal to the PAM																											No	0.35
150	6	10.1111/pbi.13020	CRISPR/SpCas9	DNA-stable	≥4	No detailed position of mismatch/es proximal to the PAM																											No	0.35
150	6	10.1111/pbi.13020	CRISPR/SpCas9	DNA-stable	≥4	No detailed position of mismatch/es proximal to the PAM																											No	0.35
150	6	10.1111/pbi.13020	CRISPR/SpCas9	DNA-stable	≥4	No detailed position of mismatch/es proximal to the PAM																											No	0.35
150	6	10.1111/pbi.13020	CRISPR/SpCas9	DNA-stable	≥4	No detailed position of mismatch/es proximal to the PAM																											No	0.35
150	6	10.1111/pbi.13020	CRISPR/SpCas9	DNA-stable	≥4	No detailed position of mismatch/es proximal to the PAM																											No	0.35
[truncated: 3,022 more rows]

## Sheet: Full_Model
Nominal Logistic Fit for Off-target identified: Full Model																																														Contingency Analysis of Most Likely Off-target identified By Off-target identified
																																Odds Ratios	For Off-target identified odds of Yes versus No
									Whole Model Test						Fit Details				Lack Of Fit					Parameter Estimates								Odds Ratios for GC-content							Confusion Matrix							Mosaic Plot
									Model	-LogLikelihood	DF	ChiSquare	Prob>ChiSq		Measure	Training	Definition		Source	DF	-LogLikelihood	ChiSquare		Term	Estimate	Std Error	ChiSquare	Prob>ChiSq	Lower 95%	Upper 95%		Level1	/Level2	Odds Ratio	Prob>Chisq	Lower 95%	Upper 95%		Actual	Predicted
									Difference	235.144	7	470.288	<.0001		Entropy RSquare	0.4619	1-Loglike(model)/Loglike(0)		Lack Of Fit	42	24.4512	48.9025		Intercept	-2.16211	0.19595	121.75	<.0001	-2.56433	-1.79191		High	Low	2.09313	0.0057	1.23925	3.53535			Count
									Full	273.92					Generalized RSquare	0.5525	(1-(L(0)/L(model))^(2/n))/(1-L(0)^(2/n))		Saturated	49	249.469	Prob>ChiSq		GC-content[Low]	-0.36933	0.133715	7.63	0.0057	-0.63853	-0.112881		Low	High	0.477754	0.0057	0.282857	0.806939		Off-target identified	Yes	No
									Reduced	509.064					Mean -Log p	0.1964	∑ -Log(ρ[j])/n		Fitted	7	273.92	0.2156		Number of mismatches[1]	2.42371	0.204152	140.95	<.0001	2.03541	2.83973									Yes	78	88
															RMSE	0.2413	√ ∑(y[j]-ρ[j])²/n							Number of mismatches[2]	1.14334	0.202388	31.91	<.0001	0.75429	1.55272		Odds Ratios for Number of mismatches							No	32	1197
															Mean Abs Dev	0.1178	∑ |y[j]-ρ[j]|/n							Number of mismatches[3]	-1.02393	0.270853	14.29	0.0002	-1.58628	-0.512041		Level1	/Level2	Odds Ratio	Prob>Chisq	Lower 95%	Upper 95%
									RSquare (U)	0.4619					Misclassification Rate	0.086	∑ (ρ[j]≠ρMax)/n							Mismatch/es within seed sequence[Yes]	-0.765869	0.116222	43.42	<.0001	-0.998636	-0.542022		2	1	0.277934	<.0001	0.166803	0.463105
									AICc	563.944					N	1395	n							Nuclease variant[SpCas9]	-0.0821414	0.125313	0.43	0.5122	-0.326915	0.165045		3	1	0.0318209	<.0001	0.015388	0.0658025
									BIC	605.766														Delivery method[DNA-stable]	-0.391257	0.15177	6.65	0.0099	-0.68789	-0.0915465		3	2	0.114491	<.0001	0.0554029	0.236597
									Observations (or Sum Wgts)	1395														Confidence limits are likelihood-based.								≥4	1	0.0069652	<.0001	0.0026505	0.0183041
																								For log odds of Yes/No								≥4	2	0.0250607	<.0001	0.0095861	0.0655155
																																≥4	3	0.218889	0.0056	0.0747565	0.640912
																								Effect Likelihood Ratio Tests								1	2	3.59797	<.0001	2.15934	5.99509
																																1	3	31.4259	<.0001	15.197	64.9857
																								Source	Nparm	DF	L-R ChiSquare	Prob>ChiSq				2	3	8.73433	<.0001	4.2266	18.0496
																								GC-content	1	1	8.09682	0.0044				1	≥4	143.57	<.0001	54.6324	377.292
																								Number of mismatches	3	3	259.694	<.0001				2	≥4	39.903	<.0001	15.2636	104.317
																								Mismatch/es within seed sequence	1	1	47.4216	<.0001				3	≥4	4.56853	0.0056	1.56028	13.3768
																								Nuclease variant	1	1	0.428122	0.5129
																								Delivery method	1	1	6.50641	0.0107				Odds Ratios for Mismatch/es within seed sequence
																																Level1	/Level2	Odds Ratio	Prob>Chisq	Lower 95%	Upper 95%
																																No	Yes	4.62621	<.0001	2.93339	7.29596
																																Yes	No	0.21616	<.0001	0.137062	0.340903
																																Odds Ratios for Nuclease variant
																																Level1	/Level2	Odds Ratio	Prob>Chisq	Lower 95%	Upper 95%
																																Others	SpCas9	1.17855	0.5122	0.721131	1.92611
																																SpCas9	Others	0.848502	0.5122	0.519182	1.38671
																																Odds Ratios for Delivery method
																																Level1	/Level2	Odds Ratio	Prob>Chisq	Lower 95%	Upper 95%
																																Others	DNA-stable	2.18696	0.0099	1.20633	3.96474
																																DNA-stable	Others	0.457255	0.0099	0.252223	0.828959
																																Normal approximations used for ratio confidence limits effects: GC-content Number of mismatches Mismatch/es within seed sequence Nuclease variant Delivery method
																																Tests and confidence intervals on odds ratios are Wald based.

## Sheet: Reduced_Model
Nominal Logistic Fit for Off-target identified: Reduced Model																																														Contingency Analysis of Most Likely Off-target identified By Off-target identified
																																Odds Ratios	For Off-target identified odds of Yes versus No
									Whole Model Test						Fit Details				Lack Of Fit					Parameter Estimates								Odds Ratios for GC-content							Confusion Matrix							Mosaic Plot
									Model	-LogLikelihood	DF	ChiSquare	Prob>ChiSq		Measure	Training	Definition		Source	DF	-LogLikelihood	ChiSquare		Term	Estimate	Std Error	ChiSquare	Prob>ChiSq	Lower 95%	Upper 95%		Level1	/Level2	Odds Ratio	Prob>Chisq	Lower 95%	Upper 95%		Actual	Predicted
									Difference	231.434	5	462.867	<.0001		Entropy RSquare	0.4546	1-Loglike(model)/Loglike(0)		Lack Of Fit	10	10.3688	20.7376		Intercept	-2.43752	0.164907	218.48	<.0001	-2.78517	-2.13383		High	Low	1.83445	0.0175	1.11228	3.02551			Count
									Full	277.631					Generalized RSquare	0.5451	(1-(L(0)/L(model))^(2/n))/(1-L(0)^(2/n))		Saturated	15	267.262	Prob>ChiSq		GC-content[Low]	-0.303373	0.127638	5.65	0.0175	-0.558721	-0.0571944		Low	High	0.545121	0.0175	0.330523	0.899053		Off-target identified	Yes	No
									Reduced	509.064					Mean -Log p	0.199	∑ -Log(ρ[j])/n		Fitted	5	277.631	0.023		Number of mismatches[1]	2.54384	0.19732	166.2	<.0001	2.16998	2.94761									Yes	76	90
															RMSE	0.2436	√ ∑(y[j]-ρ[j])²/n							Number of mismatches[2]	1.08829	0.192356	32.01	<.0001	0.719853	1.47924		Odds Ratios for Number of mismatches							No	28	1201
															Mean Abs Dev	0.1197	∑ |y[j]-ρ[j]|/n							Number of mismatches[3]	-1.05674	0.265591	15.83	<.0001	-1.60971	-0.555518		Level1	/Level2	Odds Ratio	Prob>Chisq	Lower 95%	Upper 95%
									RSquare (U)	0.4546					Misclassification Rate	0.0846	∑ (ρ[j]≠ρMax)/n							Mismatch/es within seed sequence[Yes]	-0.794449	0.115287	47.49	<.0001	-1.02554	-0.572595		2	1	0.233273	<.0001	0.142898	0.380806
									AICc	567.322					N	1395	n							Confidence limits are likelihood-based.								3	1	0.0273079	<.0001	0.0135454	0.0550534
									BIC	598.705														For log odds of Yes/No								3	2	0.117064	<.0001	0.0585036	0.234242
									Observations (or Sum Wgts)	1395																						≥4	1	0.0059807	<.0001	0.0023107	0.0154791
																								Effect Likelihood Ratio Tests								≥4	2	0.025638	<.0001	0.0100072	0.0656837
																																≥4	3	0.219008	0.0055	0.0749782	0.639714
																								Source	Nparm	DF	L-R ChiSquare	Prob>ChiSq				1	2	4.28683	<.0001	2.62601	6.99801
																								GC-content	1	1	5.87026	0.0154				1	3	36.6195	<.0001	18.1642	73.8258
																								Number of mismatches	3	3	329.592	<.0001				2	3	8.54233	<.0001	4.26909	17.093
																								Mismatch/es within seed sequence	1	1	52.3177	<.0001				1	≥4	167.206	<.0001	64.6032	432.762
																																2	≥4	39.0046	<.0001	15.2245	99.9285
																																3	≥4	4.56604	0.0055	1.5632	13.3372
																																Odds Ratios for Mismatch/es within seed sequence
																																Level1	/Level2	Odds Ratio	Prob>Chisq	Lower 95%	Upper 95%
																																No	Yes	4.89834	<.0001	3.11734	7.69688
																																Yes	No	0.204151	<.0001	0.129923	0.320786
																																Normal approximations used for ratio confidence limits effects: GC-content Number of mismatches Mismatch/es within seed sequence
																																Tests and confidence intervals on odds ratios are Wald based.

## Sheet: Final_Model
Nominal Logistic Fit for Off-target identified: Final Model																																														Contingency Analysis of Most Likely Off-target identified By Off-target identified
																																Odds Ratios	For Off-target identified odds of Yes versus No
									Whole Model Test						Fit Details				Lack Of Fit					Parameter Estimates								Odds Ratios for Number of mismatches							Confusion Matrix							Mosaic Plot
									Model	-LogLikelihood	DF	ChiSquare	Prob>ChiSq		Measure	Training	Definition		Source	DF	-LogLikelihood	ChiSquare		Term	Estimate	Std Error	ChiSquare	Prob>ChiSq	Lower 95%	Upper 95%		Level1	/Level2	Odds Ratio	Prob>Chisq	Lower 95%	Upper 95%		Actual	Predicted
									Difference	228.499	4	456.997	<.0001		Entropy RSquare	0.4489	1-Loglike(model)/Loglike(0)		Lack Of Fit	3	1.56678	3.13357		Intercept	-2.32322	0.154032	227.49	<.0001	-2.6504	-2.04068		2	1	0.266127	<.0001	0.166151	0.426262			Count
									Full	280.566					Generalized RSquare	0.5393	(1-(L(0)/L(model))^(2/n))/(1-L(0)^(2/n))		Saturated	7	278.999	Prob>ChiSq		Number of mismatches[1]	2.50152	0.194566	165.3	<.0001	2.13267	2.89965		3	1	0.0272239	<.0001	0.0135418	0.05473		Off-target identified	Yes	No
									Reduced	509.064					Mean -Log p	0.2011	∑ -Log(ρ[j])/n		Fitted	4	280.566	0.3715		Number of mismatches[2]	1.17774	0.188532	39.02	<.0001	0.817453	1.562		3	2	0.102297	<.0001	0.0515393	0.203041		Yes	76	90
															RMSE	0.2455	√ ∑(y[j]-ρ[j])²/n							Number of mismatches[3]	-1.10214	0.264805	17.32	<.0001	-1.65377	-0.602591		≥4	1	0.0062283	<.0001	0.0024145	0.016066		No	28	1201
															Mean Abs Dev	0.1213	∑ |y[j]-ρ[j]|/n							Mismatch/es within seed sequence[Yes]	-0.794192	0.114423	48.18	<.0001	-1.02348	-0.573949		≥4	2	0.0234035	<.0001	0.009159	0.0598016
									RSquare (U)	0.4489					Misclassification Rate	0.0846	∑ (ρ[j]≠ρMax)/n							Confidence limits are likelihood-based.								≥4	3	0.22878	0.0069	0.0784442	0.667233
									AICc	571.175					N	1395	n							For log odds of Yes/No								1	2	3.7576	<.0001	2.34598	6.01863
									BIC	597.335																						1	3	36.7324	<.0001	18.2715	73.8454
									Observations (or Sum Wgts)	1395														Effect Likelihood Ratio Tests								2	3	9.77549	<.0001	4.9251	19.4027
																																1	≥4	160.557	<.0001	62.2431	414.161
																								Source	Nparm	DF	L-R ChiSquare	Prob>ChiSq				2	≥4	42.7287	<.0001	16.722	109.182
																								Number of mismatches	3	3	334.163	<.0001				3	≥4	4.371	0.0069	1.49873	12.7479
																								Mismatch/es within seed sequence	1	1	53.0343	<.0001
																																Odds Ratios for Mismatch/es within seed sequence
																																Level1	/Level2	Odds Ratio	Prob>Chisq	Lower 95%	Upper 95%
																																No	Yes	4.89583	<.0001	3.12632	7.66691
																																Yes	No	0.204255	<.0001	0.130431	0.319865
																																Normal approximations used for ratio confidence limits effects: Number of mismatches Mismatch/es within seed sequence
																																Tests and confidence intervals on odds ratios are Wald based.
